# Supplementary material for: Single-Cell RNA-Sequencing Reveals Heterogeneity and Transcriptional Dynamics in Porcine Circulating CD8+ T Cells
Source: Cells. 2024 Apr 16;13(8):692. doi: 10.3390/cells13080692 (PMC11049515; doi:10.3390/cells13080692)
Supplement: Supplementary file 1 [file cells-13-00692-s001.zip]

Archive with 5 entries (5 files):
- Supplemental Table1.xlsx
- Supplemental Table2.xlsx
- Supplemental Table3.xlsx
- Supplemental Table4.xlsx
- Supplementary Figures.pdf
