# Supplementary material for: Single-Cell RNA-Sequencing Reveals Heterogeneity and Transcriptional Dynamics in Porcine Circulating CD8+ T Cells
Source: Cells. 2024 Apr 16;13(8):692. doi: 10.3390/cells13080692 (PMC11049515; doi:10.3390/cells13080692)
Supplement: Supplementary file 1 [file cells-13-00692-s001.zip › Supplemental Table1.xlsx]

## Sheet: Sheet1
Supplemental Table S1. Differentially expressed genes among CD8 T subtypes
gene	baseMean	log2FoldChange	lfcSE	stat	pvalue	padj	gs_base
S100A6	278.752	-4.05293	0.196074	-17.6333	1.36722e-69	8.00097e-66	CD8_NAIVE_VS_OTHER_CD8_CELLS
CCL5	2767.99	-6.1634	0.344795	-16.4434	9.35689e-61	2.73782e-57	CD8_NAIVE_VS_OTHER_CD8_CELLS
S100A10	301.805	-2.40777	0.122696	-14.9116	2.77018e-50	5.40369e-47	CD8_NAIVE_VS_OTHER_CD8_CELLS
S100A4	344.242	-3.67047	0.223963	-13.8707	9.53953e-44	1.39563e-40	CD8_NAIVE_VS_OTHER_CD8_CELLS
ENSSSCG00000037142	499.268	-2.27084	0.136997	-12.4161	2.13772e-35	2.50199e-32	CD8_NAIVE_VS_OTHER_CD8_CELLS
ENSSSCG00000000663	76.7502	-3.98606	0.279737	-11.8294	2.75231e-32	2.68442e-29	CD8_NAIVE_VS_OTHER_CD8_CELLS
KLRK1	98.048	-4.90296	0.348269	-11.5408	8.21582e-31	6.86842e-28	CD8_NAIVE_VS_OTHER_CD8_CELLS
CD99	74.2228	-2.85805	0.198179	-11.4237	3.18273e-30	2.32817e-27	CD8_NAIVE_VS_OTHER_CD8_CELLS
UCP2	124.506	-2.72925	0.195756	-11.0092	3.45079e-28	2.24378e-25	CD8_NAIVE_VS_OTHER_CD8_CELLS
ITM2C	96.9171	-2.49812	0.180522	-10.6102	2.67203e-26	1.56367e-23	CD8_NAIVE_VS_OTHER_CD8_CELLS
ANXA2	47.5432	-3.21943	0.256775	-10.1108	4.94907e-24	2.6329e-21	CD8_NAIVE_VS_OTHER_CD8_CELLS
RDX	115.578	-2.25988	0.169928	-9.90461	3.97499e-23	1.93847e-20	CD8_NAIVE_VS_OTHER_CD8_CELLS
GPX1	678.406	-2.23706	0.178212	-9.52266	1.68802e-21	7.5987e-19	CD8_NAIVE_VS_OTHER_CD8_CELLS
ITGB1	86.3678	-2.47166	0.200912	-9.43474	3.91983e-21	1.63849e-18	CD8_NAIVE_VS_OTHER_CD8_CELLS
ADGRG1	43.989	-4.21307	0.380036	-9.16361	5.01897e-20	1.95807e-17	CD8_NAIVE_VS_OTHER_CD8_CELLS
GNLY	1967.89	-4.60748	0.475509	-9.05628	1.34973e-19	4.93665e-17	CD8_NAIVE_VS_OTHER_CD8_CELLS
BATF	52.4094	-3.4474	0.31364	-8.87843	6.78126e-19	2.33435e-16	CD8_NAIVE_VS_OTHER_CD8_CELLS
ENSSSCG00000006395	97.1498	-1.8833	0.150754	-8.67698	4.06426e-18	1.32134e-15	CD8_NAIVE_VS_OTHER_CD8_CELLS
ENSSSCG00000005453	112.703	-1.86831	0.152942	-8.46427	2.5776e-17	7.93901e-15	CD8_NAIVE_VS_OTHER_CD8_CELLS
S100A11	128.456	-3.73584	0.389307	-8.33745	7.59123e-17	2.22119e-14	CD8_NAIVE_VS_OTHER_CD8_CELLS
S100A13	117.93	-1.75875	0.142134	-8.32215	8.63848e-17	2.29783e-14	CD8_NAIVE_VS_OTHER_CD8_CELLS
ENSSSCG00000016903	114.482	-4.68785	0.485755	-8.32452	8.46698e-17	2.29783e-14	CD8_NAIVE_VS_OTHER_CD8_CELLS
ENSSSCG00000036618	834.506	-1.75261	0.143141	-8.28634	1.16784e-16	2.97139e-14	CD8_NAIVE_VS_OTHER_CD8_CELLS
AKAP7	36.4976	2.12233	0.185602	8.27132	1.32489e-16	3.23052e-14	CD8_NAIVE_VS_OTHER_CD8_CELLS
FLNA	62.2103	-2.29499	0.21085	-8.13201	4.2222e-16	9.88332e-14	CD8_NAIVE_VS_OTHER_CD8_CELLS
MYO1F	30.528	-3.34122	0.332737	-8.06485	7.33281e-16	1.65045e-13	CD8_NAIVE_VS_OTHER_CD8_CELLS
LEF1	101.159	2.56356	0.275353	7.72385	1.12872e-14	2.44639e-12	CD8_NAIVE_VS_OTHER_CD8_CELLS
GADD45A	15.2602	3.175	0.340427	7.57075	3.71081e-14	7.75559e-12	CD8_NAIVE_VS_OTHER_CD8_CELLS
NKG7	278.414	-2.24609	0.219765	-7.47984	7.44115e-14	1.50157e-11	CD8_NAIVE_VS_OTHER_CD8_CELLS
ENSSSCG00000000640	18.483	-4.01462	0.449835	-7.4545	9.02106e-14	1.75971e-11	CD8_NAIVE_VS_OTHER_CD8_CELLS
ENSSSCG00000035507	25.9264	3.36574	0.393512	7.41203	1.24382e-13	2.34801e-11	CD8_NAIVE_VS_OTHER_CD8_CELLS
ENSSSCG00000020777	46.5849	-2.28734	0.234602	-7.27119	3.56337e-13	6.51652e-11	CD8_NAIVE_VS_OTHER_CD8_CELLS
TBX21	18.6166	-3.49002	0.382884	-7.26043	3.85867e-13	6.84271e-11	CD8_NAIVE_VS_OTHER_CD8_CELLS
DAPK2	13.82	-3.81132	0.420057	-7.22559	4.98929e-13	8.58746e-11	CD8_NAIVE_VS_OTHER_CD8_CELLS
S1PR5	20.1923	-3.51185	0.396886	-7.21561	5.36912e-13	8.97717e-11	CD8_NAIVE_VS_OTHER_CD8_CELLS
IL2RB	27.98	-2.71409	0.310704	-6.8417	7.8259e-12	1.27214e-09	CD8_NAIVE_VS_OTHER_CD8_CELLS
ENSSSCG00000015447	8.23828	-4.00981	0.493314	-6.79171	1.10814e-11	1.75266e-09	CD8_NAIVE_VS_OTHER_CD8_CELLS
CD244	13.0102	-4.09529	0.469855	-6.75213	1.45687e-11	2.24358e-09	CD8_NAIVE_VS_OTHER_CD8_CELLS
IFNG	11.7761	-4.00263	0.471177	-6.7204	1.81231e-11	2.71939e-09	CD8_NAIVE_VS_OTHER_CD8_CELLS
TESC	23.1908	-3.12411	0.364482	-6.71531	1.87661e-11	2.74548e-09	CD8_NAIVE_VS_OTHER_CD8_CELLS
SELL	133.3	2.32692	0.284351	6.68295	2.34187e-11	3.34259e-09	CD8_NAIVE_VS_OTHER_CD8_CELLS
CX3CR1	34.1678	-4.01815	0.492811	-6.65981	2.74179e-11	3.82022e-09	CD8_NAIVE_VS_OTHER_CD8_CELLS
THY1	10.2715	3.33844	0.413149	6.64167	3.10145e-11	4.22086e-09	CD8_NAIVE_VS_OTHER_CD8_CELLS
ENSSSCG00000026217	19.4859	-3.44705	0.41475	-6.6251	3.47004e-11	4.61516e-09	CD8_NAIVE_VS_OTHER_CD8_CELLS
F2R	13.0476	-3.76048	0.428119	-6.56187	5.31359e-11	6.91002e-09	CD8_NAIVE_VS_OTHER_CD8_CELLS
ANGPT2	15.4074	3.15718	0.418611	6.50333	7.85588e-11	9.99405e-09	CD8_NAIVE_VS_OTHER_CD8_CELLS
ZEB2	15.2903	-3.57276	0.433302	-6.48401	8.93174e-11	1.1121e-08	CD8_NAIVE_VS_OTHER_CD8_CELLS
RORA	34.3122	-2.20065	0.259703	-6.3479	2.18267e-10	2.66104e-08	CD8_NAIVE_VS_OTHER_CD8_CELLS
KLRB1	12.999	-3.56532	0.462274	-6.28476	3.28353e-10	3.92147e-08	CD8_NAIVE_VS_OTHER_CD8_CELLS
LGALS1	78.2127	-3.12549	0.478584	-6.27639	3.46515e-10	4.05561e-08	CD8_NAIVE_VS_OTHER_CD8_CELLS
ZNF683	28.2239	-2.95244	0.396313	-6.16078	7.23853e-10	8.30586e-08	CD8_NAIVE_VS_OTHER_CD8_CELLS
LTBP1	5.94065	3.72704	0.466449	6.15388	7.56103e-10	8.50907e-08	CD8_NAIVE_VS_OTHER_CD8_CELLS
CDC42EP3	24.0082	-2.4412	0.302231	-6.09658	1.08361e-09	1.19647e-07	CD8_NAIVE_VS_OTHER_CD8_CELLS
GOLIM4	14.3621	2.66502	0.356249	5.99237	2.068e-09	2.2411e-07	CD8_NAIVE_VS_OTHER_CD8_CELLS
TIAM1	11.4132	2.76189	0.378314	5.85766	4.69448e-09	4.99492e-07	CD8_NAIVE_VS_OTHER_CD8_CELLS
GSTA4	26.4943	1.84283	0.222709	5.8323	5.46669e-09	5.71269e-07	CD8_NAIVE_VS_OTHER_CD8_CELLS
BEX3	5.35434	3.72166	0.478629	5.79812	6.70634e-09	6.88518e-07	CD8_NAIVE_VS_OTHER_CD8_CELLS
EFHD2	17.3177	-2.30347	0.298183	-5.72357	1.04309e-08	1.05244e-06	CD8_NAIVE_VS_OTHER_CD8_CELLS
ENSSSCG00000029596	166.443	-1.83543	0.2295	-5.68149	1.33524e-08	1.32438e-06	CD8_NAIVE_VS_OTHER_CD8_CELLS
IFI6	311.288	-1.95895	0.241191	-5.6429	1.67214e-08	1.63089e-06	CD8_NAIVE_VS_OTHER_CD8_CELLS
DUSP16	4.50879	3.21119	0.459117	5.59312	2.23019e-08	2.13952e-06	CD8_NAIVE_VS_OTHER_CD8_CELLS
CCR5	7.37096	-3.33462	0.473022	-5.54316	2.97058e-08	2.80384e-06	CD8_NAIVE_VS_OTHER_CD8_CELLS
ENSSSCG00000003253	57.5477	-1.65434	0.196575	-5.52996	3.20312e-08	2.97534e-06	CD8_NAIVE_VS_OTHER_CD8_CELLS
C15orf48	20.4101	-2.61427	0.389757	-5.5186	3.41717e-08	3.12458e-06	CD8_NAIVE_VS_OTHER_CD8_CELLS
FGL2	17.0964	-2.55865	0.361533	-5.48655	4.09856e-08	3.68996e-06	CD8_NAIVE_VS_OTHER_CD8_CELLS
LAPTM5	516.776	-1.13713	0.102517	-5.47367	4.40821e-08	3.90862e-06	CD8_NAIVE_VS_OTHER_CD8_CELLS
SLAMF7	13.0358	-2.49369	0.354957	-5.46527	4.62199e-08	4.037e-06	CD8_NAIVE_VS_OTHER_CD8_CELLS
LPCAT2	16.0825	-2.6084	0.366457	-5.46169	4.71626e-08	4.05875e-06	CD8_NAIVE_VS_OTHER_CD8_CELLS
AOAH	18.6556	-2.5677	0.37419	-5.45909	4.78574e-08	4.05886e-06	CD8_NAIVE_VS_OTHER_CD8_CELLS
GMPR	11.4451	2.64887	0.401122	5.44385	5.21419e-08	4.35906e-06	CD8_NAIVE_VS_OTHER_CD8_CELLS
CCR9	15.8369	2.8385	0.424892	5.42935	5.65608e-08	4.66188e-06	CD8_NAIVE_VS_OTHER_CD8_CELLS
RGS10	45.1788	2.18822	0.313876	5.41644	6.07978e-08	4.87382e-06	CD8_NAIVE_VS_OTHER_CD8_CELLS
CD69	66.4645	1.83367	0.245731	5.41722	6.05315e-08	4.87382e-06	CD8_NAIVE_VS_OTHER_CD8_CELLS
DYRK2	25.8646	1.65618	0.200075	5.37644	7.59748e-08	6.00817e-06	CD8_NAIVE_VS_OTHER_CD8_CELLS
RHOQ	9.9073	-3.02824	0.451127	-5.3617	8.2443e-08	6.43275e-06	CD8_NAIVE_VS_OTHER_CD8_CELLS
ARPC5L	91.1862	-1.50821	0.17592	-5.30764	1.11053e-07	8.55107e-06	CD8_NAIVE_VS_OTHER_CD8_CELLS
PTPN4	14.2677	-2.48888	0.360816	-5.28005	1.29148e-07	9.81524e-06	CD8_NAIVE_VS_OTHER_CD8_CELLS
PDK1	68.7796	2.07634	0.330064	5.25985	1.44172e-07	1.08166e-05	CD8_NAIVE_VS_OTHER_CD8_CELLS
TMSB10	4892.19	-0.872377	0.0560805	-5.23908	1.61378e-07	1.19542e-05	CD8_NAIVE_VS_OTHER_CD8_CELLS
FGR	8.81684	-3.22355	0.466799	-5.22353	1.75548e-07	1.28413e-05	CD8_NAIVE_VS_OTHER_CD8_CELLS
PLAC8	870.721	1.7309	0.232974	5.21022	1.88615e-07	1.36269e-05	CD8_NAIVE_VS_OTHER_CD8_CELLS
VCL	13.3982	-2.51778	0.36802	-5.18749	2.13143e-07	1.52111e-05	CD8_NAIVE_VS_OTHER_CD8_CELLS
STX11	6.62014	-3.05266	0.472169	-5.13204	2.86619e-07	2.02083e-05	CD8_NAIVE_VS_OTHER_CD8_CELLS
ISG20	18.4744	-2.68566	0.401555	-5.12854	2.91997e-07	2.03425e-05	CD8_NAIVE_VS_OTHER_CD8_CELLS
FAM49A	9.18528	-2.96095	0.45867	-5.0817	3.74078e-07	2.57542e-05	CD8_NAIVE_VS_OTHER_CD8_CELLS
HMGB2	97.7364	-1.71137	0.227199	-5.0327	4.83623e-07	3.29089e-05	CD8_NAIVE_VS_OTHER_CD8_CELLS
TNFRSF1B	15.771	-2.24762	0.333649	-5.01772	5.22882e-07	3.51713e-05	CD8_NAIVE_VS_OTHER_CD8_CELLS
ENSSSCG00000030300	7.76728	-3.02162	0.491092	-4.98132	6.31505e-07	4.19951e-05	CD8_NAIVE_VS_OTHER_CD8_CELLS
SAMD3	16.7081	-2.09913	0.30736	-4.96714	6.79473e-07	4.43233e-05	CD8_NAIVE_VS_OTHER_CD8_CELLS
ADGRE5	38.8505	-1.69405	0.2256	-4.96652	6.81664e-07	4.43233e-05	CD8_NAIVE_VS_OTHER_CD8_CELLS
RBPMS	7.58578	-2.94524	0.458275	-4.95902	7.08489e-07	4.55613e-05	CD8_NAIVE_VS_OTHER_CD8_CELLS
IL18R1	9.24628	-2.68799	0.426455	-4.95652	7.17674e-07	4.56503e-05	CD8_NAIVE_VS_OTHER_CD8_CELLS
TTF2	19.2569	-2.07895	0.305686	-4.9396	7.82843e-07	4.92602e-05	CD8_NAIVE_VS_OTHER_CD8_CELLS
PRDM1	4.35163	-3.11788	0.506518	-4.92561	8.40967e-07	5.23547e-05	CD8_NAIVE_VS_OTHER_CD8_CELLS
VMP1	63.098	-1.64307	0.221171	-4.92271	8.53532e-07	5.25776e-05	CD8_NAIVE_VS_OTHER_CD8_CELLS
ITGAL	30.5263	-1.73744	0.237634	-4.91883	8.70641e-07	5.30728e-05	CD8_NAIVE_VS_OTHER_CD8_CELLS
LIX1	16.6597	2.4877	0.531145	4.90322	9.42762e-07	5.68767e-05	CD8_NAIVE_VS_OTHER_CD8_CELLS
CD1D	24.281	-1.75903	0.24187	-4.8938	9.89059e-07	5.9061e-05	CD8_NAIVE_VS_OTHER_CD8_CELLS
LAX1	29.7156	-1.95514	0.290358	-4.89088	1.00388e-06	5.93406e-05	CD8_NAIVE_VS_OTHER_CD8_CELLS
CERS6	10.2278	2.43251	0.473442	4.87738	1.07506e-06	6.29126e-05	CD8_NAIVE_VS_OTHER_CD8_CELLS
PPIF	12.9813	1.99014	0.292978	4.86497	1.14474e-06	6.63269e-05	CD8_NAIVE_VS_OTHER_CD8_CELLS
FAM83A	9.45827	-2.63203	0.412915	-4.84712	1.25266e-06	7.18684e-05	CD8_NAIVE_VS_OTHER_CD8_CELLS
ENSSSCG00000016400	6.45917	2.78329	0.461075	4.83812	1.31071e-06	7.37524e-05	CD8_NAIVE_VS_OTHER_CD8_CELLS
PDCD1	8.77458	-2.66951	0.411676	-4.83837	1.30909e-06	7.37524e-05	CD8_NAIVE_VS_OTHER_CD8_CELLS
TPM2	49.0475	1.85766	0.316632	4.80108	1.57811e-06	8.79532e-05	CD8_NAIVE_VS_OTHER_CD8_CELLS
DUT	47.3541	-2.12503	0.319899	-4.72535	2.29725e-06	0.000126825	CD8_NAIVE_VS_OTHER_CD8_CELLS
SATB1	9.17314	2.12875	0.323872	4.7167	2.39704e-06	0.000131098	CD8_NAIVE_VS_OTHER_CD8_CELLS
CD200	9.02644	2.52569	0.428397	4.69975	2.60483e-06	0.000141143	CD8_NAIVE_VS_OTHER_CD8_CELLS
ITGB2	158.764	-1.48765	0.195594	-4.69322	2.6894e-06	0.000144389	CD8_NAIVE_VS_OTHER_CD8_CELLS
LSP1	262.66	-1.1484	0.122699	-4.68649	2.77927e-06	0.000146525	CD8_NAIVE_VS_OTHER_CD8_CELLS
PLAAT3	7.55774	-2.72835	0.452969	-4.68795	2.75952e-06	0.000146525	CD8_NAIVE_VS_OTHER_CD8_CELLS
CCL4	5.41137	-3.02523	0.504657	-4.6683	3.03697e-06	0.000158682	CD8_NAIVE_VS_OTHER_CD8_CELLS
NOL9	16.2639	1.87065	0.283086	4.66342	3.10991e-06	0.000161055	CD8_NAIVE_VS_OTHER_CD8_CELLS
KLHL8	6.68012	-2.6624	0.443645	-4.6075	4.07532e-06	0.0002092	CD8_NAIVE_VS_OTHER_CD8_CELLS
SNTB2	8.18129	-2.50044	0.410465	-4.59627	4.30129e-06	0.00021888	CD8_NAIVE_VS_OTHER_CD8_CELLS
ENSSSCG00000010006	4.17521	2.56517	0.486816	4.57271	4.81463e-06	0.00024127	CD8_NAIVE_VS_OTHER_CD8_CELLS
FASLG	4.78835	-3.06842	0.513408	-4.57231	4.82374e-06	0.00024127	CD8_NAIVE_VS_OTHER_CD8_CELLS
MNDA	18.0361	1.87578	0.294336	4.55174	5.32042e-06	0.000263857	CD8_NAIVE_VS_OTHER_CD8_CELLS
ANXA5	10.8544	-2.32701	0.383328	-4.52373	6.07606e-06	0.000298799	CD8_NAIVE_VS_OTHER_CD8_CELLS
CD4	6.92964	-2.75374	0.450359	-4.49902	6.82684e-06	0.000332922	CD8_NAIVE_VS_OTHER_CD8_CELLS
TBC1D20	40.8478	1.49103	0.207811	4.49056	7.10378e-06	0.000343565	CD8_NAIVE_VS_OTHER_CD8_CELLS
CTSD	90.714	-1.38373	0.182065	-4.46072	8.16853e-06	0.000382935	CD8_NAIVE_VS_OTHER_CD8_CELLS
ENSSSCG00000039071	195.14	-1.08392	0.114081	-4.46043	8.17958e-06	0.000382935	CD8_NAIVE_VS_OTHER_CD8_CELLS
CCR7	135.051	2.1483	0.459705	4.46259	8.09749e-06	0.000382935	CD8_NAIVE_VS_OTHER_CD8_CELLS
ABHD15	9.06814	-2.65112	0.457834	-4.4609	8.16154e-06	0.000382935	CD8_NAIVE_VS_OTHER_CD8_CELLS
BST2	27.632	-1.6512	0.245433	-4.43197	9.33771e-06	0.000433685	CD8_NAIVE_VS_OTHER_CD8_CELLS
SPTBN1	37.576	1.62776	0.244012	4.42629	9.58691e-06	0.000441753	CD8_NAIVE_VS_OTHER_CD8_CELLS
RCAN3	58.5751	1.30521	0.165765	4.42178	9.78915e-06	0.000447548	CD8_NAIVE_VS_OTHER_CD8_CELLS
LDLRAP1	21.2406	1.72398	0.270059	4.41731	9.99347e-06	0.000450347	CD8_NAIVE_VS_OTHER_CD8_CELLS
RCHY1	39.0463	-1.459	0.202609	-4.41708	1.00043e-05	0.000450347	CD8_NAIVE_VS_OTHER_CD8_CELLS
TRAPPC6A	11.5572	1.90524	0.305435	4.39396	1.11304e-05	0.000497213	CD8_NAIVE_VS_OTHER_CD8_CELLS
BACH2	4.8213	2.37494	0.404031	4.3919	1.12366e-05	0.000498154	CD8_NAIVE_VS_OTHER_CD8_CELLS
STMN3	19.0996	-2.13645	0.363581	-4.38832	1.14227e-05	0.000502601	CD8_NAIVE_VS_OTHER_CD8_CELLS
ENSSSCG00000026140	87.5707	1.43796	0.203654	4.36873	1.24973e-05	0.000545776	CD8_NAIVE_VS_OTHER_CD8_CELLS
TC2N	4.80489	2.58787	0.46433	4.36395	1.27733e-05	0.000553699	CD8_NAIVE_VS_OTHER_CD8_CELLS
ENSSSCG00000027232	4.80058	2.46307	0.484517	4.35811	1.31192e-05	0.000564513	CD8_NAIVE_VS_OTHER_CD8_CELLS
FAM89A	15.1712	1.96552	0.379879	4.33877	1.43282e-05	0.000612032	CD8_NAIVE_VS_OTHER_CD8_CELLS
P2RY14	4.57752	2.38058	0.429315	4.33659	1.44713e-05	0.000613666	CD8_NAIVE_VS_OTHER_CD8_CELLS
ENSSSCG00000024973	198.893	-1.34574	0.181647	-4.32777	1.50629e-05	0.000634159	CD8_NAIVE_VS_OTHER_CD8_CELLS
FADS3	38.1545	2.13453	0.438087	4.32033	1.55798e-05	0.000651234	CD8_NAIVE_VS_OTHER_CD8_CELLS
MAP4K4	9.12726	2.0555	0.350077	4.29453	1.75066e-05	0.000726586	CD8_NAIVE_VS_OTHER_CD8_CELLS
SPNS3	4.73919	-2.72575	0.496985	-4.27646	1.89891e-05	0.000782566	CD8_NAIVE_VS_OTHER_CD8_CELLS
KLK7	13.6476	2.11507	0.404404	4.27462	1.91461e-05	0.000783516	CD8_NAIVE_VS_OTHER_CD8_CELLS
TP53I13	5.45061	-2.56412	0.460588	-4.26863	1.96674e-05	0.000799262	CD8_NAIVE_VS_OTHER_CD8_CELLS
CST7	122.197	-1.40273	0.196538	-4.26263	2.02032e-05	0.000815375	CD8_NAIVE_VS_OTHER_CD8_CELLS
PRF1	39.6305	-1.88683	0.303807	-4.25335	2.10592e-05	0.000844098	CD8_NAIVE_VS_OTHER_CD8_CELLS
MISP3	20.4568	-1.80294	0.297776	-4.21106	2.54176e-05	0.00100634	CD8_NAIVE_VS_OTHER_CD8_CELLS
DNASE2	11.664	1.68964	0.274439	4.21006	2.55306e-05	0.00100634	CD8_NAIVE_VS_OTHER_CD8_CELLS
FAR2	4.29362	-2.64087	0.499832	-4.20924	2.56228e-05	0.00100634	CD8_NAIVE_VS_OTHER_CD8_CELLS
ENSSSCG00000035224	49.1541	-1.66635	0.258478	-4.19964	2.67335e-05	0.00104296	CD8_NAIVE_VS_OTHER_CD8_CELLS
ENSSSCG00000001407	11.4767	-2.19459	0.393222	-4.19075	2.78038e-05	0.00107753	CD8_NAIVE_VS_OTHER_CD8_CELLS
ENSSSCG00000009926	19.7991	1.647	0.254784	4.17926	2.92455e-05	0.00112595	CD8_NAIVE_VS_OTHER_CD8_CELLS
TMEM134	22.9061	-1.62166	0.255679	-4.11865	3.81103e-05	0.00145766	CD8_NAIVE_VS_OTHER_CD8_CELLS
IRAK2	3.69605	-2.62087	0.511233	-4.1118	3.92581e-05	0.00149181	CD8_NAIVE_VS_OTHER_CD8_CELLS
RPL5	715.72	1.18902	0.152667	4.0798	4.50738e-05	0.00170175	CD8_NAIVE_VS_OTHER_CD8_CELLS
IL10	4.017	-2.76991	0.522862	-4.06547	4.79357e-05	0.00177544	CD8_NAIVE_VS_OTHER_CD8_CELLS
FAM126A	11.0314	-1.85572	0.319029	-4.06611	4.78038e-05	0.00177544	CD8_NAIVE_VS_OTHER_CD8_CELLS
IL4R	11.317	-2.01695	0.358127	-4.06704	4.76142e-05	0.00177544	CD8_NAIVE_VS_OTHER_CD8_CELLS
ZBTB20	13.6623	1.67302	0.273511	4.06194	4.86669e-05	0.00179119	CD8_NAIVE_VS_OTHER_CD8_CELLS
RHOC	15.9074	-1.99611	0.35152	-4.03181	5.53484e-05	0.00202437	CD8_NAIVE_VS_OTHER_CD8_CELLS
GPR55	5.53625	-2.62477	0.501512	-4.03023	5.57223e-05	0.00202538	CD8_NAIVE_VS_OTHER_CD8_CELLS
CCDC50	13.5757	-1.71636	0.288688	-4.02298	5.74665e-05	0.00207589	CD8_NAIVE_VS_OTHER_CD8_CELLS
TMEM9	11.6611	1.88287	0.333518	4.01544	5.93357e-05	0.00213026	CD8_NAIVE_VS_OTHER_CD8_CELLS
ENSSSCG00000036013	11.15	1.76722	0.295392	4.01006	6.07026e-05	0.00216604	CD8_NAIVE_VS_OTHER_CD8_CELLS
NKX3-1	9.86399	2.02664	0.452033	3.99727	6.40765e-05	0.00225906	CD8_NAIVE_VS_OTHER_CD8_CELLS
RPS3A	3033.22	1.0645	0.123964	3.99725	6.40814e-05	0.00225906	CD8_NAIVE_VS_OTHER_CD8_CELLS
SNX10	25.2101	-1.60998	0.269432	-3.97766	6.95962e-05	0.00243878	CD8_NAIVE_VS_OTHER_CD8_CELLS
CD40LG	6.00982	-2.41419	0.466552	-3.97092	7.15946e-05	0.00249388	CD8_NAIVE_VS_OTHER_CD8_CELLS
GPR155	5.10439	2.14184	0.400625	3.95476	7.66123e-05	0.00265287	CD8_NAIVE_VS_OTHER_CD8_CELLS
BHLHE40	3.40536	-2.64585	0.524152	-3.95238	7.7378e-05	0.00266362	CD8_NAIVE_VS_OTHER_CD8_CELLS
YBX3	18.8301	1.85788	0.323244	3.94847	7.86529e-05	0.00269168	CD8_NAIVE_VS_OTHER_CD8_CELLS
CDKN2C	5.32043	-2.42964	0.459091	-3.94418	8.00729e-05	0.00272434	CD8_NAIVE_VS_OTHER_CD8_CELLS
IGFBP2	8.56348	2.07162	0.43914	3.9402	8.14148e-05	0.00275398	CD8_NAIVE_VS_OTHER_CD8_CELLS
RALGPS2	10.1309	1.9311	0.402617	3.93646	8.26937e-05	0.00278117	CD8_NAIVE_VS_OTHER_CD8_CELLS
ENSSSCG00000011234	41.0956	-1.35039	0.199045	-3.91792	8.93165e-05	0.00298675	CD8_NAIVE_VS_OTHER_CD8_CELLS
TNFSF10	22.1919	-1.69692	0.296964	-3.9097	9.24103e-05	0.00307264	CD8_NAIVE_VS_OTHER_CD8_CELLS
SULT2B1	6.89335	2.13831	0.406004	3.90326	9.4904e-05	0.00313759	CD8_NAIVE_VS_OTHER_CD8_CELLS
PRR5L	3.37991	-2.70795	0.523049	-3.90191	9.54358e-05	0.00313759	CD8_NAIVE_VS_OTHER_CD8_CELLS
ENSSSCG00000022925	5.19601	-2.35728	0.459533	-3.89569	9.7921e-05	0.0032013	CD8_NAIVE_VS_OTHER_CD8_CELLS
AHI1	20.0045	1.78758	0.329126	3.88362	0.000102914	0.00334585	CD8_NAIVE_VS_OTHER_CD8_CELLS
LY9	13.0864	-1.82322	0.319991	-3.87843	0.000105134	0.00339914	CD8_NAIVE_VS_OTHER_CD8_CELLS
PDLIM7	27.559	-1.55726	0.261227	-3.8718	0.000108033	0.00347369	CD8_NAIVE_VS_OTHER_CD8_CELLS
HPSE	11.182	1.8547	0.37252	3.85946	0.000113637	0.0036339	CD8_NAIVE_VS_OTHER_CD8_CELLS
ITGA4	91.8005	-1.08921	0.135347	-3.84516	0.000120471	0.00383151	CD8_NAIVE_VS_OTHER_CD8_CELLS
RPL23	3047.64	1.01934	0.116954	3.82462	0.000130976	0.00414308	CD8_NAIVE_VS_OTHER_CD8_CELLS
ARRB2	39.9624	-1.27854	0.184762	-3.82054	0.000133161	0.00418956	CD8_NAIVE_VS_OTHER_CD8_CELLS
ANGPTL1	8.00301	2.19932	0.414925	3.81057	0.000138645	0.00433877	CD8_NAIVE_VS_OTHER_CD8_CELLS
IL10RA	26.787	-1.47929	0.239093	-3.80625	0.000141088	0.00439174	CD8_NAIVE_VS_OTHER_CD8_CELLS
SGCA	24.6956	1.62039	0.304148	3.80069	0.000144293	0.00446773	CD8_NAIVE_VS_OTHER_CD8_CELLS
FAM129A	9.68505	-2.04249	0.390165	-3.78467	0.000153916	0.0047406	CD8_NAIVE_VS_OTHER_CD8_CELLS
TMIGD2	6.02363	2.04622	0.475441	3.78272	0.000155123	0.00475279	CD8_NAIVE_VS_OTHER_CD8_CELLS
JAKMIP1	9.72945	-2.0173	0.381335	-3.7442	0.000180966	0.00551571	CD8_NAIVE_VS_OTHER_CD8_CELLS
NEK6	4.53793	-2.40411	0.492174	-3.73382	0.000188594	0.00571841	CD8_NAIVE_VS_OTHER_CD8_CELLS
SRPK2	23.6823	1.37532	0.216251	3.72723	0.000193599	0.00583992	CD8_NAIVE_VS_OTHER_CD8_CELLS
RNASEH2B	40.5999	1.2014	0.168139	3.72461	0.000195615	0.00587046	CD8_NAIVE_VS_OTHER_CD8_CELLS
LAG3	10.723	-2.1567	0.472415	-3.71999	0.000199233	0.00594853	CD8_NAIVE_VS_OTHER_CD8_CELLS
PLEKHG3	4.56176	-2.44378	0.476838	-3.70067	0.000215035	0.00638774	CD8_NAIVE_VS_OTHER_CD8_CELLS
PQLC3	15.381	-1.61521	0.282904	-3.69303	0.000221602	0.00654957	CD8_NAIVE_VS_OTHER_CD8_CELLS
HVCN1	12.2449	1.69316	0.319748	3.68278	0.0002307	0.0067842	CD8_NAIVE_VS_OTHER_CD8_CELLS
GOLM1	17.4764	-1.63078	0.299263	-3.67427	0.00023853	0.00697938	CD8_NAIVE_VS_OTHER_CD8_CELLS
TCF7	95.6986	1.56865	0.310691	3.67192	0.000240732	0.00700878	CD8_NAIVE_VS_OTHER_CD8_CELLS
NDFIP2	42.5906	-1.29778	0.202071	-3.66779	0.000244658	0.00708782	CD8_NAIVE_VS_OTHER_CD8_CELLS
HLA-DRA	225.745	-1.35677	0.216161	-3.66474	0.000247594	0.00713754	CD8_NAIVE_VS_OTHER_CD8_CELLS
PSMB9	67.7996	-1.12629	0.152019	-3.66153	0.000250714	0.00719206	CD8_NAIVE_VS_OTHER_CD8_CELLS
COQ8B	18.3598	1.5807	0.283171	3.64978	0.000262464	0.00748791	CD8_NAIVE_VS_OTHER_CD8_CELLS
ATXN7L1	11.2934	-1.7243	0.323597	-3.64868	0.000263587	0.00748791	CD8_NAIVE_VS_OTHER_CD8_CELLS
ENSSSCG00000016687	2.75035	-2.4612	0.528491	-3.64013	0.000272505	0.00770387	CD8_NAIVE_VS_OTHER_CD8_CELLS
HOMER2	5.04784	2.12863	0.482888	3.63557	0.000277371	0.00780374	CD8_NAIVE_VS_OTHER_CD8_CELLS
PFKP	20.4977	-1.45998	0.246319	-3.60625	0.000310659	0.00869844	CD8_NAIVE_VS_OTHER_CD8_CELLS
DNASE1L1	6.75489	-2.26019	0.476773	-3.59752	0.000321262	0.00895249	CD8_NAIVE_VS_OTHER_CD8_CELLS
IQGAP2	10.2397	-1.88607	0.388103	-3.59388	0.000325784	0.0090355	CD8_NAIVE_VS_OTHER_CD8_CELLS
GSTM3	6.55606	1.80512	0.359144	3.5844	0.000337856	0.0093261	CD8_NAIVE_VS_OTHER_CD8_CELLS
ADORA2A	2.59714	-2.48747	0.539787	-3.58191	0.000341096	0.00937135	CD8_NAIVE_VS_OTHER_CD8_CELLS
ENSSSCG00000006156	17.3662	1.42137	0.240784	3.57994	0.000343677	0.00939812	CD8_NAIVE_VS_OTHER_CD8_CELLS
NOS2	3.25113	-2.43248	0.519857	-3.56002	0.000370829	0.0100934	CD8_NAIVE_VS_OTHER_CD8_CELLS
ELOVL5	13.5697	-1.66742	0.314356	-3.52487	0.000423693	0.011479	CD8_NAIVE_VS_OTHER_CD8_CELLS
EMB	24.5038	-1.34639	0.226708	-3.50628	0.000454411	0.0122544	CD8_NAIVE_VS_OTHER_CD8_CELLS
SEMA6D	4.48335	-2.43672	0.510956	-3.49397	0.000475899	0.0127751	CD8_NAIVE_VS_OTHER_CD8_CELLS
GNB2	77.129	-1.1435	0.163986	-3.48809	0.00048648	0.0129995	CD8_NAIVE_VS_OTHER_CD8_CELLS
EXOSC5	14.3582	1.54462	0.283844	3.4781	0.000504978	0.0134324	CD8_NAIVE_VS_OTHER_CD8_CELLS
ZBTB38	6.52064	-1.91494	0.398889	-3.46458	0.000531058	0.0140622	CD8_NAIVE_VS_OTHER_CD8_CELLS
PNPLA6	9.0953	-1.83758	0.375906	-3.45631	0.000547629	0.0144357	CD8_NAIVE_VS_OTHER_CD8_CELLS
SKAP2	8.89845	-2.04781	0.411618	-3.45028	0.000560009	0.0146958	CD8_NAIVE_VS_OTHER_CD8_CELLS
ENSSSCG00000014909	13.7464	-2.00977	0.418498	-3.43896	0.000583958	0.0152559	CD8_NAIVE_VS_OTHER_CD8_CELLS
ENSSSCG00000012541	6.77915	1.813	0.370304	3.43616	0.000590012	0.0153456	CD8_NAIVE_VS_OTHER_CD8_CELLS
GZMK	41.3061	-1.76217	0.442814	-3.43151	0.000600239	0.0155425	CD8_NAIVE_VS_OTHER_CD8_CELLS
C1orf21	3.06472	-2.23845	0.513973	-3.41949	0.000627383	0.0161738	CD8_NAIVE_VS_OTHER_CD8_CELLS
EML4	44.5891	-1.18804	0.188598	-3.41496	0.000637918	0.0163732	CD8_NAIVE_VS_OTHER_CD8_CELLS
ARHGEF3	22.9889	-1.55701	0.288941	-3.40779	0.000654918	0.0167362	CD8_NAIVE_VS_OTHER_CD8_CELLS
ST3GAL5	8.34149	-1.86375	0.398159	-3.39466	0.000687127	0.0174829	CD8_NAIVE_VS_OTHER_CD8_CELLS
PTPRE	21.6376	-1.40209	0.246837	-3.38561	0.000710198	0.0179917	CD8_NAIVE_VS_OTHER_CD8_CELLS
BAZ2B	3.84661	1.971	0.447033	3.38427	0.000713671	0.0180017	CD8_NAIVE_VS_OTHER_CD8_CELLS
LY75	6.00836	1.94872	0.446793	3.37052	0.000750257	0.0188292	CD8_NAIVE_VS_OTHER_CD8_CELLS
ENSSSCG00000008898	40.9298	-1.67628	0.313699	-3.36955	0.000752911	0.0188292	CD8_NAIVE_VS_OTHER_CD8_CELLS
WSCD1	2.12119	-2.29513	0.544648	-3.35459	0.000794839	0.0197932	CD8_NAIVE_VS_OTHER_CD8_CELLS
ENSSSCG00000037775	81.6136	-1.09995	0.15901	-3.352	0.000802304	0.0198944	CD8_NAIVE_VS_OTHER_CD8_CELLS
LAT2	37.4617	-1.48802	0.272841	-3.34371	0.000826649	0.0204116	CD8_NAIVE_VS_OTHER_CD8_CELLS
CDK2AP2	77.5485	-1.04735	0.143298	-3.32837	0.000873571	0.0214796	CD8_NAIVE_VS_OTHER_CD8_CELLS
PLEK	12.7719	-1.86098	0.39332	-3.32226	0.000892926	0.0218636	CD8_NAIVE_VS_OTHER_CD8_CELLS
HACD4	3.22579	-2.18936	0.513141	-3.31879	0.000904074	0.0220443	CD8_NAIVE_VS_OTHER_CD8_CELLS
SH3BGRL3	388.98	-0.887205	0.0938925	-3.31293	0.000923229	0.0223254	CD8_NAIVE_VS_OTHER_CD8_CELLS
ENSSSCG00000035256	93.0853	-1.20227	0.188529	-3.31322	0.000922268	0.0223254	CD8_NAIVE_VS_OTHER_CD8_CELLS
SAMHD1	42.3201	-1.17938	0.18571	-3.30586	0.000946837	0.022802	CD8_NAIVE_VS_OTHER_CD8_CELLS
SOX4	3.6323	1.89601	0.513876	3.29352	0.000989423	0.0237299	CD8_NAIVE_VS_OTHER_CD8_CELLS
CHD7	10.8693	1.51211	0.28877	3.29003	0.00100175	0.0239276	CD8_NAIVE_VS_OTHER_CD8_CELLS
ZBTB18	11.0567	1.66431	0.413373	3.28416	0.00102288	0.0243329	CD8_NAIVE_VS_OTHER_CD8_CELLS
ENSSSCG00000034617	3462.58	0.928309	0.109221	3.25608	0.00112961	0.0267631	CD8_NAIVE_VS_OTHER_CD8_CELLS
RAP1GAP2	2.66697	-2.36429	0.535452	-3.24841	0.0011605	0.0273841	CD8_NAIVE_VS_OTHER_CD8_CELLS
ENSSSCG00000003042	3610.62	0.93966	0.11372	3.23308	0.00122464	0.0286665	CD8_NAIVE_VS_OTHER_CD8_CELLS
PHYH	10.3567	1.64345	0.347874	3.23414	0.00122009	0.0286665	CD8_NAIVE_VS_OTHER_CD8_CELLS
NAPSA	18.5674	1.36497	0.251271	3.22838	0.00124494	0.0290254	CD8_NAIVE_VS_OTHER_CD8_CELLS
VAMP5	71.4591	-1.18486	0.191169	-3.21744	0.00129339	0.0300355	CD8_NAIVE_VS_OTHER_CD8_CELLS
LMO4	29.273	1.28501	0.229723	3.21361	0.00131077	0.0303186	CD8_NAIVE_VS_OTHER_CD8_CELLS
MX1	6.33744	-1.76227	0.40236	-3.21125	0.00132158	0.0304483	CD8_NAIVE_VS_OTHER_CD8_CELLS
ARRB1	9.21704	1.57447	0.323137	3.19644	0.00139136	0.0318791	CD8_NAIVE_VS_OTHER_CD8_CELLS
ZNF831	3.24978	-2.16631	0.500779	-3.19577	0.00139457	0.0318791	CD8_NAIVE_VS_OTHER_CD8_CELLS
CALHM2	3.96912	-2.13322	0.484845	-3.19425	0.00140195	0.0319229	CD8_NAIVE_VS_OTHER_CD8_CELLS
OSTF1	112.156	-0.937578	0.11389	-3.19308	0.00140766	0.0319288	CD8_NAIVE_VS_OTHER_CD8_CELLS
ENSSSCG00000009673	2.28749	-2.08907	0.537288	-3.19095	0.00141804	0.03204	CD8_NAIVE_VS_OTHER_CD8_CELLS
EVL	159.647	1.31893	0.262426	3.1478	0.00164501	0.0370255	CD8_NAIVE_VS_OTHER_CD8_CELLS
HPCAL1	10.0264	-1.70348	0.356513	-3.12167	0.00179829	0.0403203	CD8_NAIVE_VS_OTHER_CD8_CELLS
CCL3L1	11.8214	-2.43258	0.542293	-3.11057	0.00186725	0.0417066	CD8_NAIVE_VS_OTHER_CD8_CELLS
GCSAM	3.08408	-2.02686	0.531488	-3.10107	0.00192822	0.0429047	CD8_NAIVE_VS_OTHER_CD8_CELLS
RPS6KA1	25.1921	-1.32784	0.24332	-3.09317	0.00198028	0.0438962	CD8_NAIVE_VS_OTHER_CD8_CELLS
FCER1G	35.0711	-2.10381	0.526216	-3.07727	0.00208906	0.0461327	CD8_NAIVE_VS_OTHER_CD8_CELLS
MAP3K8	2.50274	-2.05572	0.526149	-3.07518	0.00210377	0.0462828	CD8_NAIVE_VS_OTHER_CD8_CELLS
ENSSSCG00000032556	188.903	-0.889736	0.101987	-3.07345	0.00211597	0.046377	CD8_NAIVE_VS_OTHER_CD8_CELLS
DYNLT3	68.3575	-1.18792	0.204107	-3.05763	0.00223097	0.0487151	CD8_NAIVE_VS_OTHER_CD8_CELLS
REV1	30.5369	1.22866	0.218144	3.05538	0.00224773	0.0488985	CD8_NAIVE_VS_OTHER_CD8_CELLS
GZMK	70.5392	2.69324	0.176484	12.3891	2.9932e-35	1.44602e-31	CD8_memory_VS_OTHER_CD8_CELLS
GNLY	1741.35	-1.88624	0.240842	-8.64683	5.29481e-18	1.27896e-14	CD8_memory_VS_OTHER_CD8_CELLS
IL6R	14.701	2.01615	0.231089	6.5014	7.95751e-11	1.28142e-07	CD8_memory_VS_OTHER_CD8_CELLS
GPR183	42.0259	1.81645	0.20607	6.42841	1.28942e-10	1.5573e-07	CD8_memory_VS_OTHER_CD8_CELLS
ADGRG1	41.299	-1.58879	0.227865	-5.36947	7.89692e-08	7.63e-05	CD8_memory_VS_OTHER_CD8_CELLS
LAG3	16.8018	1.44094	0.225578	4.67765	2.90177e-06	0.00233641	CD8_memory_VS_OTHER_CD8_CELLS
ENSSSCG00000008898	36.8945	-1.3584	0.204051	-4.53551	5.74656e-06	0.00396595	CD8_memory_VS_OTHER_CD8_CELLS
CX3CR1	32.0405	-1.23389	0.240251	-4.44714	8.70213e-06	0.00467111	CD8_memory_VS_OTHER_CD8_CELLS
S1PR5	18.9751	-1.30892	0.240008	-4.46775	7.90459e-06	0.00467111	CD8_memory_VS_OTHER_CD8_CELLS
CXCR3	23.7886	1.33279	0.201678	4.36105	1.2944e-05	0.00625325	CD8_memory_VS_OTHER_CD8_CELLS
CD74	717.407	0.856473	0.0759221	3.82954	0.000128384	0.0493456	CD8_memory_VS_OTHER_CD8_CELLS
CCDC146	6.26964	0.74406	0.194754	3.80292	0.000143001	0.0493456	CD8_memory_VS_OTHER_CD8_CELLS
TRDC	62.2313	-0.532053	0.203893	-3.81689	0.000135145	0.0493456	CD8_memory_VS_OTHER_CD8_CELLS
CD9	8.8236	1.31535	0.236403	3.82515	0.000130692	0.0493456	CD8_memory_VS_OTHER_CD8_CELLS
LEF1	56.9806	-3.31387	0.284714	-9.23491	2.58495e-20	1.51271e-16	CD8_effector_VS_OTHER_CD8_CELLS
PLAC8	522.517	-2.15643	0.195277	-8.25197	1.55803e-16	4.55879e-13	CD8_effector_VS_OTHER_CD8_CELLS
SELL	79.8085	-2.67991	0.273771	-7.87989	3.27658e-15	6.39152e-12	CD8_effector_VS_OTHER_CD8_CELLS
CCR7	73.9005	-3.10895	0.366345	-7.81212	5.62347e-15	8.22714e-12	CD8_effector_VS_OTHER_CD8_CELLS
PDK1	40.5411	-2.67436	0.290046	-7.14599	8.93496e-13	1.04575e-09	CD8_effector_VS_OTHER_CD8_CELLS
TPM2	29.0027	-2.82258	0.309454	-6.88201	5.90126e-12	5.75569e-09	CD8_effector_VS_OTHER_CD8_CELLS
ENSSSCG00000000663	126.182	2.26174	0.269341	6.65716	2.79166e-11	2.33382e-08	CD8_effector_VS_OTHER_CD8_CELLS
LIX1	7.75616	-3.19557	0.388011	-6.3786	1.78712e-10	1.30728e-07	CD8_effector_VS_OTHER_CD8_CELLS
TCF7	62.6793	-1.94864	0.22402	-6.20046	5.6297e-10	3.66056e-07	CD8_effector_VS_OTHER_CD8_CELLS
FADS3	22.0368	-2.50476	0.310639	-6.16435	7.07746e-10	4.14173e-07	CD8_effector_VS_OTHER_CD8_CELLS
SOD1	95.3236	-1.54933	0.162192	-6.03548	1.58493e-09	8.43182e-07	CD8_effector_VS_OTHER_CD8_CELLS
CD4	10.9632	2.27636	0.30192	5.74695	9.08698e-09	4.43142e-06	CD8_effector_VS_OTHER_CD8_CELLS
CD99	108.826	1.45046	0.159664	5.49556	3.89463e-08	1.75318e-05	CD8_effector_VS_OTHER_CD8_CELLS
CCR9	7.27841	-2.56161	0.38066	-5.37918	7.48238e-08	3.12764e-05	CD8_effector_VS_OTHER_CD8_CELLS
ADGRG1	74.0821	1.77485	0.390207	5.12691	2.94535e-07	0.000110275	CD8_effector_VS_OTHER_CD8_CELLS
CD69	44.7229	-1.84384	0.249029	-5.1225	3.01505e-07	0.000110275	CD8_effector_VS_OTHER_CD8_CELLS
CD200	4.53018	-2.54929	0.385772	-5.10503	3.30739e-07	0.000113852	CD8_effector_VS_OTHER_CD8_CELLS
HPSE	6.88962	-2.58806	0.37687	-5.09291	3.52608e-07	0.000114637	CD8_effector_VS_OTHER_CD8_CELLS
KLK7	7.84141	-2.37933	0.352148	-5.02354	5.07282e-07	0.000156243	CD8_effector_VS_OTHER_CD8_CELLS
FAM89A	9.74885	-2.48853	0.366283	-4.9994	5.75084e-07	0.000165009	CD8_effector_VS_OTHER_CD8_CELLS
ANGPT2	8.20661	-2.41194	0.383035	-4.99376	5.92138e-07	0.000165009	CD8_effector_VS_OTHER_CD8_CELLS
S100A6	428.175	1.50294	0.197529	4.90631	9.28045e-07	0.00024686	CD8_effector_VS_OTHER_CD8_CELLS
ID3	15.8204	-1.97144	0.316318	-4.89143	1.00105e-06	0.000254702	CD8_effector_VS_OTHER_CD8_CELLS
GMPR	6.28039	-2.35183	0.35993	-4.87572	1.0841e-06	0.000264339	CD8_effector_VS_OTHER_CD8_CELLS
ITM2C	143.548	1.73629	0.255069	4.86257	1.15871e-06	0.000271231	CD8_effector_VS_OTHER_CD8_CELLS
NKX3-1	5.49932	-2.4325	0.389347	-4.84668	1.25545e-06	0.000272108	CD8_effector_VS_OTHER_CD8_CELLS
RGS10	26.2256	-1.94956	0.29517	-4.8475	1.25025e-06	0.000272108	CD8_effector_VS_OTHER_CD8_CELLS
ENSSSCG00000035507	13.5336	-2.06096	0.407965	-4.81722	1.45571e-06	0.000304244	CD8_effector_VS_OTHER_CD8_CELLS
CERS6	5.17893	-2.50893	0.388941	-4.80329	1.56078e-06	0.000314955	CD8_effector_VS_OTHER_CD8_CELLS
GNLY	3285.56	1.1253	0.407461	4.7913	1.65703e-06	0.000323231	CD8_effector_VS_OTHER_CD8_CELLS
DAPL1	43.3542	-1.5065	0.203001	-4.68451	2.80627e-06	0.000529752	CD8_effector_VS_OTHER_CD8_CELLS
TMEM9	6.77737	-2.23087	0.350822	-4.64891	3.33694e-06	0.000610244	CD8_effector_VS_OTHER_CD8_CELLS
CD40LG	10.5734	1.98843	0.378999	4.64084	3.4699e-06	0.00061533	CD8_effector_VS_OTHER_CD8_CELLS
S100A11	208.229	1.6397	0.257918	4.6166	3.90071e-06	0.000671381	CD8_effector_VS_OTHER_CD8_CELLS
ADGRE5	54.2255	1.5175	0.208607	4.60239	4.17678e-06	0.000698357	CD8_effector_VS_OTHER_CD8_CELLS
EVL	110.519	-1.51159	0.212369	-4.5728	4.81247e-06	0.000782294	CD8_effector_VS_OTHER_CD8_CELLS
THY1	5.42798	-2.26536	0.368792	-4.54053	5.61126e-06	0.000887489	CD8_effector_VS_OTHER_CD8_CELLS
AOAH	30.2583	1.79416	0.318943	4.52862	5.93693e-06	0.000914287	CD8_effector_VS_OTHER_CD8_CELLS
TIAM1	6.17685	-2.25041	0.359297	-4.50369	6.67827e-06	0.000977031	CD8_effector_VS_OTHER_CD8_CELLS
RPS3A	2319.35	-0.99631	0.094194	-4.50861	6.52546e-06	0.000977031	CD8_effector_VS_OTHER_CD8_CELLS
ENSSSCG00000034617	2693.94	-0.878582	0.0673275	-4.49177	7.06331e-06	0.00100816	CD8_effector_VS_OTHER_CD8_CELLS
GOLIM4	7.70178	-2.28902	0.376472	-4.43833	9.06591e-06	0.00126318	CD8_effector_VS_OTHER_CD8_CELLS
TMEM123	122.463	-1.43825	0.200898	-4.42987	9.42883e-06	0.0012832	CD8_effector_VS_OTHER_CD8_CELLS
FAM171B	11.3852	-1.92814	0.314119	-4.42207	9.77592e-06	0.0013002	CD8_effector_VS_OTHER_CD8_CELLS
FAM83A	16.4582	1.73875	0.278706	4.39245	1.12081e-05	0.00143003	CD8_effector_VS_OTHER_CD8_CELLS
S100A4	524.21	1.46469	0.216228	4.39182	1.12408e-05	0.00143003	CD8_effector_VS_OTHER_CD8_CELLS
HSPE1	155.444	-1.08805	0.119415	-4.36056	1.2973e-05	0.00161527	CD8_effector_VS_OTHER_CD8_CELLS
S1PR5	32.3075	1.58953	0.404642	4.33303	1.47069e-05	0.00179302	CD8_effector_VS_OTHER_CD8_CELLS
ZNF683	43.1197	1.74328	0.312342	4.32813	1.50379e-05	0.00179595	CD8_effector_VS_OTHER_CD8_CELLS
KLRK1	163.495	1.77268	0.35846	4.31268	1.61288e-05	0.00188772	CD8_effector_VS_OTHER_CD8_CELLS
TMIGD2	3.58787	-2.11027	0.398124	-4.15359	3.27298e-05	0.00371658	CD8_effector_VS_OTHER_CD8_CELLS
TC2N	2.55542	-2.03219	0.405045	-4.15154	3.3025e-05	0.00371658	CD8_effector_VS_OTHER_CD8_CELLS
NKG7	410.493	1.39162	0.224236	4.10222	4.092e-05	0.00451819	CD8_effector_VS_OTHER_CD8_CELLS
ZEB2	25.7617	1.76187	0.355342	4.07707	4.56062e-05	0.00494236	CD8_effector_VS_OTHER_CD8_CELLS
TESC	37.0555	1.66347	0.329938	4.05346	5.04651e-05	0.00536948	CD8_effector_VS_OTHER_CD8_CELLS
SPOCK2	18.039	-1.74704	0.297033	-4.02682	5.65354e-05	0.00590795	CD8_effector_VS_OTHER_CD8_CELLS
LTBP1	3.05286	-2.04781	0.404423	-3.94626	7.93809e-05	0.00800926	CD8_effector_VS_OTHER_CD8_CELLS
CD244	22.6334	1.53465	0.404376	3.94982	7.821e-05	0.00800926	CD8_effector_VS_OTHER_CD8_CELLS
EMP1	6.47241	1.84564	0.377908	3.93896	8.18343e-05	0.00811685	CD8_effector_VS_OTHER_CD8_CELLS
PPIF	6.97097	-1.91915	0.368902	-3.92345	8.72893e-05	0.00837405	CD8_effector_VS_OTHER_CD8_CELLS
BATF	81.1827	1.58678	0.296046	3.92644	8.62109e-05	0.00837405	CD8_effector_VS_OTHER_CD8_CELLS
DAPK2	22.9345	1.65521	0.332405	3.91632	8.99125e-05	0.00848658	CD8_effector_VS_OTHER_CD8_CELLS
ENSSSCG00000008898	61.2984	1.48613	0.269352	3.89943	9.64203e-05	0.00881643	CD8_effector_VS_OTHER_CD8_CELLS
ENSSSCG00000033697	911.368	-1.18534	0.165238	-3.90004	9.61785e-05	0.00881643	CD8_effector_VS_OTHER_CD8_CELLS
ZBTB18	6.45028	-1.97771	0.35174	-3.8801	0.000104416	0.00940062	CD8_effector_VS_OTHER_CD8_CELLS
CX3CR1	57.0058	1.29967	0.407642	3.87409	0.000107023	0.00948936	CD8_effector_VS_OTHER_CD8_CELLS
ENSSSCG00000005453	161.68	1.33475	0.214221	3.85311	0.000116629	0.0101868	CD8_effector_VS_OTHER_CD8_CELLS
LDLRAP1	14.0384	-1.58003	0.269028	-3.83989	0.000123089	0.0104746	CD8_effector_VS_OTHER_CD8_CELLS
TBX21	29.4735	1.67531	0.32967	3.83906	0.000123504	0.0104746	CD8_effector_VS_OTHER_CD8_CELLS
GADD45A	7.38827	-1.80429	0.353993	-3.81763	0.000134739	0.0112642	CD8_effector_VS_OTHER_CD8_CELLS
NPM3	11.9257	-1.55229	0.270391	-3.76023	0.000169754	0.0139916	CD8_effector_VS_OTHER_CD8_CELLS
SPTBN1	26.0339	-1.54502	0.262327	-3.75587	0.000172742	0.0140401	CD8_effector_VS_OTHER_CD8_CELLS
LY75	3.6883	-1.98354	0.396408	-3.70021	0.000215422	0.0172391	CD8_effector_VS_OTHER_CD8_CELLS
CCL5	4750.04	1.18586	0.396759	3.6972	0.000217992	0.0172391	CD8_effector_VS_OTHER_CD8_CELLS
IRAK2	6.78907	1.70459	0.33886	3.67074	0.000241848	0.0188706	CD8_effector_VS_OTHER_CD8_CELLS
CDC42EP3	34.6401	1.40548	0.229467	3.6513	0.000260912	0.0199061	CD8_effector_VS_OTHER_CD8_CELLS
SKAP2	13.9446	1.58162	0.358775	3.65031	0.000261923	0.0199061	CD8_effector_VS_OTHER_CD8_CELLS
ANXA5	17.7204	1.54823	0.286592	3.62257	0.000291695	0.0218846	CD8_effector_VS_OTHER_CD8_CELLS
ENSSSCG00000020777	67.2071	1.26194	0.198399	3.60273	0.00031489	0.0233258	CD8_effector_VS_OTHER_CD8_CELLS
ENSSSCG00000037142	691.959	1.18395	0.178187	3.59475	0.000324707	0.0237523	CD8_effector_VS_OTHER_CD8_CELLS
ENSSSCG00000036622	10.0379	-1.64849	0.303858	-3.5763	0.000348496	0.0251778	CD8_effector_VS_OTHER_CD8_CELLS
DUSP16	2.32259	-1.77808	0.404975	-3.54705	0.000389576	0.0278024	CD8_effector_VS_OTHER_CD8_CELLS
ENSSSCG00000027232	2.55939	-1.78264	0.404771	-3.52594	0.000421988	0.0297527	CD8_effector_VS_OTHER_CD8_CELLS
MFSD6	11.9634	-1.63682	0.301994	-3.51652	0.000437245	0.0304614	CD8_effector_VS_OTHER_CD8_CELLS
ENSSSCG00000009239	6.30715	-1.89094	0.355539	-3.50675	0.000453609	0.0312296	CD8_effector_VS_OTHER_CD8_CELLS
GLUL	7.39853	1.71858	0.334441	3.49336	0.00047699	0.0324575	CD8_effector_VS_OTHER_CD8_CELLS
RDX	165.728	1.16752	0.177456	3.4881	0.00048646	0.0327214	CD8_effector_VS_OTHER_CD8_CELLS
IL2RB	47.1452	1.42697	0.317921	3.47893	0.000503424	0.0334777	CD8_effector_VS_OTHER_CD8_CELLS
IGFBP2	4.90342	-1.83257	0.366595	-3.47177	0.000517042	0.0339882	CD8_effector_VS_OTHER_CD8_CELLS
RHOQ	16.4516	1.45984	0.359698	3.46884	0.000522717	0.0339882	CD8_effector_VS_OTHER_CD8_CELLS
LPCAT2	24.6185	1.48955	0.273515	3.44731	0.000566197	0.0364108	CD8_effector_VS_OTHER_CD8_CELLS
FCMR	11.2543	-1.63486	0.340893	-3.44291	0.000575482	0.0366056	CD8_effector_VS_OTHER_CD8_CELLS
GZMK	38.7081	-1.41779	0.269553	-3.41101	0.000647236	0.0407271	CD8_effector_VS_OTHER_CD8_CELLS
ENSSSCG00000003042	2804.85	-0.976103	0.121163	-3.38268	0.000717833	0.0442185	CD8_effector_VS_OTHER_CD8_CELLS
ADAM15	4.62956	1.7869	0.350475	3.38429	0.000713615	0.0442185	CD8_effector_VS_OTHER_CD8_CELLS
ENSSSCG00000016903	190.371	0.987869	0.372883	3.3526	0.000800562	0.0488009	CD8_effector_VS_OTHER_CD8_CELLS
CCR7	129.087	-3.25211	0.285477	-8.42547	3.5929e-17	2.10149e-13	CD8_terminal_effector_VS_OTHER_CD8_CELLS
SELL	141.626	-2.25092	0.257968	-6.31132	2.76658e-10	8.09087e-07	CD8_terminal_effector_VS_OTHER_CD8_CELLS
FADS3	36.9746	-2.6027	0.294107	-6.19967	5.65807e-10	1.10314e-06	CD8_terminal_effector_VS_OTHER_CD8_CELLS
PDK1	70.9566	-2.34308	0.288485	-5.84326	5.11877e-09	7.48493e-06	CD8_terminal_effector_VS_OTHER_CD8_CELLS
PLAC8	956.533	-1.74661	0.211635	-5.61602	1.95409e-08	2.2859e-05	CD8_terminal_effector_VS_OTHER_CD8_CELLS
LEF1	105.408	-2.03295	0.272918	-5.25018	1.51948e-07	0.000148124	CD8_terminal_effector_VS_OTHER_CD8_CELLS
CCR9	14.1523	-2.01854	0.299838	-5.21623	1.826e-07	0.000152575	CD8_terminal_effector_VS_OTHER_CD8_CELLS
RGS10	45.4409	-1.95351	0.277035	-5.11799	3.08804e-07	0.000225775	CD8_terminal_effector_VS_OTHER_CD8_CELLS
LIX1	16.5711	-2.1485	0.302343	-4.74331	2.10259e-06	0.00136645	CD8_terminal_effector_VS_OTHER_CD8_CELLS
ENSSSCG00000035507	24.2043	-2.08593	0.30117	-4.61855	3.86427e-06	0.00226021	CD8_terminal_effector_VS_OTHER_CD8_CELLS
ANGPT2	13.9051	-1.8895	0.301333	-4.5834	4.57465e-06	0.00243247	CD8_terminal_effector_VS_OTHER_CD8_CELLS
DUT	144.479	1.65961	0.232121	4.49129	7.07937e-06	0.00318517	CD8_terminal_effector_VS_OTHER_CD8_CELLS
DAPL1	73.8855	-1.7037	0.260631	-4.50612	6.60231e-06	0.00318517	CD8_terminal_effector_VS_OTHER_CD8_CELLS
EVL	180.746	-1.67281	0.264509	-4.4714	7.77078e-06	0.00324652	CD8_terminal_effector_VS_OTHER_CD8_CELLS
TMEM123	191.26	-1.61329	0.235376	-4.37057	1.23924e-05	0.00483221	CD8_terminal_effector_VS_OTHER_CD8_CELLS
TPM2	52.117	-1.85901	0.29348	-4.26454	2.00314e-05	0.00732271	CD8_terminal_effector_VS_OTHER_CD8_CELLS
ID3	25.3785	-1.72276	0.295616	-4.24471	2.18874e-05	0.00753054	CD8_terminal_effector_VS_OTHER_CD8_CELLS
FAM171B	17.3211	-1.68435	0.299441	-4.03652	5.42497e-05	0.0176281	CD8_terminal_effector_VS_OTHER_CD8_CELLS
GOLIM4	14.8963	-1.68065	0.300982	-3.93467	8.33122e-05	0.025647	CD8_terminal_effector_VS_OTHER_CD8_CELLS
KLK7	12.7594	-1.57998	0.30032	-3.87273	0.000107623	0.0314745	CD8_terminal_effector_VS_OTHER_CD8_CELLS
CD200	9.06651	-1.50891	0.300131	-3.77709	0.000158669	0.044193	CD8_terminal_effector_VS_OTHER_CD8_CELLS
