# Supplementary material for: Single-Cell RNA-Sequencing Reveals Heterogeneity and Transcriptional Dynamics in Porcine Circulating CD8+ T Cells
Source: Cells. 2024 Apr 16;13(8):692. doi: 10.3390/cells13080692 (PMC11049515; doi:10.3390/cells13080692)
Supplement: Supplementary file 1 [file cells-13-00692-s001.zip › Supplemental Table2.xlsx]

## Sheet: Sheet1
Supplemental Table S2. Differentially expressed genes between CD4+ T cell subtypes and γδ cell T subtypes
gene	baseMean	log2FoldChange	lfcSE	stat	pvalue	padj	gs_base
S100A6	336.335	-3.21931	0.105232	-24.9698	1.30077e-137	6.59101e-134	CD4_NAIVE_VS_CD4_TEM
GPX1	582.574	-2.59811	0.100822	-20.1797	1.47718e-90	3.74243e-87	CD4_NAIVE_VS_CD4_TEM
ITGB1	174.033	-3.23601	0.162821	-16.2276	3.21786e-59	5.43497e-56	CD4_NAIVE_VS_CD4_TEM
ENSSSCG00000037142	728.877	-2.02268	0.0936581	-15.4948	3.76418e-54	4.76828e-51	CD4_NAIVE_VS_CD4_TEM
UCP2	155.355	-2.29803	0.121332	-14.1626	1.56027e-45	1.58118e-42	CD4_NAIVE_VS_CD4_TEM
ANXA2	91.4054	-2.55331	0.140883	-13.9027	6.09955e-44	5.15107e-41	CD4_NAIVE_VS_CD4_TEM
ENSSSCG00000026140	149.101	1.9396	0.10122	13.5541	7.49038e-42	5.42196e-39	CD4_NAIVE_VS_CD4_TEM
ENSSSCG00000036013	52.5182	2.7701	0.166613	13.1146	2.71459e-39	1.71935e-36	CD4_NAIVE_VS_CD4_TEM
ENSSSCG00000035507	30.3281	3.77699	0.239863	12.3658	4.00052e-35	2.25229e-32	CD4_NAIVE_VS_CD4_TEM
S100A11	176.532	-3.28611	0.223715	-12.2524	1.63116e-34	8.26508e-32	CD4_NAIVE_VS_CD4_TEM
S100A10	479.022	-1.63081	0.090659	-11.7017	1.24919e-31	5.75423e-29	CD4_NAIVE_VS_CD4_TEM
ENSSSCG00000036618	706.703	-3.00033	0.226479	-11.1812	5.03803e-29	2.12731e-26	CD4_NAIVE_VS_CD4_TEM
ANGPT2	28.7209	3.25788	0.244504	10.5285	6.38774e-26	2.48974e-23	CD4_NAIVE_VS_CD4_TEM
SELL	200.474	1.51657	0.0913675	10.3586	3.82452e-25	1.3842e-22	CD4_NAIVE_VS_CD4_TEM
CD99	74.2061	-2.25549	0.162658	-10.3237	5.50612e-25	1.85997e-22	CD4_NAIVE_VS_CD4_TEM
RGS10	94.3324	1.7096	0.112622	10.1271	4.18719e-24	1.32603e-21	CD4_NAIVE_VS_CD4_TEM
CCR4	31.0991	-3.71428	0.280334	-10.0525	8.95792e-24	2.66999e-21	CD4_NAIVE_VS_CD4_TEM
IL18R1	41.5002	-3.05492	0.246128	-9.88356	4.90584e-23	1.38099e-20	CD4_NAIVE_VS_CD4_TEM
CCR7	336.689	1.36099	0.0812664	9.70747	2.80197e-22	7.4724e-20	CD4_NAIVE_VS_CD4_TEM
GADD45A	30.3522	2.60054	0.216614	9.2992	1.41503e-20	3.58497e-18	CD4_NAIVE_VS_CD4_TEM
EML4	86.5098	-1.85158	0.140367	-9.18797	4.00306e-20	9.65881e-18	CD4_NAIVE_VS_CD4_TEM
CD74	305.674	-1.7732	0.134576	-9.05647	1.34741e-19	3.10333e-17	CD4_NAIVE_VS_CD4_TEM
ENSSSCG00000006395	208.356	-1.4118	0.0958121	-8.75525	2.03654e-18	4.4866e-16	CD4_NAIVE_VS_CD4_TEM
F2R	20.0639	-3.70183	0.293821	-8.70462	3.18645e-18	6.72739e-16	CD4_NAIVE_VS_CD4_TEM
VMP1	102.629	-1.94969	0.162567	-8.51581	1.65434e-17	3.35301e-15	CD4_NAIVE_VS_CD4_TEM
ENSSSCG00000038351	28.9306	-2.90222	0.270388	-8.40585	4.24758e-17	8.27789e-15	CD4_NAIVE_VS_CD4_TEM
CXCR3	23.7495	-2.9336	0.273694	-8.27598	1.274e-16	2.39088e-14	CD4_NAIVE_VS_CD4_TEM
IFI6	403.968	-1.48053	0.122415	-7.79666	6.35652e-15	1.14312e-12	CD4_NAIVE_VS_CD4_TEM
CD9	29.3777	-2.40759	0.234332	-7.79302	6.5424e-15	1.14312e-12	CD4_NAIVE_VS_CD4_TEM
AQP3	18.0437	-3.10747	0.287743	-7.71126	1.24578e-14	2.10413e-12	CD4_NAIVE_VS_CD4_TEM
MT3	20.4334	-3.35959	0.306767	-7.69126	1.45696e-14	2.38143e-12	CD4_NAIVE_VS_CD4_TEM
MYO1F	25.9209	-2.40623	0.240417	-7.62202	2.49728e-14	3.95428e-12	CD4_NAIVE_VS_CD4_TEM
LEF1	202.51	1.32884	0.102702	7.41144	1.24932e-13	1.91828e-11	CD4_NAIVE_VS_CD4_TEM
CD40LG	71.0349	-1.58509	0.14238	-7.21902	5.23636e-13	7.80372e-11	CD4_NAIVE_VS_CD4_TEM
LGALS1	88.9105	-2.6976	0.313935	-7.21045	5.57671e-13	8.07349e-11	CD4_NAIVE_VS_CD4_TEM
SAMHD1	131.267	-1.45544	0.124118	-7.17916	7.01392e-13	9.87209e-11	CD4_NAIVE_VS_CD4_TEM
SRGN	763.759	-1.2535	0.0975639	-7.00774	2.4219e-12	3.31669e-10	CD4_NAIVE_VS_CD4_TEM
ENSSSCG00000030300	11.1133	-2.96935	0.312148	-6.80431	1.01534e-11	1.35388e-09	CD4_NAIVE_VS_CD4_TEM
ENSSSCG00000005453	136.117	-1.27586	0.104641	-6.77363	1.25592e-11	1.63173e-09	CD4_NAIVE_VS_CD4_TEM
BST2	53.5856	-2.33231	0.282323	-6.73012	1.69519e-11	2.14738e-09	CD4_NAIVE_VS_CD4_TEM
CGA	18.4201	-2.86016	0.312533	-6.6453	3.02594e-11	3.73962e-09	CD4_NAIVE_VS_CD4_TEM
IKZF2	33.4724	-2.10107	0.23926	-6.62804	3.40169e-11	4.1039e-09	CD4_NAIVE_VS_CD4_TEM
GZMK	9.67782	-2.98791	0.324974	-6.5524	5.66189e-11	6.67182e-09	CD4_NAIVE_VS_CD4_TEM
ENSSSCG00000001455	66.5242	-1.63663	0.166829	-6.47845	9.26713e-11	1.06719e-08	CD4_NAIVE_VS_CD4_TEM
KLK7	17.9551	2.08253	0.237705	6.47494	9.48503e-11	1.06801e-08	CD4_NAIVE_VS_CD4_TEM
NREP	9.77058	2.49395	0.292757	6.46897	9.86713e-11	1.08689e-08	CD4_NAIVE_VS_CD4_TEM
AHI1	40.9801	1.66186	0.17211	6.43186	1.26053e-10	1.35896e-08	CD4_NAIVE_VS_CD4_TEM
PLAAT3	13.4584	-2.62873	0.306324	-6.40497	1.50399e-10	1.58765e-08	CD4_NAIVE_VS_CD4_TEM
ENSSSCG00000015447	12.2933	-2.85021	0.330157	-6.37549	1.82373e-10	1.84817e-08	CD4_NAIVE_VS_CD4_TEM
GSTA4	49.7894	1.60379	0.165537	6.37625	1.81475e-10	1.84817e-08	CD4_NAIVE_VS_CD4_TEM
SOX4	7.62808	2.82696	0.331203	6.34543	2.21806e-10	2.2037e-08	CD4_NAIVE_VS_CD4_TEM
BEX3	7.3446	2.89843	0.32904	6.29335	3.10688e-10	3.02742e-08	CD4_NAIVE_VS_CD4_TEM
RALGPS2	25.2684	1.87303	0.216266	6.25995	3.85108e-10	3.68178e-08	CD4_NAIVE_VS_CD4_TEM
ENSSSCG00000037364	15.1243	2.24175	0.281517	6.14896	7.79912e-10	7.31818e-08	CD4_NAIVE_VS_CD4_TEM
CST7	80.7381	-1.55166	0.165941	-6.07615	1.23105e-09	1.13413e-07	CD4_NAIVE_VS_CD4_TEM
CD80	12.3887	-2.30131	0.295261	-6.04144	1.52745e-09	1.38207e-07	CD4_NAIVE_VS_CD4_TEM
ANGPTL1	21.8916	1.8122	0.215508	6.03586	1.58123e-09	1.40563e-07	CD4_NAIVE_VS_CD4_TEM
CARD19	39.2504	-1.68176	0.189889	-5.97819	2.25628e-09	1.97113e-07	CD4_NAIVE_VS_CD4_TEM
RDX	77.6799	-1.33702	0.130955	-5.96271	2.48085e-09	2.13059e-07	CD4_NAIVE_VS_CD4_TEM
SLA-DQB1	56.2112	-1.66013	0.187581	-5.95563	2.59078e-09	2.18791e-07	CD4_NAIVE_VS_CD4_TEM
MAF	14.4652	-2.30395	0.302618	-5.90165	3.59879e-09	2.98936e-07	CD4_NAIVE_VS_CD4_TEM
EMB	33.3479	-1.66528	0.192776	-5.88121	4.07271e-09	3.32845e-07	CD4_NAIVE_VS_CD4_TEM
DYRK2	27.8203	1.71102	0.199837	5.86729	4.42978e-09	3.56281e-07	CD4_NAIVE_VS_CD4_TEM
TMEM173	60.9698	-1.38858	0.141487	-5.82927	5.56715e-09	4.40762e-07	CD4_NAIVE_VS_CD4_TEM
C15orf48	20.5799	-2.32919	0.340763	-5.80026	6.62106e-09	5.16137e-07	CD4_NAIVE_VS_CD4_TEM
ENSSSCG00000029596	75.6607	-1.38152	0.143769	-5.68772	1.28748e-08	9.88436e-07	CD4_NAIVE_VS_CD4_TEM
ENSSSCG00000004666	23.1254	-1.87617	0.249413	-5.60512	2.08114e-08	1.5739e-06	CD4_NAIVE_VS_CD4_TEM
ZNF395	25.294	1.58093	0.187548	5.54318	2.97021e-08	2.21325e-06	CD4_NAIVE_VS_CD4_TEM
LY96	46.7788	-1.42443	0.15857	-5.51814	3.42603e-08	2.51589e-06	CD4_NAIVE_VS_CD4_TEM
OSTF1	115.14	-1.18456	0.112893	-5.473	4.42488e-08	3.20298e-06	CD4_NAIVE_VS_CD4_TEM
ANXA1	66.0181	-1.38804	0.154074	-5.42174	5.90225e-08	4.21221e-06	CD4_NAIVE_VS_CD4_TEM
TMSB10	7554.87	-0.906024	0.0611275	-5.40838	6.35961e-08	4.47557e-06	CD4_NAIVE_VS_CD4_TEM
NUPR1	5.75256	2.41131	0.33674	5.37601	7.61546e-08	5.28596e-06	CD4_NAIVE_VS_CD4_TEM
ENSSSCG00000033703	8.85978	-2.17846	0.318256	-5.37249	7.76562e-08	5.30094e-06	CD4_NAIVE_VS_CD4_TEM
ADGRL1	5.47357	2.59422	0.341054	5.37063	7.84627e-08	5.30094e-06	CD4_NAIVE_VS_CD4_TEM
RORA	45.6953	-1.42874	0.162822	-5.33461	9.57497e-08	6.38373e-06	CD4_NAIVE_VS_CD4_TEM
CD69	107.594	1.25799	0.132433	5.29381	1.19794e-07	7.88307e-06	CD4_NAIVE_VS_CD4_TEM
ADAM19	5.51518	-2.37864	0.338194	-5.28037	1.28923e-07	8.37501e-06	CD4_NAIVE_VS_CD4_TEM
CD86	18.0383	-1.75353	0.238616	-5.27521	1.32606e-07	8.50526e-06	CD4_NAIVE_VS_CD4_TEM
S100A4	495.753	-1.7609	0.294866	-5.23423	1.65675e-07	1.04935e-05	CD4_NAIVE_VS_CD4_TEM
SAT1	714.17	-0.986086	0.0799385	-5.1832	2.18108e-07	1.36438e-05	CD4_NAIVE_VS_CD4_TEM
IPO11	34.8903	1.4218	0.170279	5.15785	2.49805e-07	1.54361e-05	CD4_NAIVE_VS_CD4_TEM
ISG20	20.7458	-2.1555	0.336854	-5.13976	2.75088e-07	1.67936e-05	CD4_NAIVE_VS_CD4_TEM
C1orf21	5.71364	-2.29242	0.3398	-5.12612	2.95776e-07	1.78417e-05	CD4_NAIVE_VS_CD4_TEM
PLP2	62.2906	-1.4366	0.170622	-5.11925	3.06751e-07	1.8286e-05	CD4_NAIVE_VS_CD4_TEM
RORC	4.93652	-2.34215	0.344183	-5.11089	3.20644e-07	1.88919e-05	CD4_NAIVE_VS_CD4_TEM
SLC1A4	20.2587	1.60161	0.211017	5.10512	3.30582e-07	1.92536e-05	CD4_NAIVE_VS_CD4_TEM
FAM129A	9.17303	-2.20029	0.3083	-5.08515	3.67337e-07	2.11511e-05	CD4_NAIVE_VS_CD4_TEM
PLXND1	16.4407	-1.92171	0.282351	-5.04307	4.58133e-07	2.60827e-05	CD4_NAIVE_VS_CD4_TEM
SGCA	36.2465	1.37666	0.165728	5.01809	5.21881e-07	2.93819e-05	CD4_NAIVE_VS_CD4_TEM
ENSSSCG00000001456	55.2819	-1.39012	0.170337	-4.94223	7.72323e-07	4.3004e-05	CD4_NAIVE_VS_CD4_TEM
CCDC50	21.1126	-1.58257	0.212081	-4.89662	9.74991e-07	5.36987e-05	CD4_NAIVE_VS_CD4_TEM
FAM110D	5.77871	2.1167	0.329628	4.89329	9.91638e-07	5.40283e-05	CD4_NAIVE_VS_CD4_TEM
CLEC12A	13.7972	1.7128	0.23968	4.87495	1.08835e-06	5.86664e-05	CD4_NAIVE_VS_CD4_TEM
CCR2	4.54768	-2.13394	0.346731	-4.84819	1.24593e-06	6.64541e-05	CD4_NAIVE_VS_CD4_TEM
ENSSSCG00000020777	32.2443	-1.43208	0.179606	-4.84376	1.27403e-06	6.72448e-05	CD4_NAIVE_VS_CD4_TEM
MISP3	49.7065	-1.42025	0.183368	-4.80265	1.56578e-06	8.17919e-05	CD4_NAIVE_VS_CD4_TEM
ZBTB38	10.0533	-1.91406	0.296509	-4.78363	1.72158e-06	8.90128e-05	CD4_NAIVE_VS_CD4_TEM
IRF5	13.3091	-1.86156	0.281485	-4.75691	1.96577e-06	0.000100612	CD4_NAIVE_VS_CD4_TEM
SATB1	15.6164	1.62089	0.230503	4.74514	2.08362e-06	0.000105577	CD4_NAIVE_VS_CD4_TEM
FUT7	5.8414	-2.13755	0.332412	-4.73551	2.18505e-06	0.00010962	CD4_NAIVE_VS_CD4_TEM
DDIT4	36.976	1.38151	0.176104	4.71005	2.4766e-06	0.000123029	CD4_NAIVE_VS_CD4_TEM
MBNL3	18.9803	1.55173	0.221739	4.70208	2.57529e-06	0.000126689	CD4_NAIVE_VS_CD4_TEM
CTLA4	6.76965	-2.10057	0.330931	-4.69838	2.62233e-06	0.000127763	CD4_NAIVE_VS_CD4_TEM
HLA-DRA	90.3717	-1.64857	0.265311	-4.68348	2.82043e-06	0.000136106	CD4_NAIVE_VS_CD4_TEM
FAR2	6.1978	-2.0493	0.3233	-4.67251	2.97536e-06	0.000142228	CD4_NAIVE_VS_CD4_TEM
MNDA	53.3251	1.3402	0.173308	4.61861	3.86318e-06	0.000182942	CD4_NAIVE_VS_CD4_TEM
BATF	26.2894	-1.4493	0.208736	-4.53532	5.75175e-06	0.000269853	CD4_NAIVE_VS_CD4_TEM
AHR	9.6392	-1.84606	0.301575	-4.52312	6.09339e-06	0.000283259	CD4_NAIVE_VS_CD4_TEM
FADS3	71.2472	1.13592	0.127119	4.51574	6.30957e-06	0.000290642	CD4_NAIVE_VS_CD4_TEM
TPMT	4.30292	-1.98518	0.343813	-4.4746	7.65544e-06	0.00034946	CD4_NAIVE_VS_CD4_TEM
GCNT4	20.4734	1.43541	0.199348	4.45868	8.2467e-06	0.00037309	CD4_NAIVE_VS_CD4_TEM
ZNRF1	75.2034	-1.14047	0.130038	-4.44062	8.96984e-06	0.000402214	CD4_NAIVE_VS_CD4_TEM
KDM1B	12.6625	-1.68447	0.260856	-4.42227	9.767e-06	0.000434118	CD4_NAIVE_VS_CD4_TEM
VIM	215.141	-1.01382	0.100724	-4.40793	1.04362e-05	0.000459827	CD4_NAIVE_VS_CD4_TEM
HMGB2	142.516	-1.05578	0.112435	-4.3643	1.27529e-05	0.000557058	CD4_NAIVE_VS_CD4_TEM
CHD7	18.0895	1.5089	0.225636	4.35151	1.35204e-05	0.000585537	CD4_NAIVE_VS_CD4_TEM
NRP1	3.67841	-1.97103	0.349326	-4.31402	1.60312e-05	0.00068839	CD4_NAIVE_VS_CD4_TEM
AKAP7	40.7634	1.21185	0.15553	4.28332	1.84123e-05	0.000783995	CD4_NAIVE_VS_CD4_TEM
GLIPR2	113.578	-1.07413	0.120901	-4.27973	1.87124e-05	0.000790131	CD4_NAIVE_VS_CD4_TEM
DPP4	5.18134	-1.94051	0.338697	-4.24136	2.22165e-05	0.00093034	CD4_NAIVE_VS_CD4_TEM
S100A13	158.946	-0.960789	0.0930184	-4.19717	2.70268e-05	0.0011225	CD4_NAIVE_VS_CD4_TEM
LCN2	22.4997	1.41503	0.219087	4.18216	2.88751e-05	0.00118951	CD4_NAIVE_VS_CD4_TEM
SMC4	132.039	1.08208	0.124963	4.17107	3.03177e-05	0.00123887	CD4_NAIVE_VS_CD4_TEM
NDFIP2	148.41	-0.970427	0.0959374	-4.12841	3.65286e-05	0.00148072	CD4_NAIVE_VS_CD4_TEM
IL2RB	16.0227	-1.50562	0.239637	-4.11391	3.89005e-05	0.00156436	CD4_NAIVE_VS_CD4_TEM
MTSS1	19.6972	1.36676	0.206322	4.10537	4.03674e-05	0.00161057	CD4_NAIVE_VS_CD4_TEM
SUSD3	138.536	-0.97998	0.100097	-4.0927	4.26386e-05	0.00168789	CD4_NAIVE_VS_CD4_TEM
PTPN4	11.6447	-1.57827	0.269553	-4.08042	4.49543e-05	0.00175597	CD4_NAIVE_VS_CD4_TEM
ITGA4	121.717	-1.02684	0.113834	-4.07992	4.50516e-05	0.00175597	CD4_NAIVE_VS_CD4_TEM
ZNF827	15.96	1.43175	0.221478	4.04288	5.27994e-05	0.00204225	CD4_NAIVE_VS_CD4_TEM
B4GALNT1	4.98955	-1.99402	0.342356	-4.03451	5.47156e-05	0.00210033	CD4_NAIVE_VS_CD4_TEM
ENSSSCG00000011234	47.2973	-1.24599	0.173112	-3.99635	6.43261e-05	0.00245068	CD4_NAIVE_VS_CD4_TEM
BPGM	8.58696	-1.64893	0.296372	-3.97781	6.95531e-05	0.00263004	CD4_NAIVE_VS_CD4_TEM
ENSSSCG00000036626	16.8393	-1.28503	0.331309	-3.91967	8.86714e-05	0.00332813	CD4_NAIVE_VS_CD4_TEM
RHOC	9.45577	-1.64099	0.285199	-3.90913	9.26295e-05	0.00342633	CD4_NAIVE_VS_CD4_TEM
UPP1	5.85024	-1.78591	0.332544	-3.9091	9.26402e-05	0.00342633	CD4_NAIVE_VS_CD4_TEM
CD8A	38.7312	-1.3724	0.222473	-3.88414	0.000102691	0.00377055	CD4_NAIVE_VS_CD4_TEM
TIAM1	30.4622	1.2975	0.200209	3.88036	0.000104304	0.00378507	CD4_NAIVE_VS_CD4_TEM
FAS	13.222	-1.47888	0.249285	-3.87971	0.000104581	0.00378507	CD4_NAIVE_VS_CD4_TEM
ARL4A	6.78628	-1.74003	0.326123	-3.86757	0.000109925	0.00395027	CD4_NAIVE_VS_CD4_TEM
TMEM9	23.3167	1.3363	0.219425	3.83417	0.000125988	0.00449564	CD4_NAIVE_VS_CD4_TEM
LMO4	67.9335	1.01359	0.117394	3.83143	0.000127402	0.00451429	CD4_NAIVE_VS_CD4_TEM
NOL9	30.9655	1.20953	0.175519	3.81994	0.000133482	0.00469688	CD4_NAIVE_VS_CD4_TEM
ICOS	25.5588	-1.28646	0.197356	-3.80241	0.000143294	0.00499236	CD4_NAIVE_VS_CD4_TEM
ENSSSCG00000039071	249.156	-0.864772	0.0766286	-3.80145	0.000143849	0.00499236	CD4_NAIVE_VS_CD4_TEM
CERS6	5.39964	1.68284	0.328414	3.78962	0.000150875	0.00520058	CD4_NAIVE_VS_CD4_TEM
DHRS7	7.77359	-1.74477	0.329726	-3.78582	0.000153203	0.00524513	CD4_NAIVE_VS_CD4_TEM
TPM4	54.6756	-1.0656	0.136615	-3.76879	0.000164039	0.00554124	CD4_NAIVE_VS_CD4_TEM
ENSSSCG00000037775	102.589	-1.05848	0.133184	-3.76935	0.000163674	0.00554124	CD4_NAIVE_VS_CD4_TEM
SKIL	26.4248	1.29004	0.19235	3.76429	0.000167025	0.00557288	CD4_NAIVE_VS_CD4_TEM
ANXA5	9.01278	-1.61923	0.298353	-3.76406	0.000167175	0.00557288	CD4_NAIVE_VS_CD4_TEM
ENSSSCG00000024973	157.549	-0.959014	0.10534	-3.7624	0.000168294	0.00557349	CD4_NAIVE_VS_CD4_TEM
GPR183	96.1542	-1.00536	0.118207	-3.75176	0.000175595	0.00577754	CD4_NAIVE_VS_CD4_TEM
TIGIT	2.81863	-1.61398	0.351568	-3.7476	0.000178536	0.00583641	CD4_NAIVE_VS_CD4_TEM
ITM2A	3.20334	-1.68858	0.350048	-3.70322	0.00021288	0.00691452	CD4_NAIVE_VS_CD4_TEM
MCOLN2	9.56164	1.53726	0.282107	3.68103	0.000232298	0.00749716	CD4_NAIVE_VS_CD4_TEM
TNFRSF1B	13.0789	-1.4273	0.251173	-3.67359	0.000239165	0.00766993	CD4_NAIVE_VS_CD4_TEM
PARVG	50.8993	-1.12444	0.155698	-3.6505	0.000261734	0.00834093	CD4_NAIVE_VS_CD4_TEM
FLNA	44.4328	-1.12409	0.157077	-3.63028	0.00028311	0.00896573	CD4_NAIVE_VS_CD4_TEM
CENPF	5.79921	-1.57049	0.315639	-3.59063	0.000329873	0.0103177	CD4_NAIVE_VS_CD4_TEM
GOLPH3L	28.6973	-1.20293	0.181194	-3.59076	0.000329715	0.0103177	CD4_NAIVE_VS_CD4_TEM
TBXA2R	6.66931	1.54805	0.296278	3.58632	0.000335372	0.0104253	CD4_NAIVE_VS_CD4_TEM
HK3	7.31845	-1.57626	0.329406	-3.57448	0.000350925	0.0108423	CD4_NAIVE_VS_CD4_TEM
COQ8B	19.335	1.30091	0.222262	3.56316	0.000366415	0.0112295	CD4_NAIVE_VS_CD4_TEM
MCUB	17.0683	-1.34317	0.228148	-3.56211	0.000367891	0.0112295	CD4_NAIVE_VS_CD4_TEM
NKX3-1	21.6726	1.31538	0.229221	3.54949	0.000385972	0.0117109	CD4_NAIVE_VS_CD4_TEM
LTB	651.621	-0.843673	0.0762296	-3.54019	0.000399833	0.0120592	CD4_NAIVE_VS_CD4_TEM
ASPH	8.45666	1.50418	0.292045	3.53536	0.000407223	0.0122095	CD4_NAIVE_VS_CD4_TEM
CPD	9.07181	-1.47938	0.295069	-3.49296	0.000477696	0.0142382	CD4_NAIVE_VS_CD4_TEM
TSPO	144.272	-0.936566	0.105744	-3.4622	0.000535774	0.0158758	CD4_NAIVE_VS_CD4_TEM
DECR1	5.25414	-1.59262	0.333713	-3.44415	0.000572868	0.0168763	CD4_NAIVE_VS_CD4_TEM
ENSSSCG00000009926	23.4758	1.19572	0.192872	3.42011	0.000625955	0.0183238	CD4_NAIVE_VS_CD4_TEM
NPL	17.8801	-1.29263	0.253471	-3.41869	0.000629235	0.0183238	CD4_NAIVE_VS_CD4_TEM
TBK1	4.65415	-1.62845	0.335286	-3.40628	0.000658548	0.0190678	CD4_NAIVE_VS_CD4_TEM
LCORL	6.94752	1.47049	0.295653	3.3933	0.000690565	0.0198812	CD4_NAIVE_VS_CD4_TEM
LAG3	3.4484	-1.53597	0.349918	-3.34946	0.000809696	0.0231793	CD4_NAIVE_VS_CD4_TEM
DAAM1	6.12112	-1.47954	0.315262	-3.32467	0.000885243	0.0251996	CD4_NAIVE_VS_CD4_TEM
IL6R	103.173	-0.932578	0.111905	-3.31382	0.000920291	0.0260509	CD4_NAIVE_VS_CD4_TEM
NUAK2	16.7583	1.26416	0.222372	3.30488	0.00095016	0.026747	CD4_NAIVE_VS_CD4_TEM
LAX1	33.6102	-1.1196	0.182918	-3.29985	0.000967379	0.0270813	CD4_NAIVE_VS_CD4_TEM
TMEM232	9.1373	1.45018	0.313882	3.24847	0.00116028	0.0323031	CD4_NAIVE_VS_CD4_TEM
SRPK2	49.3102	1.0175	0.141565	3.23517	0.00121569	0.0336607	CD4_NAIVE_VS_CD4_TEM
VCL	13.7846	-1.31766	0.257544	-3.20786	0.00133727	0.0368258	CD4_NAIVE_VS_CD4_TEM
ZBTB20	24.3516	1.11925	0.179899	3.19597	0.0013936	0.0381697	CD4_NAIVE_VS_CD4_TEM
ID2	174.739	0.879369	0.0980938	3.17505	0.00149812	0.0408117	CD4_NAIVE_VS_CD4_TEM
SPC24	4.36875	-1.50221	0.34186	-3.16868	0.00153131	0.0414926	CD4_NAIVE_VS_CD4_TEM
MAP4K4	13.6247	1.24992	0.232892	3.16645	0.00154311	0.0415901	CD4_NAIVE_VS_CD4_TEM
PRXL2A	14.0628	1.24615	0.24285	3.15372	0.00161203	0.0432176	CD4_NAIVE_VS_CD4_TEM
SMAP1	64.8928	-1.00126	0.141021	-3.14365	0.00166854	0.0444972	CD4_NAIVE_VS_CD4_TEM
RETNLB	4.821	-1.50661	0.336789	-3.12635	0.00176989	0.046953	CD4_NAIVE_VS_CD4_TEM
FOXP3	3.23497	-1.46946	0.348219	-3.1094	0.00187467	0.0494738	CD4_NAIVE_VS_CD4_TEM
IL2RA	10.6758	-1.36209	0.28361	-3.10666	0.00189216	0.0496767	CD4_NAIVE_VS_CD4_TEM
LCK	126.087	-4.27703	0.197032	-18.6253	2.00254e-77	1.05854e-73	CD2-gd_T_cell vs CD2+gd_T_cell
TOX	37.8824	-5.29255	0.273805	-15.9717	2.01303e-57	5.32044e-54	CD2-gd_T_cell vs CD2+gd_T_cell
SRGN	894.064	2.69716	0.134753	15.8044	2.90281e-56	5.11476e-53	CD2-gd_T_cell vs CD2+gd_T_cell
CD2	86.97	-4.36665	0.240734	-15.5428	1.77989e-54	2.35213e-51	CD2-gd_T_cell vs CD2+gd_T_cell
ENSSSCG00000013260	55.8391	-7.06254	0.340087	-15.3	7.65017e-53	8.08776e-50	CD2-gd_T_cell vs CD2+gd_T_cell
FCRL6	37.1301	-5.70912	0.304725	-15.0644	2.77737e-51	2.44686e-48	CD2-gd_T_cell vs CD2+gd_T_cell
NPY	75.5338	-7.59412	0.379241	-13.8583	1.13404e-43	8.56358e-41	CD2-gd_T_cell vs CD2+gd_T_cell
S100A11	134.868	2.98052	0.175907	13.6073	3.62604e-42	2.39591e-39	CD2-gd_T_cell vs CD2+gd_T_cell
FSCN1	30.2145	-4.91248	0.304429	-13.4043	5.70753e-41	3.35222e-38	CD2-gd_T_cell vs CD2+gd_T_cell
TRAT1	69.1679	-3.29148	0.219658	-12.4082	2.35764e-35	1.24625e-32	CD2-gd_T_cell vs CD2+gd_T_cell
CAPG	185.688	2.10097	0.124369	12.2633	1.42579e-34	6.85158e-32	CD2-gd_T_cell vs CD2+gd_T_cell
IKZF2	67.4341	-3.33406	0.226598	-12.1665	4.68896e-34	1.94423e-31	CD2-gd_T_cell vs CD2+gd_T_cell
LGALS1	277.026	4.16512	0.296057	12.1649	4.78149e-34	1.94423e-31	CD2-gd_T_cell vs CD2+gd_T_cell
ANXA1	170.29	2.56545	0.165198	11.9952	3.76717e-33	1.42237e-30	CD2-gd_T_cell vs CD2+gd_T_cell
EOMES	23.5916	-5.97437	0.398973	-11.7166	1.0479e-31	3.69281e-29	CD2-gd_T_cell vs CD2+gd_T_cell
S100A6	265.086	1.98917	0.121494	11.6346	2.74749e-31	9.07702e-29	CD2-gd_T_cell vs CD2+gd_T_cell
PLAC8	576.446	-1.44604	0.0754043	-11.5227	1.0136e-30	3.1517e-28	CD2-gd_T_cell vs CD2+gd_T_cell
SMC4	62.4219	-2.29199	0.15015	-11.4343	2.81686e-30	8.27217e-28	CD2-gd_T_cell vs CD2+gd_T_cell
ARHGAP5	20.7496	-5.177	0.354361	-11.3937	4.49722e-30	1.25117e-27	CD2-gd_T_cell vs CD2+gd_T_cell
XCL1	17.7485	-4.59427	0.335286	-11.3648	6.2595e-30	1.65439e-27	CD2-gd_T_cell vs CD2+gd_T_cell
KIT	26.0146	-4.57976	0.331644	-11.2091	3.67958e-29	9.26204e-27	CD2-gd_T_cell vs CD2+gd_T_cell
ENSSSCG00000023584	242.903	-2.1331	0.142432	-10.9443	7.07353e-28	1.69958e-25	CD2-gd_T_cell vs CD2+gd_T_cell
ENSSSCG00000000635	46.4922	-2.69687	0.19964	-10.6331	2.09042e-26	4.80433e-24	CD2-gd_T_cell vs CD2+gd_T_cell
ENSSSCG00000026217	16.9575	-4.29543	0.326436	-10.5088	7.8662e-26	1.73253e-23	CD2-gd_T_cell vs CD2+gd_T_cell
CAMK4	39.6084	-3.37499	0.270454	-10.4337	1.73995e-25	3.67894e-23	CD2-gd_T_cell vs CD2+gd_T_cell
ITGA4	68.0633	-1.99784	0.146358	-9.76244	1.63189e-22	3.31775e-20	CD2-gd_T_cell vs CD2+gd_T_cell
NREP	13.8053	-4.46079	0.359798	-9.7323	2.19577e-22	4.29883e-20	CD2-gd_T_cell vs CD2+gd_T_cell
SAMSN1	71.6539	2.81193	0.233455	9.54425	1.3709e-21	2.58807e-19	CD2-gd_T_cell vs CD2+gd_T_cell
TST	10.4898	-5.03238	0.428529	-9.50426	2.01469e-21	3.67229e-19	CD2-gd_T_cell vs CD2+gd_T_cell
ENSSSCG00000008032	66.64	-2.81151	0.242199	-9.43038	4.08613e-21	7.19976e-19	CD2-gd_T_cell vs CD2+gd_T_cell
ENSSSCG00000032017	667.259	3.94935	0.415215	9.33378	1.02157e-20	1.74194e-18	CD2-gd_T_cell vs CD2+gd_T_cell
RHEX	358.8	3.89388	0.408567	9.03342	1.66384e-19	2.74846e-17	CD2-gd_T_cell vs CD2+gd_T_cell
HES1	17.6854	-3.42661	0.312045	-8.89099	6.05683e-19	9.70194e-17	CD2-gd_T_cell vs CD2+gd_T_cell
ENSSSCG00000007435	12.9356	-3.70736	0.332703	-8.88762	6.24313e-19	9.70623e-17	CD2-gd_T_cell vs CD2+gd_T_cell
COTL1	55.251	-1.82955	0.143408	-8.75854	1.97802e-18	2.98737e-16	CD2-gd_T_cell vs CD2+gd_T_cell
IL2RB	23.1841	-2.749	0.248287	-8.65159	5.0788e-18	7.25582e-16	CD2-gd_T_cell vs CD2+gd_T_cell
ENSSSCG00000034914	57.3196	4.18288	0.398351	8.65302	5.01538e-18	7.25582e-16	CD2-gd_T_cell vs CD2+gd_T_cell
ENSSSCG00000014565	445.201	-1.58472	0.11741	-8.61342	7.09158e-18	9.86476e-16	CD2-gd_T_cell vs CD2+gd_T_cell
SELL	93.2938	2.76882	0.262434	8.49804	1.92816e-17	2.6134e-15	CD2-gd_T_cell vs CD2+gd_T_cell
ENSSSCG00000037885	372.674	-1.22393	0.0764277	-8.45741	2.73391e-17	3.61286e-15	CD2-gd_T_cell vs CD2+gd_T_cell
CD6	19.419	-2.69545	0.258517	-8.1897	2.61868e-16	3.37618e-14	CD2-gd_T_cell vs CD2+gd_T_cell
KLRK1	20.7202	-3.2444	0.331395	-8.17626	2.9278e-16	3.68485e-14	CD2-gd_T_cell vs CD2+gd_T_cell
LAPTM5	371.769	1.31554	0.0906896	8.1525	3.56469e-16	4.38208e-14	CD2-gd_T_cell vs CD2+gd_T_cell
PIK3AP1	51.3198	2.20884	0.204194	8.00247	1.21948e-15	1.46504e-13	CD2-gd_T_cell vs CD2+gd_T_cell
ENSSSCG00000005095	19.4428	-2.87422	0.288237	-7.98805	1.37085e-15	1.61029e-13	CD2-gd_T_cell vs CD2+gd_T_cell
PYCARD	28.9394	-2.48826	0.242225	-7.85685	3.93903e-15	4.52646e-13	CD2-gd_T_cell vs CD2+gd_T_cell
ADGRG1	14.5054	-2.95936	0.296599	-7.79377	6.5039e-15	7.31481e-13	CD2-gd_T_cell vs CD2+gd_T_cell
CCR9	9.87457	-3.39157	0.357305	-7.6936	1.43056e-14	1.57541e-12	CD2-gd_T_cell vs CD2+gd_T_cell
ENSSSCG00000000640	7.52615	-4.01596	0.41445	-7.54432	4.54659e-14	4.90475e-12	CD2-gd_T_cell vs CD2+gd_T_cell
STARD4	21.9517	-2.46635	0.250513	-7.4786	7.51174e-14	7.94142e-12	CD2-gd_T_cell vs CD2+gd_T_cell
HPSE	11.4951	-3.12552	0.329401	-7.45822	8.76983e-14	9.08967e-12	CD2-gd_T_cell vs CD2+gd_T_cell
DDAH2	11.6078	-3.06023	0.324992	-7.44181	9.93174e-14	1.0096e-11	CD2-gd_T_cell vs CD2+gd_T_cell
PKIG	6.66333	-4.11255	0.434032	-7.40949	1.26785e-13	1.2645e-11	CD2-gd_T_cell vs CD2+gd_T_cell
ENSSSCG00000037142	816.311	1.54534	0.133208	7.36826	1.72867e-13	1.69218e-11	CD2-gd_T_cell vs CD2+gd_T_cell
ENSSSCG00000037566	17.4046	-2.58051	0.272877	-7.31885	2.501e-13	2.40369e-11	CD2-gd_T_cell vs CD2+gd_T_cell
NAPSA	7.05251	-3.9203	0.418731	-7.31059	2.65976e-13	2.51062e-11	CD2-gd_T_cell vs CD2+gd_T_cell
SLC25A24	33.9424	2.40028	0.249192	7.27522	3.4585e-13	3.2073e-11	CD2-gd_T_cell vs CD2+gd_T_cell
DCK	17.62	-2.65059	0.286413	-7.2698	3.60017e-13	3.28112e-11	CD2-gd_T_cell vs CD2+gd_T_cell
ITGAM	9.86872	-3.22789	0.354297	-7.25419	4.04065e-13	3.62015e-11	CD2-gd_T_cell vs CD2+gd_T_cell
NPB	4.66849	-4.07637	0.47082	-7.24004	4.48557e-13	3.95179e-11	CD2-gd_T_cell vs CD2+gd_T_cell
UBASH3B	22.6399	-2.32546	0.245615	-7.18121	6.9096e-13	5.98757e-11	CD2-gd_T_cell vs CD2+gd_T_cell
RCAN3	53.134	2.04127	0.205019	7.164	7.83563e-13	6.68051e-11	CD2-gd_T_cell vs CD2+gd_T_cell
GATA3	109.917	1.93095	0.190833	7.16125	7.99454e-13	6.7078e-11	CD2-gd_T_cell vs CD2+gd_T_cell
PECAM1	10.1411	-3.5887	0.397078	-7.15319	8.47848e-13	7.00269e-11	CD2-gd_T_cell vs CD2+gd_T_cell
CYBRD1	7.51881	-3.37069	0.373473	-7.14298	9.13307e-13	7.42729e-11	CD2-gd_T_cell vs CD2+gd_T_cell
PDCD1	11.1168	-2.76703	0.304282	-7.09317	1.31079e-12	1.04982e-10	CD2-gd_T_cell vs CD2+gd_T_cell
MAF	13.9941	3.61812	0.393923	7.04914	1.80028e-12	1.42034e-10	CD2-gd_T_cell vs CD2+gd_T_cell
ARPP21	5.17358	-3.91433	0.479088	-7.04539	1.84943e-12	1.43766e-10	CD2-gd_T_cell vs CD2+gd_T_cell
BAG2	4.73431	-4.06025	0.465192	-7.04005	1.92168e-12	1.45114e-10	CD2-gd_T_cell vs CD2+gd_T_cell
TSPO	53.2883	2.01095	0.203459	7.04071	1.91265e-12	1.45114e-10	CD2-gd_T_cell vs CD2+gd_T_cell
FAM49A	7.14326	-3.40852	0.393133	-7.02515	2.1384e-12	1.59206e-10	CD2-gd_T_cell vs CD2+gd_T_cell
MARCKS	6.81625	-3.92366	0.440414	-7.01416	2.31341e-12	1.69843e-10	CD2-gd_T_cell vs CD2+gd_T_cell
TPM1	22.6647	-2.19242	0.234547	-6.99887	2.58036e-12	1.86846e-10	CD2-gd_T_cell vs CD2+gd_T_cell
S100A1	41.458	-1.84543	0.183156	-6.99314	2.68804e-12	1.92013e-10	CD2-gd_T_cell vs CD2+gd_T_cell
FGL2	8.90801	-3.10751	0.355482	-6.91959	4.52952e-12	3.1924e-10	CD2-gd_T_cell vs CD2+gd_T_cell
ENSSSCG00000036013	9.52596	-3.00518	0.346953	-6.90814	4.9106e-12	3.41545e-10	CD2-gd_T_cell vs CD2+gd_T_cell
S100A4	518.712	1.42282	0.124631	6.84692	7.5457e-12	5.18007e-10	CD2-gd_T_cell vs CD2+gd_T_cell
ENSSSCG00000040155	27.9192	-2.28201	0.254846	-6.79972	1.04826e-11	7.01403e-10	CD2-gd_T_cell vs CD2+gd_T_cell
BLK	97.4293	2.77433	0.340947	6.80096	1.03921e-11	7.01403e-10	CD2-gd_T_cell vs CD2+gd_T_cell
TAGAP	42.6241	2.1188	0.228196	6.76542	1.32922e-11	8.78281e-10	CD2-gd_T_cell vs CD2+gd_T_cell
SNTB2	11.6458	-2.82031	0.330269	-6.72007	1.81641e-11	1.18538e-09	CD2-gd_T_cell vs CD2+gd_T_cell
ENSSSCG00000013720	28.3567	2.30849	0.260953	6.59103	4.36772e-11	2.81558e-09	CD2-gd_T_cell vs CD2+gd_T_cell
NEIL2	7.82082	-2.95839	0.36325	-6.4735	9.57568e-11	6.09844e-09	CD2-gd_T_cell vs CD2+gd_T_cell
FUT7	14.0888	2.96086	0.3504	6.40417	1.51186e-10	9.5139e-09	CD2-gd_T_cell vs CD2+gd_T_cell
THEMIS	7.99631	-3.28113	0.434887	-6.39702	1.58443e-10	9.8533e-09	CD2-gd_T_cell vs CD2+gd_T_cell
ENSSSCG00000031278	12.6205	3.27133	0.398782	6.39344	1.622e-10	9.96963e-09	CD2-gd_T_cell vs CD2+gd_T_cell
ENSSSCG00000033090	11.3057	-3.28186	0.417733	-6.38226	1.74491e-10	1.04994e-08	CD2-gd_T_cell vs CD2+gd_T_cell
FES	7.06286	-3.41269	0.404658	-6.382	1.74791e-10	1.04994e-08	CD2-gd_T_cell vs CD2+gd_T_cell
EPHB6	14.2295	-2.59369	0.319103	-6.36025	2.01421e-10	1.1963e-08	CD2-gd_T_cell vs CD2+gd_T_cell
ENSSSCG00000040529	11.8302	3.4797	0.427033	6.2892	3.19115e-10	1.87427e-08	CD2-gd_T_cell vs CD2+gd_T_cell
PLEKHF2	53.9778	1.90202	0.216716	6.23512	4.51442e-10	2.62233e-08	CD2-gd_T_cell vs CD2+gd_T_cell
CXXC5	7.42397	-3.3395	0.433034	-6.20166	5.58692e-10	3.21005e-08	CD2-gd_T_cell vs CD2+gd_T_cell
GNA15	15.4042	-2.21431	0.268811	-6.17039	6.81206e-10	3.87189e-08	CD2-gd_T_cell vs CD2+gd_T_cell
FAM49B	59.7436	-1.40209	0.135171	-6.15717	7.40577e-10	4.16456e-08	CD2-gd_T_cell vs CD2+gd_T_cell
RAB23	3.8557	-3.32352	0.459153	-6.12954	8.81358e-10	4.90406e-08	CD2-gd_T_cell vs CD2+gd_T_cell
ENSSSCG00000037475	10.9805	3.16647	0.396777	6.07645	1.22876e-09	6.76586e-08	CD2-gd_T_cell vs CD2+gd_T_cell
TFDP2	19.9795	-2.0444	0.245681	-6.04434	1.50026e-09	8.17565e-08	CD2-gd_T_cell vs CD2+gd_T_cell
S100A10	173.073	1.40874	0.139545	6.0245	1.69632e-09	9.14973e-08	CD2-gd_T_cell vs CD2+gd_T_cell
PPP1CC	186.203	1.13561	0.0943048	5.93538	2.93158e-09	1.56528e-07	CD2-gd_T_cell vs CD2+gd_T_cell
MATK	20.0261	2.409	0.304149	5.9124	3.37163e-09	1.7646e-07	CD2-gd_T_cell vs CD2+gd_T_cell
IL9R	11.5032	3.20432	0.40312	5.91275	3.36443e-09	1.7646e-07	CD2-gd_T_cell vs CD2+gd_T_cell
IFT80	8.78456	-2.59509	0.343115	-5.89246	3.80486e-09	1.97181e-07	CD2-gd_T_cell vs CD2+gd_T_cell
GPR55	4.84354	-3.08275	0.419215	-5.83578	5.35406e-09	2.74773e-07	CD2-gd_T_cell vs CD2+gd_T_cell
ENSSSCG00000009239	8.70615	-2.55894	0.334493	-5.80904	6.28304e-09	3.19348e-07	CD2-gd_T_cell vs CD2+gd_T_cell
EMP3	206.574	1.19077	0.106153	5.80649	6.37972e-09	3.21174e-07	CD2-gd_T_cell vs CD2+gd_T_cell
VCL	15.659	2.32194	0.302221	5.73821	9.56801e-09	4.77137e-07	CD2-gd_T_cell vs CD2+gd_T_cell
ETS2	9.74022	2.97767	0.398819	5.71258	1.11276e-08	5.45614e-07	CD2-gd_T_cell vs CD2+gd_T_cell
RHOQ	7.24859	-2.80618	0.382253	-5.71227	1.11476e-08	5.45614e-07	CD2-gd_T_cell vs CD2+gd_T_cell
ENSSSCG00000030197	9.06782	-2.93264	0.419975	-5.69502	1.23361e-08	5.98243e-07	CD2-gd_T_cell vs CD2+gd_T_cell
ENSSSCG00000017032	117.493	-1.58836	0.180316	-5.69312	1.24741e-08	5.99437e-07	CD2-gd_T_cell vs CD2+gd_T_cell
HMGN3	148.303	-1.15194	0.102101	-5.65206	1.58534e-08	7.54965e-07	CD2-gd_T_cell vs CD2+gd_T_cell
FLNB	10.2697	-2.37868	0.318355	-5.63342	1.76673e-08	8.33833e-07	CD2-gd_T_cell vs CD2+gd_T_cell
GYPC	54.1266	-1.39747	0.146857	-5.62526	1.85234e-08	8.66501e-07	CD2-gd_T_cell vs CD2+gd_T_cell
SYTL3	16.7732	2.67151	0.365725	5.58364	2.35532e-08	1.09213e-06	CD2-gd_T_cell vs CD2+gd_T_cell
YBX3	73.2798	1.49577	0.169551	5.58169	2.38194e-08	1.09486e-06	CD2-gd_T_cell vs CD2+gd_T_cell
RHBDL2	3.11085	-3.37136	0.501234	-5.56651	2.59899e-08	1.18433e-06	CD2-gd_T_cell vs CD2+gd_T_cell
PHACTR2	12.3676	-2.10705	0.275657	-5.53985	3.02737e-08	1.36775e-06	CD2-gd_T_cell vs CD2+gd_T_cell
FCER1A	48.0831	3.03726	0.431243	5.53729	3.07183e-08	1.37607e-06	CD2-gd_T_cell vs CD2+gd_T_cell
PTPN12	8.61011	-2.3205	0.319208	-5.51938	3.40192e-08	1.51114e-06	CD2-gd_T_cell vs CD2+gd_T_cell
STMN3	62.7554	-2.34831	0.341841	-5.5075	3.63969e-08	1.60328e-06	CD2-gd_T_cell vs CD2+gd_T_cell
FAM89A	14.9348	2.99438	0.418546	5.45923	4.78196e-08	2.08904e-06	CD2-gd_T_cell vs CD2+gd_T_cell
DGKZ	26.3651	-1.60233	0.190633	-5.42032	5.94932e-08	2.57771e-06	CD2-gd_T_cell vs CD2+gd_T_cell
STK17B	33.5476	-1.54709	0.181775	-5.38103	7.40606e-08	3.1828e-06	CD2-gd_T_cell vs CD2+gd_T_cell
CGA	8.17064	3.24426	0.448615	5.37491	7.6619e-08	3.26619e-06	CD2-gd_T_cell vs CD2+gd_T_cell
ENSSSCG00000039658	96.0149	1.58394	0.191408	5.3609	8.28087e-08	3.50181e-06	CD2-gd_T_cell vs CD2+gd_T_cell
B4GALT1	13.9148	-2.01372	0.273206	-5.35515	8.5484e-08	3.58626e-06	CD2-gd_T_cell vs CD2+gd_T_cell
ZAP70	111.949	1.22255	0.12223	5.31588	1.0614e-07	4.41778e-06	CD2-gd_T_cell vs CD2+gd_T_cell
LPAR6	6.58835	-2.6371	0.393669	-5.30724	1.11296e-07	4.59618e-06	CD2-gd_T_cell vs CD2+gd_T_cell
DPP4	8.70942	2.97332	0.416237	5.27545	1.3243e-07	5.42657e-06	CD2-gd_T_cell vs CD2+gd_T_cell
ENSSSCG00000015664	8.22397	-2.42067	0.350057	-5.25657	1.46768e-07	5.96781e-06	CD2-gd_T_cell vs CD2+gd_T_cell
LYN	5.67711	-2.98745	0.446831	-5.23425	1.65652e-07	6.68425e-06	CD2-gd_T_cell vs CD2+gd_T_cell
NEDD9	12.0005	-1.92428	0.265592	-5.23032	1.69213e-07	6.77619e-06	CD2-gd_T_cell vs CD2+gd_T_cell
PTPN1	40.9168	1.5319	0.184061	5.22213	1.76874e-07	7.02974e-06	CD2-gd_T_cell vs CD2+gd_T_cell
TIMP1	34.237	1.76184	0.230571	5.21944	1.79464e-07	7.07945e-06	CD2-gd_T_cell vs CD2+gd_T_cell
TSC22D3	75.9809	1.36387	0.154042	5.19117	2.08973e-07	8.18244e-06	CD2-gd_T_cell vs CD2+gd_T_cell
TNFSF11	8.03537	2.71929	0.404809	5.13297	2.85206e-07	1.10853e-05	CD2-gd_T_cell vs CD2+gd_T_cell
IL6R	34.1096	2.48913	0.431004	5.08014	3.77148e-07	1.45519e-05	CD2-gd_T_cell vs CD2+gd_T_cell
PSIP1	86.5598	-1.14928	0.113778	-5.06939	3.99089e-07	1.52868e-05	CD2-gd_T_cell vs CD2+gd_T_cell
PPP3CA	22.5039	2.05722	0.295316	5.06476	4.08913e-07	1.55505e-05	CD2-gd_T_cell vs CD2+gd_T_cell
GLIPR2	32.0922	1.58961	0.203574	5.04027	4.6487e-07	1.75522e-05	CD2-gd_T_cell vs CD2+gd_T_cell
LAX1	46.3545	1.48703	0.18298	5.0264	4.99773e-07	1.87362e-05	CD2-gd_T_cell vs CD2+gd_T_cell
TGFBR3	3.84252	-2.9376	0.448425	-4.9787	6.40121e-07	2.38287e-05	CD2-gd_T_cell vs CD2+gd_T_cell
C1orf21	12.0345	-2.13886	0.311929	-4.96963	6.70822e-07	2.4797e-05	CD2-gd_T_cell vs CD2+gd_T_cell
TXK	16.5295	1.97526	0.282516	4.96806	6.76251e-07	2.48241e-05	CD2-gd_T_cell vs CD2+gd_T_cell
FADS3	18.3565	-1.65384	0.219909	-4.96444	6.88996e-07	2.51175e-05	CD2-gd_T_cell vs CD2+gd_T_cell
CASS4	11.0448	2.33486	0.351437	4.9481	7.4943e-07	2.71335e-05	CD2-gd_T_cell vs CD2+gd_T_cell
ENSSSCG00000012166	32.0957	-1.41449	0.171978	-4.92055	8.63035e-07	3.1034e-05	CD2-gd_T_cell vs CD2+gd_T_cell
PALM2	4.21196	-2.77128	0.462976	-4.91651	8.80987e-07	3.14655e-05	CD2-gd_T_cell vs CD2+gd_T_cell
BAZ2B	16.0713	-1.79491	0.251673	-4.90701	9.24739e-07	3.28065e-05	CD2-gd_T_cell vs CD2+gd_T_cell
LTB	150.983	1.63315	0.225604	4.8877	1.02022e-06	3.59527e-05	CD2-gd_T_cell vs CD2+gd_T_cell
TMEM87B	11.1344	2.35353	0.362428	4.8743	1.09196e-06	3.82257e-05	CD2-gd_T_cell vs CD2+gd_T_cell
VIM	140.702	1.40041	0.172962	4.85069	1.23034e-06	4.27867e-05	CD2-gd_T_cell vs CD2+gd_T_cell
IKZF3	59.1334	-1.32535	0.156546	-4.84711	1.25273e-06	4.32807e-05	CD2-gd_T_cell vs CD2+gd_T_cell
TBX21	4.86024	-2.4779	0.39883	-4.79977	1.58848e-06	5.45241e-05	CD2-gd_T_cell vs CD2+gd_T_cell
FCER1G	13.1628	-1.94028	0.292045	-4.79616	1.61738e-06	5.51578e-05	CD2-gd_T_cell vs CD2+gd_T_cell
ENSSSCG00000008576	8.7015	2.57722	0.401762	4.78499	1.70995e-06	5.79411e-05	CD2-gd_T_cell vs CD2+gd_T_cell
ITM2B	334.89	1.15489	0.122776	4.77959	1.7565e-06	5.91392e-05	CD2-gd_T_cell vs CD2+gd_T_cell
ENSSSCG00000006376	6.12004	-2.56347	0.523885	-4.7653	1.88574e-06	6.30886e-05	CD2-gd_T_cell vs CD2+gd_T_cell
EMILIN2	6.43541	2.86254	0.446585	4.7555	1.97956e-06	6.5811e-05	CD2-gd_T_cell vs CD2+gd_T_cell
AHR	9.37289	2.54964	0.401795	4.75184	2.01575e-06	6.65953e-05	CD2-gd_T_cell vs CD2+gd_T_cell
DHRS3	22.3006	1.84966	0.27469	4.7179	2.38293e-06	7.82372e-05	CD2-gd_T_cell vs CD2+gd_T_cell
IGFBP2	9.76451	2.39078	0.380541	4.70164	2.58078e-06	8.421e-05	CD2-gd_T_cell vs CD2+gd_T_cell
SERPINB1	19.2795	1.93106	0.290611	4.69942	2.60899e-06	8.46082e-05	CD2-gd_T_cell vs CD2+gd_T_cell
TMEM173	18.0029	1.88562	0.284083	4.65361	3.26181e-06	0.000105134	CD2-gd_T_cell vs CD2+gd_T_cell
TNFSF14	21.9479	1.86419	0.289937	4.64031	3.47891e-06	0.000111452	CD2-gd_T_cell vs CD2+gd_T_cell
SCARB2	10.6663	-1.90824	0.294725	-4.62698	3.71029e-06	0.000118148	CD2-gd_T_cell vs CD2+gd_T_cell
TRIM44	10.978	-1.85272	0.285233	-4.59861	4.25325e-06	0.000134627	CD2-gd_T_cell vs CD2+gd_T_cell
IL18R1	12.6537	2.14505	0.341645	4.58088	4.63016e-06	0.000145685	CD2-gd_T_cell vs CD2+gd_T_cell
TBC1D2B	5.47594	-2.23691	0.367776	-4.54659	5.45228e-06	0.000170537	CD2-gd_T_cell vs CD2+gd_T_cell
UPP1	8.74837	2.59707	0.413003	4.50454	6.65161e-06	0.000206826	CD2-gd_T_cell vs CD2+gd_T_cell
ENSSSCG00000003236	10.8645	-2.29923	0.399092	-4.45508	8.38629e-06	0.000259239	CD2-gd_T_cell vs CD2+gd_T_cell
SOX4	21.7583	-1.56647	0.219303	-4.43436	9.2348e-06	0.000283809	CD2-gd_T_cell vs CD2+gd_T_cell
GSN	36.67	1.58237	0.230859	4.43128	9.36743e-06	0.000286221	CD2-gd_T_cell vs CD2+gd_T_cell
HIF1A	23.7824	1.64672	0.246127	4.40779	1.0443e-05	0.000317252	CD2-gd_T_cell vs CD2+gd_T_cell
SLCO3A1	7.03012	2.5049	0.417471	4.37632	1.20699e-05	0.00036458	CD2-gd_T_cell vs CD2+gd_T_cell
IL21R	6.54784	-2.10452	0.355307	-4.36614	1.26463e-05	0.000379821	CD2-gd_T_cell vs CD2+gd_T_cell
SLC11A2	19.3453	-1.59656	0.230947	-4.35221	1.34772e-05	0.000402488	CD2-gd_T_cell vs CD2+gd_T_cell
MAP4K4	11.8958	2.14193	0.369869	4.3473	1.37822e-05	0.000409285	CD2-gd_T_cell vs CD2+gd_T_cell
TRPC3	3.38477	2.65716	0.489554	4.34248	1.40881e-05	0.000416032	CD2-gd_T_cell vs CD2+gd_T_cell
MISP3	20.27	1.88226	0.316504	4.30759	1.65045e-05	0.000484683	CD2-gd_T_cell vs CD2+gd_T_cell
SGCA	12.2052	-1.97526	0.316344	-4.28717	1.80962e-05	0.00052849	CD2-gd_T_cell vs CD2+gd_T_cell
RHOH	82.3006	-1.17148	0.140434	-4.28437	1.83259e-05	0.000532256	CD2-gd_T_cell vs CD2+gd_T_cell
RRAGD	4.65282	2.42059	0.454555	4.27825	1.88366e-05	0.0005441	CD2-gd_T_cell vs CD2+gd_T_cell
ENSSSCG00000029596	630.07	-0.867856	0.0678287	-4.27609	1.90206e-05	0.000546429	CD2-gd_T_cell vs CD2+gd_T_cell
RIN3	9.60398	-1.80199	0.291089	-4.25648	2.07674e-05	0.000593385	CD2-gd_T_cell vs CD2+gd_T_cell
FGR	4.92143	-2.38922	0.450579	-4.24821	2.15489e-05	0.00060913	CD2-gd_T_cell vs CD2+gd_T_cell
SAMHD1	34.0283	1.49967	0.222006	4.24929	2.14449e-05	0.00060913	CD2-gd_T_cell vs CD2+gd_T_cell
IRF5	9.11849	2.142	0.367816	4.22164	2.42535e-05	0.000681937	CD2-gd_T_cell vs CD2+gd_T_cell
PTPN22	13.4738	-1.61451	0.252911	-4.21154	2.53641e-05	0.000709388	CD2-gd_T_cell vs CD2+gd_T_cell
ENSSSCG00000037187	14.8111	-1.60963	0.258206	-4.20859	2.56974e-05	0.000714928	CD2-gd_T_cell vs CD2+gd_T_cell
SLC1A4	6.00378	2.42647	0.424944	4.19562	2.7213e-05	0.000753131	CD2-gd_T_cell vs CD2+gd_T_cell
JAML	29.6938	-1.56644	0.252497	-4.17188	3.02097e-05	0.000831712	CD2-gd_T_cell vs CD2+gd_T_cell
OCIAD1	57.069	1.21687	0.156349	4.15966	3.18728e-05	0.000872952	CD2-gd_T_cell vs CD2+gd_T_cell
F2R	19.6473	1.8085	0.308343	4.12568	3.69644e-05	0.00100718	CD2-gd_T_cell vs CD2+gd_T_cell
CCR4	5.74065	2.36757	0.43297	4.08812	4.34886e-05	0.00117888	CD2-gd_T_cell vs CD2+gd_T_cell
GNG11	4.9471	-2.22093	0.420312	-4.0788	4.52692e-05	0.00122088	CD2-gd_T_cell vs CD2+gd_T_cell
SNX18	8.50806	-1.98574	0.348283	-4.04169	5.30664e-05	0.0014239	CD2-gd_T_cell vs CD2+gd_T_cell
ENSSSCG00000008898	16.0224	-1.62107	0.265999	-3.99931	6.35265e-05	0.00169597	CD2-gd_T_cell vs CD2+gd_T_cell
CTNNBIP1	8.97096	-1.80834	0.313578	-3.98634	6.71015e-05	0.00178241	CD2-gd_T_cell vs CD2+gd_T_cell
EMB	17.4744	-1.45468	0.228014	-3.97745	6.96581e-05	0.00184106	CD2-gd_T_cell vs CD2+gd_T_cell
MGST1	51.0994	1.3145	0.188823	3.96407	7.36822e-05	0.00193773	CD2-gd_T_cell vs CD2+gd_T_cell
UCP2	92.5073	1.24629	0.174688	3.91762	8.94285e-05	0.00234019	CD2-gd_T_cell vs CD2+gd_T_cell
ENSSSCG00000040294	27.7753	1.46709	0.239277	3.91128	9.18084e-05	0.00239064	CD2-gd_T_cell vs CD2+gd_T_cell
C15orf48	9.94942	2.15801	0.406103	3.89889	9.6636e-05	0.00250401	CD2-gd_T_cell vs CD2+gd_T_cell
GRAP	4.67832	2.33099	0.462399	3.87316	0.000107434	0.00277023	CD2-gd_T_cell vs CD2+gd_T_cell
TMEM9	17.988	-1.42862	0.219453	-3.85834	0.000114159	0.00292934	CD2-gd_T_cell vs CD2+gd_T_cell
GSTA4	17.5514	-1.46475	0.245963	-3.81666	0.000135269	0.00345426	CD2-gd_T_cell vs CD2+gd_T_cell
LY6D	13.7911	-1.96056	0.516263	-3.8127	0.000137456	0.00349323	CD2-gd_T_cell vs CD2+gd_T_cell
MCOLN2	8.19107	1.93172	0.363259	3.79156	0.000149703	0.00375279	CD2-gd_T_cell vs CD2+gd_T_cell
RAB4A	12.617	-1.57994	0.271416	-3.79273	0.000149002	0.00375279	CD2-gd_T_cell vs CD2+gd_T_cell
CALM1	230.674	1.0469	0.125553	3.7914	0.000149799	0.00375279	CD2-gd_T_cell vs CD2+gd_T_cell
RESF1	26.6722	-1.302	0.196435	-3.77922	0.000157318	0.00392256	CD2-gd_T_cell vs CD2+gd_T_cell
RORA	9.62097	1.91641	0.357175	3.74555	0.00018	0.00446704	CD2-gd_T_cell vs CD2+gd_T_cell
C4orf48	7.03322	2.02686	0.397412	3.73997	0.00018404	0.00454578	CD2-gd_T_cell vs CD2+gd_T_cell
ENSSSCG00000039217	9.21884	1.44994	0.521685	3.73881	0.000184893	0.00454578	CD2-gd_T_cell vs CD2+gd_T_cell
PARK7	191.395	1.04337	0.126418	3.71989	0.000199308	0.0048683	CD2-gd_T_cell vs CD2+gd_T_cell
IGFBP4	5.14727	-1.99746	0.422577	-3.7192	0.000199853	0.0048683	CD2-gd_T_cell vs CD2+gd_T_cell
CAT	20.7946	-1.35763	0.211911	-3.71209	0.000205556	0.0049404	CD2-gd_T_cell vs CD2+gd_T_cell
RGS10	19.3088	-1.48992	0.251812	-3.71201	0.000205616	0.0049404	CD2-gd_T_cell vs CD2+gd_T_cell
KDM6B	7.72695	-1.82877	0.351065	-3.71394	0.000204057	0.0049404	CD2-gd_T_cell vs CD2+gd_T_cell
HVCN1	49.2908	1.18265	0.167424	3.70046	0.00021521	0.0051475	CD2-gd_T_cell vs CD2+gd_T_cell
STRBP	17.0907	-1.40181	0.227342	-3.67503	0.000237821	0.00566272	CD2-gd_T_cell vs CD2+gd_T_cell
CBLB	11.1452	-1.60019	0.290816	-3.66589	0.000246483	0.00584264	CD2-gd_T_cell vs CD2+gd_T_cell
PLK3	4.30645	2.30275	0.463562	3.6552	0.000256982	0.00606433	CD2-gd_T_cell vs CD2+gd_T_cell
ENSSSCG00000005481	20.9939	-1.33328	0.215214	-3.61926	0.000295446	0.00694102	CD2-gd_T_cell vs CD2+gd_T_cell
ZC3H12D	7.07681	2.01704	0.403487	3.61207	0.000303763	0.00710483	CD2-gd_T_cell vs CD2+gd_T_cell
ZNF683	64.0874	-1.43114	0.248906	-3.58948	0.000331336	0.00771561	CD2-gd_T_cell vs CD2+gd_T_cell
REV1	22.56	-1.26722	0.199161	-3.56008	0.000370736	0.00859523	CD2-gd_T_cell vs CD2+gd_T_cell
GPR18	6.96881	-1.68369	0.319012	-3.55586	0.000376739	0.00865844	CD2-gd_T_cell vs CD2+gd_T_cell
TRPV5	5.066	-1.96671	0.399362	-3.55597	0.000376589	0.00865844	CD2-gd_T_cell vs CD2+gd_T_cell
ENSSSCG00000004082	7.67939	1.83047	0.375341	3.537	0.000404695	0.00922076	CD2-gd_T_cell vs CD2+gd_T_cell
ABLIM1	88.758	-1.05091	0.135448	-3.53743	0.000404049	0.00922076	CD2-gd_T_cell vs CD2+gd_T_cell
FAM171B	19.7435	-1.41279	0.244269	-3.53177	0.000412781	0.00936465	CD2-gd_T_cell vs CD2+gd_T_cell
CXCR4	62.22	-1.31225	0.233674	-3.52969	0.000416051	0.00939848	CD2-gd_T_cell vs CD2+gd_T_cell
INSIG1	9.99015	-1.69643	0.330128	-3.52067	0.00043046	0.00968261	CD2-gd_T_cell vs CD2+gd_T_cell
ENSSSCG00000011234	69.1184	-1.08818	0.146436	-3.51129	0.000445946	0.00998844	CD2-gd_T_cell vs CD2+gd_T_cell
TLE2	6.51639	-1.97299	0.414255	-3.50874	0.000450232	0.0100419	CD2-gd_T_cell vs CD2+gd_T_cell
SLC9A3R2	6.10597	2.01063	0.418415	3.50318	0.000459746	0.010211	CD2-gd_T_cell vs CD2+gd_T_cell
NCK1	26.3022	-1.21783	0.187379	-3.49885	0.000467269	0.0103347	CD2-gd_T_cell vs CD2+gd_T_cell
PIK3C2B	5.84865	2.01461	0.419889	3.48077	0.000499982	0.0110121	CD2-gd_T_cell vs CD2+gd_T_cell
DPY19L1	5.6475	2.0216	0.422765	3.46345	0.000533293	0.011697	CD2-gd_T_cell vs CD2+gd_T_cell
GCSAML	6.33225	1.99361	0.434249	3.45599	0.000548283	0.0119761	CD2-gd_T_cell vs CD2+gd_T_cell
IPO11	6.858	-1.7135	0.35016	-3.45061	0.000559324	0.012167	CD2-gd_T_cell vs CD2+gd_T_cell
ENSSSCG00000025631	25.5497	-1.23469	0.195318	-3.44119	0.000579162	0.0125469	CD2-gd_T_cell vs CD2+gd_T_cell
ENSSSCG00000005453	102.915	1.12446	0.160996	3.43988	0.000581978	0.0125565	CD2-gd_T_cell vs CD2+gd_T_cell
ZNF462	2.98972	2.08936	0.486333	3.43036	0.000602788	0.0129526	CD2-gd_T_cell vs CD2+gd_T_cell
LNPEP	27.9098	-1.16879	0.178312	-3.42322	0.000618845	0.0132438	CD2-gd_T_cell vs CD2+gd_T_cell
PLCL2	18.3754	-1.29567	0.212841	-3.41363	0.000641044	0.0136635	CD2-gd_T_cell vs CD2+gd_T_cell
CD8A	21.0164	-1.48784	0.28343	-3.40909	0.00065181	0.0138313	CD2-gd_T_cell vs CD2+gd_T_cell
DUSP1	27.013	1.5091	0.29716	3.40811	0.000654149	0.0138313	CD2-gd_T_cell vs CD2+gd_T_cell
ITPRIPL2	10.1162	1.73369	0.378602	3.39707	0.000681108	0.014344	CD2-gd_T_cell vs CD2+gd_T_cell
ENSSSCG00000037364	18.6972	-1.71185	0.337916	-3.38356	0.000715534	0.0150092	CD2-gd_T_cell vs CD2+gd_T_cell
MSI2	7.83945	-1.54465	0.305928	-3.3769	0.000733084	0.0153165	CD2-gd_T_cell vs CD2+gd_T_cell
CD52	1234.03	0.917394	0.102501	3.35765	0.000786088	0.0163593	CD2-gd_T_cell vs CD2+gd_T_cell
ACVR2A	5.26016	1.95316	0.42599	3.35073	0.000805974	0.0167074	CD2-gd_T_cell vs CD2+gd_T_cell
ASPSCR1	11.7073	-1.61524	0.307636	-3.3403	0.000836887	0.0172804	CD2-gd_T_cell vs CD2+gd_T_cell
PFN2	3.39038	2.02743	0.482764	3.32735	0.000876751	0.0180331	CD2-gd_T_cell vs CD2+gd_T_cell
NPL	5.2604	1.90066	0.416021	3.32308	0.000890283	0.0182404	CD2-gd_T_cell vs CD2+gd_T_cell
ENSSSCG00000027790	28.488	-1.25178	0.210346	-3.31678	0.00091062	0.0185851	CD2-gd_T_cell vs CD2+gd_T_cell
LRRC42	8.24483	-1.67282	0.337981	-3.31439	0.000918426	0.0186723	CD2-gd_T_cell vs CD2+gd_T_cell
SLC48A1	5.89109	-1.67193	0.35438	-3.30196	0.00096011	0.0193708	CD2-gd_T_cell vs CD2+gd_T_cell
ALOX5AP	15.5013	1.60307	0.317773	3.30303	0.000956449	0.0193708	CD2-gd_T_cell vs CD2+gd_T_cell
ENSSSCG00000038392	3.62046	2.18346	0.48119	3.2797	0.00103919	0.0208865	CD2-gd_T_cell vs CD2+gd_T_cell
METTL27	7.79482	-1.65898	0.322572	-3.27717	0.00104852	0.0209942	CD2-gd_T_cell vs CD2+gd_T_cell
RPIA	42.6362	1.2506	0.212778	3.27063	0.00107309	0.0214052	CD2-gd_T_cell vs CD2+gd_T_cell
PIK3IP1	30.1908	1.24103	0.210243	3.25665	0.00112735	0.0224029	CD2-gd_T_cell vs CD2+gd_T_cell
PPP2R5C	22.7286	-1.26934	0.217149	-3.241	0.00119111	0.0235814	CD2-gd_T_cell vs CD2+gd_T_cell
GZMM	5.11857	-1.88049	0.426603	-3.21551	0.00130213	0.0256831	CD2-gd_T_cell vs CD2+gd_T_cell
TRAF5	13.264	1.46436	0.283709	3.20624	0.0013448	0.0264261	CD2-gd_T_cell vs CD2+gd_T_cell
DCXR	17.9079	-1.33109	0.247525	-3.20358	0.00135732	0.0265711	CD2-gd_T_cell vs CD2+gd_T_cell
SKAP2	6.10833	-1.69299	0.378361	-3.20254	0.00136223	0.0265711	CD2-gd_T_cell vs CD2+gd_T_cell
RAP1GAP2	10.8574	-1.5277	0.306196	-3.16202	0.0015668	0.0304489	CD2-gd_T_cell vs CD2+gd_T_cell
OTULINL	13.2798	-1.40258	0.282006	-3.14608	0.00165474	0.0320401	CD2-gd_T_cell vs CD2+gd_T_cell
ASPH	3.82294	-1.81293	0.400615	-3.13663	0.00170901	0.0328502	CD2-gd_T_cell vs CD2+gd_T_cell
BEX1	2.61378	-2.02249	0.464653	-3.13754	0.00170371	0.0328502	CD2-gd_T_cell vs CD2+gd_T_cell
ENSSSCG00000039158	2.96278	-1.53226	0.499972	-3.12765	0.00176211	0.0337483	CD2-gd_T_cell vs CD2+gd_T_cell
ENSSSCG00000000500	5.98209	-1.77782	0.410037	-3.11541	0.0018369	0.0350536	CD2-gd_T_cell vs CD2+gd_T_cell
UBAC2	29.7072	-1.11829	0.178091	-3.11047	0.00186789	0.0353895	CD2-gd_T_cell vs CD2+gd_T_cell
CSRP1	29.7899	1.30112	0.240251	3.11108	0.00186405	0.0353895	CD2-gd_T_cell vs CD2+gd_T_cell
MRPS25	43.1082	1.11323	0.176268	3.10778	0.001885	0.0355029	CD2-gd_T_cell vs CD2+gd_T_cell
ELK3	34.4649	-1.07961	0.165446	-3.10742	0.00188731	0.0355029	CD2-gd_T_cell vs CD2+gd_T_cell
ENSSSCG00000031085	2.15971	2.05631	0.50627	3.09733	0.00195274	0.0366035	CD2-gd_T_cell vs CD2+gd_T_cell
ENSSSCG00000001979	26.0667	1.04403	0.460602	3.09208	0.00198756	0.0371246	CD2-gd_T_cell vs CD2+gd_T_cell
CAMK2N1	3.09683	2.02072	0.487714	3.06997	0.0021408	0.0398459	CD2-gd_T_cell vs CD2+gd_T_cell
FDFT1	20.3941	-1.20917	0.212295	-3.05498	0.00225073	0.0417451	CD2-gd_T_cell vs CD2+gd_T_cell
PHF21A	8.09819	1.58183	0.3488	3.05372	0.00226023	0.0417747	CD2-gd_T_cell vs CD2+gd_T_cell
ZNF395	23.4782	-1.25491	0.229393	-3.04816	0.00230248	0.0424074	CD2-gd_T_cell vs CD2+gd_T_cell
DHRS7	2.93966	2.04238	0.482505	3.02303	0.00250257	0.0456471	CD2-gd_T_cell vs CD2+gd_T_cell
PLEKHA2	20.0965	1.29146	0.244037	3.02357	0.00249813	0.0456471	CD2-gd_T_cell vs CD2+gd_T_cell
TRPV2	6.23469	1.73588	0.399677	3.02282	0.00250428	0.0456471	CD2-gd_T_cell vs CD2+gd_T_cell
B2M	2743.03	0.741763	0.0542574	3.01281	0.00258842	0.0468574	CD2-gd_T_cell vs CD2+gd_T_cell
FRMD4B	3.92121	1.89396	0.484348	3.01359	0.00258176	0.0468574	CD2-gd_T_cell vs CD2+gd_T_cell
