# Supplementary material for: Single-Cell RNA-Sequencing Reveals Heterogeneity and Transcriptional Dynamics in Porcine Circulating CD8+ T Cells
Source: Cells. 2024 Apr 16;13(8):692. doi: 10.3390/cells13080692 (PMC11049515; doi:10.3390/cells13080692)
Supplement: Supplementary file 1 [file cells-13-00692-s001.zip › Supplemental Table3.xlsx]

## Sheet: Sheet1
Supplemental Table S3. Gene Ontology enrichment analysis for CD4+ T cell subtypes and γδ T cell subtypes
	ID	Description	GeneRatio	BgRatio	pvalue	p.adjust	qvalue	geneID	Count	group	celltype
GO:0035239	GO:0035239	tube morphogenesis	5/20	225/6333	0.000542064	0.250612	0.221382	ANGPT2/SOX4/ANGPTL1/NKX3-1/ID2	5	up	CD4 T subtypes
GO:0035295	GO:0035295	tube development	5/20	267/6333	0.00118045	0.250612	0.221382	ANGPT2/SOX4/ANGPTL1/NKX3-1/ID2	5	up	CD4 T subtypes
GO:0007049	GO:0007049	cell cycle	5/20	408/6333	0.00748899	0.250612	0.221382	GADD45A/SOX4/SMC4/NKX3-1/ID2	5	up	CD4 T subtypes
GO:0051726	GO:0051726	regulation of cell cycle	4/20	240/6333	0.00603495	0.250612	0.221382	GADD45A/SOX4/NKX3-1/ID2	4	up	CD4 T subtypes
GO:0072359	GO:0072359	circulatory system development	4/20	258/6333	0.00778205	0.250612	0.221382	ANGPT2/SOX4/ANGPTL1/NKX3-1	4	up	CD4 T subtypes
GO:0048646	GO:0048646	anatomical structure formation involved in morphogenesis	4/20	295/6333	0.0123683	0.250612	0.221382	ANGPT2/SOX4/ANGPTL1/NKX3-1	4	up	CD4 T subtypes
GO:0007346	GO:0007346	regulation of mitotic cell cycle	3/20	104/6333	0.00400282	0.250612	0.221382	SOX4/NKX3-1/ID2	3	up	CD4 T subtypes
GO:0007169	GO:0007169	transmembrane receptor protein tyrosine kinase signaling pathway	3/20	167/6333	0.0147623	0.250612	0.221382	ANGPT2/ANGPTL1/NKX3-1	3	up	CD4 T subtypes
GO:0001568	GO:0001568	blood vessel development	3/20	173/6333	0.0162248	0.250612	0.221382	ANGPT2/ANGPTL1/NKX3-1	3	up	CD4 T subtypes
GO:0001944	GO:0001944	vasculature development	3/20	182/6333	0.0185684	0.250612	0.221382	ANGPT2/ANGPTL1/NKX3-1	3	up	CD4 T subtypes
GO:0009628	GO:0009628	response to abiotic stimulus	3/20	204/6333	0.0250632	0.250612	0.221382	DDIT4/NKX3-1/ID2	3	up	CD4 T subtypes
GO:0051093	GO:0051093	negative regulation of developmental process	3/20	213/6333	0.0280356	0.250612	0.221382	ANGPT2/MBNL3/NKX3-1	3	up	CD4 T subtypes
GO:0000278	GO:0000278	mitotic cell cycle	3/20	214/6333	0.0283772	0.250612	0.221382	SOX4/NKX3-1/ID2	3	up	CD4 T subtypes
GO:0008284	GO:0008284	positive regulation of cell population proliferation	3/20	234/6333	0.0356837	0.250612	0.221382	SOX4/NKX3-1/ID2	3	up	CD4 T subtypes
GO:0006974	GO:0006974	cellular response to DNA damage stimulus	3/20	247/6333	0.0409152	0.250612	0.221382	SOX4/DDIT4/NKX3-1	3	up	CD4 T subtypes
GO:0007167	GO:0007167	enzyme linked receptor protein signaling pathway	3/20	252/6333	0.0430277	0.250612	0.221382	ANGPT2/ANGPTL1/NKX3-1	3	up	CD4 T subtypes
GO:0009790	GO:0009790	embryo development	3/20	257/6333	0.0451954	0.250612	0.221382	SOX4/NKX3-1/ID2	3	up	CD4 T subtypes
GO:0009887	GO:0009887	animal organ morphogenesis	3/20	259/6333	0.0460779	0.250612	0.221382	SOX4/NKX3-1/ID2	3	up	CD4 T subtypes
GO:0060429	GO:0060429	epithelium development	3/20	265/6333	0.048778	0.250612	0.221382	SOX4/NKX3-1/ID2	3	up	CD4 T subtypes
GO:2000045	GO:2000045	regulation of G1/S transition of mitotic cell cycle	2/20	20/6333	0.00174009	0.250612	0.221382	SOX4/ID2	2	up	CD4 T subtypes
GO:1902806	GO:1902806	regulation of cell cycle G1/S phase transition	2/20	26/6333	0.00294286	0.250612	0.221382	SOX4/ID2	2	up	CD4 T subtypes
GO:0072331	GO:0072331	signal transduction by p53 class mediator	2/20	32/6333	0.00444058	0.250612	0.221382	SOX4/DDIT4	2	up	CD4 T subtypes
GO:1901654	GO:1901654	response to ketone	2/20	32/6333	0.00444058	0.250612	0.221382	DDIT4/NKX3-1	2	up	CD4 T subtypes
GO:0000082	GO:0000082	G1/S transition of mitotic cell cycle	2/20	34/6333	0.00500356	0.250612	0.221382	SOX4/ID2	2	up	CD4 T subtypes
GO:0046887	GO:0046887	positive regulation of hormone secretion	2/20	34/6333	0.00500356	0.250612	0.221382	SOX4/NKX3-1	2	up	CD4 T subtypes
GO:0044843	GO:0044843	cell cycle G1/S phase transition	2/20	39/6333	0.00654684	0.250612	0.221382	SOX4/ID2	2	up	CD4 T subtypes
GO:0071383	GO:0071383	cellular response to steroid hormone stimulus	2/20	42/6333	0.00756408	0.250612	0.221382	DDIT4/NKX3-1	2	up	CD4 T subtypes
GO:0001666	GO:0001666	response to hypoxia	2/20	43/6333	0.0079181	0.250612	0.221382	DDIT4/NKX3-1	2	up	CD4 T subtypes
GO:0036293	GO:0036293	response to decreased oxygen levels	2/20	44/6333	0.00827951	0.250612	0.221382	DDIT4/NKX3-1	2	up	CD4 T subtypes
GO:0070482	GO:0070482	response to oxygen levels	2/20	48/6333	0.00979815	0.250612	0.221382	DDIT4/NKX3-1	2	up	CD4 T subtypes
GO:0048545	GO:0048545	response to steroid hormone	2/20	53/6333	0.0118574	0.250612	0.221382	DDIT4/NKX3-1	2	up	CD4 T subtypes
GO:0097193	GO:0097193	intrinsic apoptotic signaling pathway	2/20	60/6333	0.0150309	0.250612	0.221382	DDIT4/NKX3-1	2	up	CD4 T subtypes
GO:1901990	GO:1901990	regulation of mitotic cell cycle phase transition	2/20	61/6333	0.0155111	0.250612	0.221382	SOX4/ID2	2	up	CD4 T subtypes
GO:0046883	GO:0046883	regulation of hormone secretion	2/20	68/6333	0.0190556	0.250612	0.221382	SOX4/NKX3-1	2	up	CD4 T subtypes
GO:1903532	GO:1903532	positive regulation of secretion by cell	2/20	68/6333	0.0190556	0.250612	0.221382	SOX4/NKX3-1	2	up	CD4 T subtypes
GO:0051047	GO:0051047	positive regulation of secretion	2/20	73/6333	0.0217776	0.250612	0.221382	SOX4/NKX3-1	2	up	CD4 T subtypes
GO:0046879	GO:0046879	hormone secretion	2/20	79/6333	0.0252452	0.250612	0.221382	SOX4/NKX3-1	2	up	CD4 T subtypes
GO:0009914	GO:0009914	hormone transport	2/20	82/6333	0.0270588	0.250612	0.221382	SOX4/NKX3-1	2	up	CD4 T subtypes
GO:1901987	GO:1901987	regulation of cell cycle phase transition	2/20	85/6333	0.0289242	0.250612	0.221382	SOX4/ID2	2	up	CD4 T subtypes
GO:0044772	GO:0044772	mitotic cell cycle phase transition	2/20	87/6333	0.0301961	0.250612	0.221382	SOX4/ID2	2	up	CD4 T subtypes
GO:0060562	GO:0060562	epithelial tube morphogenesis	2/20	96/6333	0.0361907	0.250612	0.221382	SOX4/NKX3-1	2	up	CD4 T subtypes
GO:0071407	GO:0071407	cellular response to organic cyclic compound	2/20	103/6333	0.0411475	0.250612	0.221382	DDIT4/NKX3-1	2	up	CD4 T subtypes
GO:0048732	GO:0048732	gland development	2/20	105/6333	0.0426091	0.250612	0.221382	NKX3-1/ID2	2	up	CD4 T subtypes
GO:0051090	GO:0051090	regulation of DNA-binding transcription factor activity	2/20	109/6333	0.045591	0.250612	0.221382	NKX3-1/ID2	2	up	CD4 T subtypes
GO:0044770	GO:0044770	cell cycle phase transition	2/20	110/6333	0.0463484	0.250612	0.221382	SOX4/ID2	2	up	CD4 T subtypes
GO:0043065	GO:0043065	positive regulation of apoptotic process	2/20	114/6333	0.0494254	0.250612	0.221382	SOX4/NKX3-1	2	up	CD4 T subtypes
GO:0007622	GO:0007622	rhythmic behavior	1/20	10/6333	0.0311574	0.250612	0.221382	ID2	1	up	CD4 T subtypes
GO:0010596	GO:0010596	negative regulation of endothelial cell migration	1/20	10/6333	0.0311574	0.250612	0.221382	ANGPT2	1	up	CD4 T subtypes
GO:0030521	GO:0030521	androgen receptor signaling pathway	1/20	10/6333	0.0311574	0.250612	0.221382	NKX3-1	1	up	CD4 T subtypes
GO:0033598	GO:0033598	mammary gland epithelial cell proliferation	1/20	10/6333	0.0311574	0.250612	0.221382	ID2	1	up	CD4 T subtypes
GO:0035272	GO:0035272	exocrine system development	1/20	10/6333	0.0311574	0.250612	0.221382	NKX3-1	1	up	CD4 T subtypes
GO:0045777	GO:0045777	positive regulation of blood pressure	1/20	10/6333	0.0311574	0.250612	0.221382	ID2	1	up	CD4 T subtypes
GO:0048661	GO:0048661	positive regulation of smooth muscle cell proliferation	1/20	10/6333	0.0311574	0.250612	0.221382	ID2	1	up	CD4 T subtypes
GO:0000466	GO:0000466	maturation of 5.8S rRNA from tricistronic rRNA transcript (SSU-rRNA, 5.8S rRNA, LSU-rRNA)	1/20	11/6333	0.0342219	0.250612	0.221382	NOL9	1	up	CD4 T subtypes
GO:0009649	GO:0009649	entrainment of circadian clock	1/20	11/6333	0.0342219	0.250612	0.221382	ID2	1	up	CD4 T subtypes
GO:0021522	GO:0021522	spinal cord motor neuron differentiation	1/20	11/6333	0.0342219	0.250612	0.221382	SOX4	1	up	CD4 T subtypes
GO:0035929	GO:0035929	steroid hormone secretion	1/20	11/6333	0.0342219	0.250612	0.221382	NKX3-1	1	up	CD4 T subtypes
GO:0042771	GO:0042771	intrinsic apoptotic signaling pathway in response to DNA damage by p53 class mediator	1/20	11/6333	0.0342219	0.250612	0.221382	DDIT4	1	up	CD4 T subtypes
GO:0043567	GO:0043567	regulation of insulin-like growth factor receptor signaling pathway	1/20	11/6333	0.0342219	0.250612	0.221382	NKX3-1	1	up	CD4 T subtypes
GO:0045662	GO:0045662	negative regulation of myoblast differentiation	1/20	11/6333	0.0342219	0.250612	0.221382	MBNL3	1	up	CD4 T subtypes
GO:0050918	GO:0050918	positive chemotaxis	1/20	11/6333	0.0342219	0.250612	0.221382	ANGPT2	1	up	CD4 T subtypes
GO:1903317	GO:1903317	regulation of protein maturation	1/20	11/6333	0.0342219	0.250612	0.221382	SOX4	1	up	CD4 T subtypes
GO:2000134	GO:2000134	negative regulation of G1/S transition of mitotic cell cycle	1/20	11/6333	0.0342219	0.250612	0.221382	SOX4	1	up	CD4 T subtypes
GO:0006110	GO:0006110	regulation of glycolytic process	1/20	12/6333	0.0372772	0.250612	0.221382	DDIT4	1	up	CD4 T subtypes
GO:0006805	GO:0006805	xenobiotic metabolic process	1/20	12/6333	0.0372772	0.250612	0.221382	GSTA4	1	up	CD4 T subtypes
GO:0010677	GO:0010677	negative regulation of cellular carbohydrate metabolic process	1/20	12/6333	0.0372772	0.250612	0.221382	DDIT4	1	up	CD4 T subtypes
GO:0032007	GO:0032007	negative regulation of TOR signaling	1/20	12/6333	0.0372772	0.250612	0.221382	DDIT4	1	up	CD4 T subtypes
GO:0035904	GO:0035904	aorta development	1/20	12/6333	0.0372772	0.250612	0.221382	NKX3-1	1	up	CD4 T subtypes
GO:0044773	GO:0044773	mitotic DNA damage checkpoint signaling	1/20	12/6333	0.0372772	0.250612	0.221382	SOX4	1	up	CD4 T subtypes
GO:0071385	GO:0071385	cellular response to glucocorticoid stimulus	1/20	12/6333	0.0372772	0.250612	0.221382	DDIT4	1	up	CD4 T subtypes
GO:1901985	GO:1901985	positive regulation of protein acetylation	1/20	12/6333	0.0372772	0.250612	0.221382	SOX4	1	up	CD4 T subtypes
GO:0000469	GO:0000469	cleavage involved in rRNA processing	1/20	13/6333	0.0403233	0.250612	0.221382	NOL9	1	up	CD4 T subtypes
GO:0043470	GO:0043470	regulation of carbohydrate catabolic process	1/20	13/6333	0.0403233	0.250612	0.221382	DDIT4	1	up	CD4 T subtypes
GO:0044774	GO:0044774	mitotic DNA integrity checkpoint signaling	1/20	13/6333	0.0403233	0.250612	0.221382	SOX4	1	up	CD4 T subtypes
GO:0045912	GO:0045912	negative regulation of carbohydrate metabolic process	1/20	13/6333	0.0403233	0.250612	0.221382	DDIT4	1	up	CD4 T subtypes
GO:0048009	GO:0048009	insulin-like growth factor receptor signaling pathway	1/20	13/6333	0.0403233	0.250612	0.221382	NKX3-1	1	up	CD4 T subtypes
GO:0048546	GO:0048546	digestive tract morphogenesis	1/20	13/6333	0.0403233	0.250612	0.221382	ID2	1	up	CD4 T subtypes
GO:0060512	GO:0060512	prostate gland morphogenesis	1/20	13/6333	0.0403233	0.250612	0.221382	NKX3-1	1	up	CD4 T subtypes
GO:0060740	GO:0060740	prostate gland epithelium morphogenesis	1/20	13/6333	0.0403233	0.250612	0.221382	NKX3-1	1	up	CD4 T subtypes
GO:0071384	GO:0071384	cellular response to corticosteroid stimulus	1/20	13/6333	0.0403233	0.250612	0.221382	DDIT4	1	up	CD4 T subtypes
GO:0071466	GO:0071466	cellular response to xenobiotic stimulus	1/20	13/6333	0.0403233	0.250612	0.221382	GSTA4	1	up	CD4 T subtypes
GO:1902807	GO:1902807	negative regulation of cell cycle G1/S phase transition	1/20	13/6333	0.0403233	0.250612	0.221382	SOX4	1	up	CD4 T subtypes
GO:0021517	GO:0021517	ventral spinal cord development	1/20	14/6333	0.0433603	0.250612	0.221382	SOX4	1	up	CD4 T subtypes
GO:0044060	GO:0044060	regulation of endocrine process	1/20	14/6333	0.0433603	0.250612	0.221382	NKX3-1	1	up	CD4 T subtypes
GO:0048483	GO:0048483	autonomic nervous system development	1/20	14/6333	0.0433603	0.250612	0.221382	SOX4	1	up	CD4 T subtypes
GO:0050922	GO:0050922	negative regulation of chemotaxis	1/20	14/6333	0.0433603	0.250612	0.221382	ANGPT2	1	up	CD4 T subtypes
GO:0000460	GO:0000460	maturation of 5.8S rRNA	1/20	15/6333	0.0463881	0.250612	0.221382	NOL9	1	up	CD4 T subtypes
GO:0009410	GO:0009410	response to xenobiotic stimulus	1/20	15/6333	0.0463881	0.250612	0.221382	GSTA4	1	up	CD4 T subtypes
GO:0010633	GO:0010633	negative regulation of epithelial cell migration	1/20	15/6333	0.0463881	0.250612	0.221382	ANGPT2	1	up	CD4 T subtypes
GO:0051384	GO:0051384	response to glucocorticoid	1/20	15/6333	0.0463881	0.250612	0.221382	DDIT4	1	up	CD4 T subtypes
GO:0060986	GO:0060986	endocrine hormone secretion	1/20	15/6333	0.0463881	0.250612	0.221382	NKX3-1	1	up	CD4 T subtypes
GO:0010812	GO:0010812	negative regulation of cell-substrate adhesion	1/20	16/6333	0.0494068	0.250612	0.221382	ANGPT2	1	up	CD4 T subtypes
GO:0030330	GO:0030330	DNA damage response, signal transduction by p53 class mediator	1/20	16/6333	0.0494068	0.250612	0.221382	SOX4	1	up	CD4 T subtypes
GO:0030850	GO:0030850	prostate gland development	1/20	16/6333	0.0494068	0.250612	0.221382	NKX3-1	1	up	CD4 T subtypes
GO:0032024	GO:0032024	positive regulation of insulin secretion	1/20	16/6333	0.0494068	0.250612	0.221382	SOX4	1	up	CD4 T subtypes
GO:0072332	GO:0072332	intrinsic apoptotic signaling pathway by p53 class mediator	1/20	16/6333	0.0494068	0.250612	0.221382	DDIT4	1	up	CD4 T subtypes
GO:00071551	GO:0007155	cell adhesion	16/71	332/6333	5.19943e-07	5.79972e-05	4.82129e-05	ITGB1/S100A10/CXCR3/CD9/CD40LG/CD80/ANXA1/ADAM19/CD86/CCR2/NRP1/DPP4/ITGA4/ICOS/VCL/FOXP3	16	down	CD4 T subtypes
GO:00226101	GO:0022610	biological adhesion	16/71	336/6333	6.11318e-07	6.25072e-05	5.1962e-05	ITGB1/S100A10/CXCR3/CD9/CD40LG/CD80/ANXA1/ADAM19/CD86/CCR2/NRP1/DPP4/ITGA4/ICOS/VCL/FOXP3	16	down	CD4 T subtypes
GO:00026821	GO:0002682	regulation of immune system process	15/71	350/6333	5.44595e-06	0.000202491	0.00016833	CXCR3/AQP3/CD40LG/SAMHD1/CD80/LY96/ANXA1/CD86/CCR2/CTLA4/DPP4/ICOS/GPR183/TBK1/FOXP3	15	down	CD4 T subtypes
GO:00069521	GO:0006952	defense response	15/71	477/6333	0.000203119	0.00566425	0.00470867	CCR4/CD74/CXCR3/CD40LG/SAMHD1/BST2/LY96/ANXA1/ISG20/CCR2/IRF5/HMGB2/TNFRSF1B/TBK1/IL2RA	15	down	CD4 T subtypes
GO:00301551	GO:0030155	regulation of cell adhesion	14/71	170/6333	3.75802e-09	4.61109e-06	3.83318e-06	S100A10/CXCR3/CD9/CD40LG/CD80/ANXA1/ADAM19/CD86/CCR2/NRP1/DPP4/ICOS/VCL/FOXP3	14	down	CD4 T subtypes
GO:00017751	GO:0001775	cell activation	14/71	269/6333	1.21094e-06	8.85638e-05	7.36227e-05	CD9/CD40LG/CD80/ANXA1/CD86/CCR2/CTLA4/DPP4/ICOS/GPR183/ITM2A/TBK1/IL6R/FOXP3	14	down	CD4 T subtypes
GO:00444191	GO:0044419	biological process involved in interspecies interaction between organisms	14/71	412/6333	0.000152972	0.00436504	0.00362864	S100A6/ANXA2/SAMHD1/BST2/CD80/LY96/ANXA1/CD86/ISG20/IRF5/VIM/HMGB2/NRP1/TBK1	14	down	CD4 T subtypes
GO:00466491	GO:0046649	lymphocyte activation	13/71	203/6333	2.90227e-07	5.08726e-05	4.22902e-05	CD40LG/CD80/ANXA1/CD86/CCR2/CTLA4/DPP4/ICOS/GPR183/ITM2A/TBK1/IL6R/FOXP3	13	down	CD4 T subtypes
GO:00453211	GO:0045321	leukocyte activation	13/71	238/6333	1.79287e-06	0.000100731	8.37373e-05	CD40LG/CD80/ANXA1/CD86/CCR2/CTLA4/DPP4/ICOS/GPR183/ITM2A/TBK1/IL6R/FOXP3	13	down	CD4 T subtypes
GO:00517071	GO:0051707	response to other organism	12/71	387/6333	0.00109199	0.0209354	0.0174036	S100A6/SAMHD1/BST2/CD80/LY96/ANXA1/CD86/ISG20/IRF5/VIM/HMGB2/TBK1	12	down	CD4 T subtypes
GO:00432071	GO:0043207	response to external biotic stimulus	12/71	388/6333	0.00111684	0.0210825	0.0175258	S100A6/SAMHD1/BST2/CD80/LY96/ANXA1/CD86/ISG20/IRF5/VIM/HMGB2/TBK1	12	down	CD4 T subtypes
GO:00096071	GO:0009607	response to biotic stimulus	12/71	400/6333	0.00145385	0.0244367	0.0203141	S100A6/SAMHD1/BST2/CD80/LY96/ANXA1/CD86/ISG20/IRF5/VIM/HMGB2/TBK1	12	down	CD4 T subtypes
GO:00421271	GO:0042127	regulation of cell population proliferation	12/71	412/6333	0.00187152	0.0287044	0.0238618	S100A11/CD40LG/CD80/ANXA1/CD86/CCR2/CTLA4/HMGB2/DPP4/GPR183/IL6R/FOXP3	12	down	CD4 T subtypes
GO:0050865	GO:0050865	regulation of cell activation	11/71	136/6333	2.54829e-07	5.08726e-05	4.22902e-05	CD9/CD40LG/CD80/ANXA1/CD86/CCR2/CTLA4/DPP4/ICOS/GPR183/FOXP3	11	down	CD4 T subtypes
GO:00421101	GO:0042110	T cell activation	11/71	153/6333	8.39954e-07	7.4056e-05	6.15624e-05	CD40LG/CD80/ANXA1/CD86/CCR2/CTLA4/DPP4/ICOS/GPR183/IL6R/FOXP3	11	down	CD4 T subtypes
GO:00986091	GO:0098609	cell-cell adhesion	11/71	184/6333	5.17642e-06	0.000198483	0.000164998	CD9/CD40LG/CD80/ANXA1/ADAM19/CD86/CCR2/DPP4/ICOS/VCL/FOXP3	11	down	CD4 T subtypes
GO:00400111	GO:0040011	locomotion	11/71	460/6333	0.0126573	0.100197	0.0832932	ITGB1/CCR4/CXCR3/ANXA1/TMSB10/CCR2/HMGB2/NRP1/DPP4/GPR183/VCL	11	down	CD4 T subtypes
GO:0022407	GO:0022407	regulation of cell-cell adhesion	10/71	99/6333	1.15396e-07	5.08726e-05	4.22902e-05	CD9/CD40LG/CD80/ANXA1/ADAM19/CD86/CCR2/DPP4/ICOS/FOXP3	10	down	CD4 T subtypes
GO:0045785	GO:0045785	positive regulation of cell adhesion	10/71	107/6333	2.42449e-07	5.08726e-05	4.22902e-05	S100A10/CD40LG/CD80/ANXA1/ADAM19/CD86/CCR2/NRP1/DPP4/ICOS	10	down	CD4 T subtypes
GO:0051249	GO:0051249	regulation of lymphocyte activation	10/71	107/6333	2.42449e-07	5.08726e-05	4.22902e-05	CD40LG/CD80/ANXA1/CD86/CCR2/CTLA4/DPP4/ICOS/GPR183/FOXP3	10	down	CD4 T subtypes
GO:0002694	GO:0002694	regulation of leukocyte activation	10/71	128/6333	1.29922e-06	8.85638e-05	7.36227e-05	CD40LG/CD80/ANXA1/CD86/CCR2/CTLA4/DPP4/ICOS/GPR183/FOXP3	10	down	CD4 T subtypes
GO:00321011	GO:0032101	regulation of response to external stimulus	10/71	209/6333	9.81317e-05	0.00293677	0.00244132	CD74/CD9/MT3/SAMHD1/LY96/ANXA1/CCR2/NRP1/GPR183/TBK1	10	down	CD4 T subtypes
GO:0002684	GO:0002684	positive regulation of immune system process	10/71	214/6333	0.000119504	0.00349123	0.00290225	AQP3/CD40LG/CD80/ANXA1/CD86/CCR2/DPP4/ICOS/GPR183/TBK1	10	down	CD4 T subtypes
GO:00164771	GO:0016477	cell migration	10/71	365/6333	0.00706218	0.0728176	0.060533	ITGB1/CCR4/CXCR3/ANXA1/TMSB10/CCR2/NRP1/DPP4/GPR183/VCL	10	down	CD4 T subtypes
GO:00488701	GO:0048870	cell motility	10/71	412/6333	0.0157948	0.118897	0.0988387	ITGB1/CCR4/CXCR3/ANXA1/TMSB10/CCR2/NRP1/DPP4/GPR183/VCL	10	down	CD4 T subtypes
GO:00516741	GO:0051674	localization of cell	10/71	412/6333	0.0157948	0.118897	0.0988387	ITGB1/CCR4/CXCR3/ANXA1/TMSB10/CCR2/NRP1/DPP4/GPR183/VCL	10	down	CD4 T subtypes
GO:00485841	GO:0048584	positive regulation of response to stimulus	10/71	493/6333	0.0469084	0.226601	0.188372	CD74/MT3/LY96/ANXA1/S100A4/CCR2/NRP1/GPR183/TBK1/IL6R	10	down	CD4 T subtypes
GO:0050863	GO:0050863	regulation of T cell activation	9/71	83/6333	2.82614e-07	5.08726e-05	4.22902e-05	CD40LG/CD80/ANXA1/CD86/CCR2/CTLA4/DPP4/ICOS/FOXP3	9	down	CD4 T subtypes
GO:0032943	GO:0032943	mononuclear cell proliferation	9/71	103/6333	1.8061e-06	0.000100731	8.37373e-05	CD40LG/CD80/ANXA1/CD86/CCR2/CTLA4/GPR183/TBK1/FOXP3	9	down	CD4 T subtypes
GO:0046651	GO:0046651	lymphocyte proliferation	9/71	103/6333	1.8061e-06	0.000100731	8.37373e-05	CD40LG/CD80/ANXA1/CD86/CCR2/CTLA4/GPR183/TBK1/FOXP3	9	down	CD4 T subtypes
GO:0070661	GO:0070661	leukocyte proliferation	9/71	107/6333	2.48999e-06	0.000127301	0.000105824	CD40LG/CD80/ANXA1/CD86/CCR2/CTLA4/GPR183/TBK1/FOXP3	9	down	CD4 T subtypes
GO:00069541	GO:0006954	inflammatory response	9/71	215/6333	0.000605203	0.0142805	0.0118713	CCR4/CD74/CXCR3/CD40LG/ANXA1/CCR2/HMGB2/TNFRSF1B/IL2RA	9	down	CD4 T subtypes
GO:00512701	GO:0051270	regulation of cellular component movement	9/71	223/6333	0.000787694	0.0167778	0.0139473	ITGB1/CXCR3/CD9/ANXA1/TMSB10/CCR2/NRP1/GPR183/VCL	9	down	CD4 T subtypes
GO:00106281	GO:0010628	positive regulation of gene expression	9/71	304/6333	0.00649287	0.0675148	0.0561248	CD74/MT3/CD40LG/LY96/ANXA1/ADAM19/CCR2/HMGB2/TBK1	9	down	CD4 T subtypes
GO:00106471	GO:0010647	positive regulation of cell communication	9/71	375/6333	0.023314	0.151776	0.126171	CD74/MT3/LY96/S100A4/CCR2/NRP1/GPR183/TBK1/IL6R	9	down	CD4 T subtypes
GO:00230561	GO:0023056	positive regulation of signaling	9/71	379/6333	0.024777	0.15752	0.130946	CD74/MT3/LY96/S100A4/CCR2/NRP1/GPR183/TBK1/IL6R	9	down	CD4 T subtypes
GO:0032944	GO:0032944	regulation of mononuclear cell proliferation	8/71	63/6333	3.95302e-07	5.38928e-05	4.48009e-05	CD40LG/CD80/ANXA1/CD86/CCR2/CTLA4/GPR183/FOXP3	8	down	CD4 T subtypes
GO:0050670	GO:0050670	regulation of lymphocyte proliferation	8/71	63/6333	3.95302e-07	5.38928e-05	4.48009e-05	CD40LG/CD80/ANXA1/CD86/CCR2/CTLA4/GPR183/FOXP3	8	down	CD4 T subtypes
GO:0070663	GO:0070663	regulation of leukocyte proliferation	8/71	65/6333	5.06086e-07	5.79972e-05	4.82129e-05	CD40LG/CD80/ANXA1/CD86/CCR2/CTLA4/GPR183/FOXP3	8	down	CD4 T subtypes
GO:0022409	GO:0022409	positive regulation of cell-cell adhesion	8/71	70/6333	9.0533e-07	7.4056e-05	6.15624e-05	CD40LG/CD80/ANXA1/ADAM19/CD86/CCR2/DPP4/ICOS	8	down	CD4 T subtypes
GO:0051251	GO:0051251	positive regulation of lymphocyte activation	8/71	70/6333	9.0533e-07	7.4056e-05	6.15624e-05	CD40LG/CD80/ANXA1/CD86/CCR2/DPP4/ICOS/GPR183	8	down	CD4 T subtypes
GO:1903037	GO:1903037	regulation of leukocyte cell-cell adhesion	8/71	76/6333	1.71418e-06	0.000100731	8.37373e-05	CD40LG/CD80/ANXA1/CD86/CCR2/DPP4/ICOS/FOXP3	8	down	CD4 T subtypes
GO:0002696	GO:0002696	positive regulation of leukocyte activation	8/71	82/6333	3.07153e-06	0.000144952	0.000120498	CD40LG/CD80/ANXA1/CD86/CCR2/DPP4/ICOS/GPR183	8	down	CD4 T subtypes
GO:0050867	GO:0050867	positive regulation of cell activation	8/71	83/6333	3.36901e-06	0.000153103	0.000127274	CD40LG/CD80/ANXA1/CD86/CCR2/DPP4/ICOS/GPR183	8	down	CD4 T subtypes
GO:0007159	GO:0007159	leukocyte cell-cell adhesion	8/71	89/6333	5.71842e-06	0.000206368	0.000171553	CD40LG/CD80/ANXA1/CD86/CCR2/DPP4/ICOS/FOXP3	8	down	CD4 T subtypes
GO:00303341	GO:0030334	regulation of cell migration	8/71	194/6333	0.00136581	0.0232756	0.0193489	ITGB1/CXCR3/ANXA1/TMSB10/CCR2/NRP1/GPR183/VCL	8	down	CD4 T subtypes
GO:0001816	GO:0001816	cytokine production	8/71	200/6333	0.00165934	0.0271469	0.0225671	CD74/CD40LG/LY96/ANXA1/CCR2/TBK1/IL6R/FOXP3	8	down	CD4 T subtypes
GO:20001451	GO:2000145	regulation of cell motility	8/71	210/6333	0.00225811	0.0327734	0.0272444	ITGB1/CXCR3/ANXA1/TMSB10/CCR2/NRP1/GPR183/VCL	8	down	CD4 T subtypes
GO:00400121	GO:0040012	regulation of locomotion	8/71	221/6333	0.00310133	0.0413623	0.0343843	ITGB1/CXCR3/ANXA1/TMSB10/CCR2/NRP1/GPR183/VCL	8	down	CD4 T subtypes
GO:00082841	GO:0008284	positive regulation of cell population proliferation	8/71	234/6333	0.00439557	0.0544784	0.0452876	CD40LG/CD80/ANXA1/CD86/CCR2/DPP4/GPR183/IL6R	8	down	CD4 T subtypes
GO:00985421	GO:0098542	defense response to other organism	8/71	318/6333	0.0250405	0.158375	0.131656	SAMHD1/BST2/LY96/ANXA1/ISG20/IRF5/HMGB2/TBK1	8	down	CD4 T subtypes
GO:19017001	GO:1901700	response to oxygen-containing compound	8/71	332/6333	0.0313405	0.179698	0.149382	GPX1/AQP3/MT3/CD80/LY96/CD86/VIM/HMGB2	8	down	CD4 T subtypes
GO:00099671	GO:0009967	positive regulation of signal transduction	8/71	335/6333	0.0328214	0.184733	0.153568	CD74/MT3/LY96/S100A4/NRP1/GPR183/TBK1/IL6R	8	down	CD4 T subtypes
GO:0042129	GO:0042129	regulation of T cell proliferation	7/71	51/6333	1.28868e-06	8.85638e-05	7.36227e-05	CD40LG/CD80/ANXA1/CD86/CCR2/CTLA4/FOXP3	7	down	CD4 T subtypes
GO:0050870	GO:0050870	positive regulation of T cell activation	7/71	56/6333	2.46923e-06	0.000127301	0.000105824	CD40LG/CD80/ANXA1/CD86/CCR2/DPP4/ICOS	7	down	CD4 T subtypes
GO:0042098	GO:0042098	T cell proliferation	7/71	60/6333	3.96833e-06	0.000167901	0.000139576	CD40LG/CD80/ANXA1/CD86/CCR2/CTLA4/FOXP3	7	down	CD4 T subtypes
GO:1903039	GO:1903039	positive regulation of leukocyte cell-cell adhesion	7/71	60/6333	3.96833e-06	0.000167901	0.000139576	CD40LG/CD80/ANXA1/CD86/CCR2/DPP4/ICOS	7	down	CD4 T subtypes
GO:00069351	GO:0006935	chemotaxis	7/71	163/6333	0.00219279	0.0327734	0.0272444	CCR4/CXCR3/ANXA1/CCR2/HMGB2/NRP1/GPR183	7	down	CD4 T subtypes
GO:00423301	GO:0042330	taxis	7/71	164/6333	0.00227037	0.0327734	0.0272444	CCR4/CXCR3/ANXA1/CCR2/HMGB2/NRP1/GPR183	7	down	CD4 T subtypes
GO:00339931	GO:0033993	response to lipid	7/71	166/6333	0.00243189	0.0346968	0.0288433	AQP3/CD80/LY96/ANXA1/CD86/VIM/HMGB2	7	down	CD4 T subtypes
GO:0001817	GO:0001817	regulation of cytokine production	7/71	195/6333	0.005921	0.06696	0.0556636	CD74/CD40LG/LY96/ANXA1/CCR2/TBK1/FOXP3	7	down	CD4 T subtypes
GO:00512411	GO:0051241	negative regulation of multicellular organismal process	7/71	228/6333	0.013431	0.10564	0.0878183	CD9/MT3/ANXA1/CCR2/NRP1/ANXA5/FOXP3	7	down	CD4 T subtypes
GO:00801341	GO:0080134	regulation of response to stress	7/71	286/6333	0.0401743	0.203694	0.16933	CD74/CD9/SAMHD1/ANXA1/CCR2/FAS/TBK1	7	down	CD4 T subtypes
GO:0050866	GO:0050866	negative regulation of cell activation	6/71	40/6333	4.55367e-06	0.000180237	0.000149831	CD9/CD80/ANXA1/CD86/CCR2/FOXP3	6	down	CD4 T subtypes
GO:0032946	GO:0032946	positive regulation of mononuclear cell proliferation	6/71	42/6333	6.11443e-06	0.0002084	0.000173242	CD40LG/CD80/ANXA1/CD86/CCR2/GPR183	6	down	CD4 T subtypes
GO:0050671	GO:0050671	positive regulation of lymphocyte proliferation	6/71	42/6333	6.11443e-06	0.0002084	0.000173242	CD40LG/CD80/ANXA1/CD86/CCR2/GPR183	6	down	CD4 T subtypes
GO:0070665	GO:0070665	positive regulation of leukocyte proliferation	6/71	43/6333	7.04351e-06	0.000233578	0.000194173	CD40LG/CD80/ANXA1/CD86/CCR2/GPR183	6	down	CD4 T subtypes
GO:00603261	GO:0060326	cell chemotaxis	6/71	97/6333	0.000709456	0.0158273	0.0131572	CCR4/CXCR3/ANXA1/CCR2/NRP1/GPR183	6	down	CD4 T subtypes
GO:0002250	GO:0002250	adaptive immune response	6/71	132/6333	0.00345731	0.045129	0.0375155	SLA-DQB1/ANXA1/CCR2/GPR183/IL6R/FOXP3	6	down	CD4 T subtypes
GO:0001819	GO:0001819	positive regulation of cytokine production	6/71	133/6333	0.00358907	0.045774	0.0380517	CD74/CD40LG/LY96/ANXA1/CCR2/TBK1	6	down	CD4 T subtypes
GO:0009617	GO:0009617	response to bacterium	6/71	164/6333	0.00983314	0.0880676	0.0732102	CD80/LY96/CD86/VIM/HMGB2/TBK1	6	down	CD4 T subtypes
GO:0002252	GO:0002252	immune effector process	6/71	173/6333	0.0125869	0.100197	0.0832932	ANXA1/CCR2/GPR183/ITM2A/IL6R/FOXP3	6	down	CD4 T subtypes
GO:0030036	GO:0030036	actin cytoskeleton organization	6/71	204/6333	0.0261891	0.164182	0.136484	S100A10/RDX/ANXA1/TMSB10/NRP1/TPM4	6	down	CD4 T subtypes
GO:0097435	GO:0097435	supramolecular fiber organization	6/71	211/6333	0.0302507	0.175083	0.145546	S100A10/RDX/TMSB10/VIM/NRP1/TPM4	6	down	CD4 T subtypes
GO:0045087	GO:0045087	innate immune response	6/71	220/6333	0.036057	0.191249	0.158984	SAMHD1/LY96/ANXA1/ISG20/HMGB2/TBK1	6	down	CD4 T subtypes
GO:0050776	GO:0050776	regulation of immune response	6/71	221/6333	0.0367437	0.191849	0.159483	SAMHD1/LY96/ANXA1/CCR2/TBK1/FOXP3	6	down	CD4 T subtypes
GO:19025331	GO:1902533	positive regulation of intracellular signal transduction	6/71	221/6333	0.0367437	0.191849	0.159483	CD74/MT3/S100A4/NRP1/GPR183/TBK1	6	down	CD4 T subtypes
GO:0030029	GO:0030029	actin filament-based process	6/71	222/6333	0.0374388	0.19465	0.161812	S100A10/RDX/ANXA1/TMSB10/NRP1/TPM4	6	down	CD4 T subtypes
GO:0042102	GO:0042102	positive regulation of T cell proliferation	5/71	34/6333	3.31982e-05	0.00107195	0.000891109	CD40LG/CD80/ANXA1/CD86/CCR2	5	down	CD4 T subtypes
GO:0002695	GO:0002695	negative regulation of leukocyte activation	5/71	39/6333	6.57698e-05	0.00201749	0.00167713	CD80/ANXA1/CD86/CCR2/FOXP3	5	down	CD4 T subtypes
GO:0022408	GO:0022408	negative regulation of cell-cell adhesion	5/71	39/6333	6.57698e-05	0.00201749	0.00167713	CD9/CD80/ANXA1/CD86/FOXP3	5	down	CD4 T subtypes
GO:00071621	GO:0007162	negative regulation of cell adhesion	5/71	58/6333	0.000443832	0.0110406	0.00917804	CD9/CD80/ANXA1/CD86/FOXP3	5	down	CD4 T subtypes
GO:0032496	GO:0032496	response to lipopolysaccharide	5/71	69/6333	0.000989648	0.0192746	0.0160229	CD80/LY96/CD86/VIM/HMGB2	5	down	CD4 T subtypes
GO:0002237	GO:0002237	response to molecule of bacterial origin	5/71	76/6333	0.00153129	0.0253904	0.0211069	CD80/LY96/CD86/VIM/HMGB2	5	down	CD4 T subtypes
GO:0002683	GO:0002683	negative regulation of immune system process	5/71	83/6333	0.00226528	0.0327734	0.0272444	CD80/ANXA1/CD86/CCR2/FOXP3	5	down	CD4 T subtypes
GO:0002366	GO:0002366	leukocyte activation involved in immune response	5/71	92/6333	0.00355014	0.045774	0.0380517	ANXA1/CCR2/GPR183/ITM2A/IL6R	5	down	CD4 T subtypes
GO:0002263	GO:0002263	cell activation involved in immune response	5/71	93/6333	0.00371964	0.0465714	0.0387146	ANXA1/CCR2/GPR183/ITM2A/IL6R	5	down	CD4 T subtypes
GO:0009611	GO:0009611	response to wounding	5/71	103/6333	0.00574837	0.0659182	0.0547975	F2R/CD9/CD40LG/ANXA1/CCR2	5	down	CD4 T subtypes
GO:0032103	GO:0032103	positive regulation of response to external stimulus	5/71	103/6333	0.00574837	0.0659182	0.0547975	CD74/LY96/CCR2/NRP1/TBK1	5	down	CD4 T subtypes
GO:00096151	GO:0009615	response to virus	5/71	115/6333	0.00909024	0.0826202	0.0686818	S100A6/SAMHD1/BST2/ISG20/IRF5	5	down	CD4 T subtypes
GO:00713961	GO:0071396	cellular response to lipid	5/71	117/6333	0.00975487	0.088009	0.0731616	CD80/LY96/ANXA1/CD86/VIM	5	down	CD4 T subtypes
GO:00300981	GO:0030098	lymphocyte differentiation	5/71	121/6333	0.0111834	0.0952919	0.0792157	ANXA1/CCR2/GPR183/ITM2A/IL6R	5	down	CD4 T subtypes
GO:0060284	GO:0060284	regulation of cell development	5/71	124/6333	0.0123445	0.0989984	0.082297	S100A10/MT3/HMGB2/NRP1/VCL	5	down	CD4 T subtypes
GO:0007015	GO:0007015	actin filament organization	5/71	129/6333	0.0144578	0.112102	0.0931898	S100A10/RDX/TMSB10/NRP1/TPM4	5	down	CD4 T subtypes
GO:0031347	GO:0031347	regulation of defense response	5/71	134/6333	0.0168027	0.120461	0.100139	CD74/SAMHD1/ANXA1/CCR2/TBK1	5	down	CD4 T subtypes
GO:19031311	GO:1903131	mononuclear cell differentiation	5/71	134/6333	0.0168027	0.120461	0.100139	ANXA1/CCR2/GPR183/ITM2A/IL6R	5	down	CD4 T subtypes
GO:0051129	GO:0051129	negative regulation of cellular component organization	5/71	162/6333	0.034629	0.18718	0.155602	MT3/RDX/TMSB10/NRP1/DPP4	5	down	CD4 T subtypes
GO:00025211	GO:0002521	leukocyte differentiation	5/71	166/6333	0.0378705	0.196064	0.162987	ANXA1/CCR2/GPR183/ITM2A/IL6R	5	down	CD4 T subtypes
GO:0031295	GO:0031295	T cell costimulation	4/71	10/6333	2.89573e-06	0.000142122	0.000118146	CD80/CD86/DPP4/ICOS	4	down	CD4 T subtypes
GO:0031294	GO:0031294	lymphocyte costimulation	4/71	11/6333	4.51194e-06	0.000180237	0.000149831	CD80/CD86/DPP4/ICOS	4	down	CD4 T subtypes
GO:0050868	GO:0050868	negative regulation of T cell activation	4/71	28/6333	0.000242382	0.00660894	0.00549399	CD80/ANXA1/CD86/FOXP3	4	down	CD4 T subtypes
GO:1903038	GO:1903038	negative regulation of leukocyte cell-cell adhesion	4/71	29/6333	0.000278795	0.00743655	0.00618198	CD80/ANXA1/CD86/FOXP3	4	down	CD4 T subtypes
GO:0051250	GO:0051250	negative regulation of lymphocyte activation	4/71	34/6333	0.00052185	0.0125551	0.010437	CD80/ANXA1/CD86/FOXP3	4	down	CD4 T subtypes
GO:0046631	GO:0046631	alpha-beta T cell activation	4/71	36/6333	0.000651735	0.0150883	0.0125428	ANXA1/CCR2/GPR183/IL6R	4	down	CD4 T subtypes
GO:0007160	GO:0007160	cell-matrix adhesion	4/71	42/6333	0.0011773	0.0215604	0.0179231	ITGB1/S100A10/NRP1/VCL	4	down	CD4 T subtypes
GO:0071222	GO:0071222	cellular response to lipopolysaccharide	4/71	47/6333	0.00179871	0.0279369	0.0232238	CD80/LY96/CD86/VIM	4	down	CD4 T subtypes
GO:0071219	GO:0071219	cellular response to molecule of bacterial origin	4/71	52/6333	0.00261767	0.0360886	0.0300003	CD80/LY96/CD86/VIM	4	down	CD4 T subtypes
GO:0019058	GO:0019058	viral life cycle	4/71	56/6333	0.00343401	0.045129	0.0375155	ANXA2/SAMHD1/ISG20/NRP1	4	down	CD4 T subtypes
GO:0050817	GO:0050817	coagulation	4/71	61/6333	0.00467867	0.0568388	0.0472499	F2R/CD9/CD40LG/ANXA5	4	down	CD4 T subtypes
GO:0071216	GO:0071216	cellular response to biotic stimulus	4/71	61/6333	0.00467867	0.0568388	0.0472499	CD80/LY96/CD86/VIM	4	down	CD4 T subtypes
GO:00302171	GO:0030217	T cell differentiation	4/71	69/6333	0.00724834	0.0741143	0.0616109	ANXA1/CCR2/GPR183/IL6R	4	down	CD4 T subtypes
GO:0002285	GO:0002285	lymphocyte activation involved in immune response	4/71	73/6333	0.0088257	0.0817228	0.0679358	ANXA1/GPR183/ITM2A/IL6R	4	down	CD4 T subtypes
GO:0002460	GO:0002460	adaptive immune response based on somatic recombination of immune receptors built from immunoglobulin superfamily domains	4/71	76/6333	0.0101458	0.0889204	0.0739191	ANXA1/CCR2/IL6R/FOXP3	4	down	CD4 T subtypes
GO:00315891	GO:0031589	cell-substrate adhesion	4/71	76/6333	0.0101458	0.0889204	0.0739191	ITGB1/S100A10/NRP1/VCL	4	down	CD4 T subtypes
GO:0048872	GO:0048872	homeostasis of number of cells	4/71	77/6333	0.0106127	0.0910782	0.0757129	CCR4/CCR2/FAS/GPR183	4	down	CD4 T subtypes
GO:0016032	GO:0016032	viral process	4/71	79/6333	0.011588	0.0973869	0.0809573	ANXA2/SAMHD1/ISG20/NRP1	4	down	CD4 T subtypes
GO:0110053	GO:0110053	regulation of actin filament organization	4/71	79/6333	0.011588	0.0973869	0.0809573	S100A10/RDX/TMSB10/NRP1	4	down	CD4 T subtypes
GO:00509001	GO:0050900	leukocyte migration	4/71	88/6333	0.0166856	0.120461	0.100139	CXCR3/ANXA1/CCR2/GPR183	4	down	CD4 T subtypes
GO:0050878	GO:0050878	regulation of body fluid levels	4/71	89/6333	0.0173261	0.122885	0.102154	F2R/CD9/AQP3/CD40LG	4	down	CD4 T subtypes
GO:0042060	GO:0042060	wound healing	4/71	90/6333	0.0179819	0.125964	0.104713	F2R/CD9/CD40LG/ANXA1	4	down	CD4 T subtypes
GO:0032956	GO:0032956	regulation of actin cytoskeleton organization	4/71	97/6333	0.0230065	0.150957	0.12549	S100A10/RDX/TMSB10/NRP1	4	down	CD4 T subtypes
GO:0034329	GO:0034329	cell junction assembly	4/71	101/6333	0.0262263	0.164182	0.136484	S100A10/CD9/NRP1/VCL	4	down	CD4 T subtypes
GO:0032970	GO:0032970	regulation of actin filament-based process	4/71	103/6333	0.0279331	0.169659	0.141037	S100A10/RDX/TMSB10/NRP1	4	down	CD4 T subtypes
GO:00516071	GO:0051607	defense response to virus	4/71	105/6333	0.0297052	0.172741	0.143599	SAMHD1/BST2/ISG20/IRF5	4	down	CD4 T subtypes
GO:01405461	GO:0140546	defense response to symbiont	4/71	105/6333	0.0297052	0.172741	0.143599	SAMHD1/BST2/ISG20/IRF5	4	down	CD4 T subtypes
GO:0032535	GO:0032535	regulation of cellular component size	4/71	108/6333	0.0324863	0.18369	0.152701	MT3/RDX/TMSB10/NRP1	4	down	CD4 T subtypes
GO:1902903	GO:1902903	regulation of supramolecular fiber organization	4/71	109/6333	0.0334464	0.185519	0.154221	S100A10/RDX/TMSB10/NRP1	4	down	CD4 T subtypes
GO:0042130	GO:0042130	negative regulation of T cell proliferation	3/71	14/6333	0.000449904	0.0110406	0.00917804	CD80/CD86/FOXP3	3	down	CD4 T subtypes
GO:0051893	GO:0051893	regulation of focal adhesion assembly	3/71	14/6333	0.000449904	0.0110406	0.00917804	S100A10/NRP1/VCL	3	down	CD4 T subtypes
GO:0090109	GO:0090109	regulation of cell-substrate junction assembly	3/71	14/6333	0.000449904	0.0110406	0.00917804	S100A10/NRP1/VCL	3	down	CD4 T subtypes
GO:0150116	GO:0150116	regulation of cell-substrate junction organization	3/71	16/6333	0.000681106	0.0154762	0.0128653	S100A10/NRP1/VCL	3	down	CD4 T subtypes
GO:0032945	GO:0032945	negative regulation of mononuclear cell proliferation	3/71	17/6333	0.00082043	0.0167778	0.0139473	CD80/CD86/FOXP3	3	down	CD4 T subtypes
GO:0048041	GO:0048041	focal adhesion assembly	3/71	17/6333	0.00082043	0.0167778	0.0139473	S100A10/NRP1/VCL	3	down	CD4 T subtypes
GO:0050672	GO:0050672	negative regulation of lymphocyte proliferation	3/71	17/6333	0.00082043	0.0167778	0.0139473	CD80/CD86/FOXP3	3	down	CD4 T subtypes
GO:0070664	GO:0070664	negative regulation of leukocyte proliferation	3/71	17/6333	0.00082043	0.0167778	0.0139473	CD80/CD86/FOXP3	3	down	CD4 T subtypes
GO:0032623	GO:0032623	interleukin-2 production	3/71	18/6333	0.000976631	0.0192746	0.0160229	ANXA1/CCR2/FOXP3	3	down	CD4 T subtypes
GO:0032663	GO:0032663	regulation of interleukin-2 production	3/71	18/6333	0.000976631	0.0192746	0.0160229	ANXA1/CCR2/FOXP3	3	down	CD4 T subtypes
GO:0042093	GO:0042093	T-helper cell differentiation	3/71	19/6333	0.00115046	0.0213882	0.0177799	ANXA1/GPR183/IL6R	3	down	CD4 T subtypes
GO:0002287	GO:0002287	alpha-beta T cell activation involved in immune response	3/71	20/6333	0.00134266	0.0232034	0.0192889	ANXA1/GPR183/IL6R	3	down	CD4 T subtypes
GO:0002293	GO:0002293	alpha-beta T cell differentiation involved in immune response	3/71	20/6333	0.00134266	0.0232034	0.0192889	ANXA1/GPR183/IL6R	3	down	CD4 T subtypes
GO:0002294	GO:0002294	CD4-positive, alpha-beta T cell differentiation involved in immune response	3/71	20/6333	0.00134266	0.0232034	0.0192889	ANXA1/GPR183/IL6R	3	down	CD4 T subtypes
GO:0007044	GO:0007044	cell-substrate junction assembly	3/71	20/6333	0.00134266	0.0232034	0.0192889	S100A10/NRP1/VCL	3	down	CD4 T subtypes
GO:0002292	GO:0002292	T cell differentiation involved in immune response	3/71	22/6333	0.00178487	0.0279369	0.0232238	ANXA1/GPR183/IL6R	3	down	CD4 T subtypes
GO:0002698	GO:0002698	negative regulation of immune effector process	3/71	22/6333	0.00178487	0.0279369	0.0232238	ANXA1/CCR2/FOXP3	3	down	CD4 T subtypes
GO:0150115	GO:0150115	cell-substrate junction organization	3/71	22/6333	0.00178487	0.0279369	0.0232238	S100A10/NRP1/VCL	3	down	CD4 T subtypes
GO:0043367	GO:0043367	CD4-positive, alpha-beta T cell differentiation	3/71	23/6333	0.0020362	0.0308447	0.025641	ANXA1/GPR183/IL6R	3	down	CD4 T subtypes
GO:0001776	GO:0001776	leukocyte homeostasis	3/71	25/6333	0.00260235	0.0360886	0.0300003	CCR2/FAS/GPR183	3	down	CD4 T subtypes
GO:0048675	GO:0048675	axon extension	3/71	25/6333	0.00260235	0.0360886	0.0300003	MT3/NRP1/VCL	3	down	CD4 T subtypes
GO:0001952	GO:0001952	regulation of cell-matrix adhesion	3/71	26/6333	0.00291831	0.039349	0.0327107	S100A10/NRP1/VCL	3	down	CD4 T subtypes
GO:0035710	GO:0035710	CD4-positive, alpha-beta T cell activation	3/71	26/6333	0.00291831	0.039349	0.0327107	ANXA1/GPR183/IL6R	3	down	CD4 T subtypes
GO:0046632	GO:0046632	alpha-beta T cell differentiation	3/71	28/6333	0.00361865	0.045774	0.0380517	ANXA1/GPR183/IL6R	3	down	CD4 T subtypes
GO:1990138	GO:1990138	neuron projection extension	3/71	32/6333	0.00530631	0.062008	0.051547	MT3/NRP1/VCL	3	down	CD4 T subtypes
GO:0007229	GO:0007229	integrin-mediated signaling pathway	3/71	37/6333	0.00798736	0.0771692	0.0641505	ITGB1/NRP1/ITGA4	3	down	CD4 T subtypes
GO:0050777	GO:0050777	negative regulation of immune response	3/71	37/6333	0.00798736	0.0771692	0.0641505	ANXA1/CCR2/FOXP3	3	down	CD4 T subtypes
GO:1903900	GO:1903900	regulation of viral life cycle	3/71	38/6333	0.00860316	0.0817228	0.0679358	ANXA2/SAMHD1/ISG20	3	down	CD4 T subtypes
GO:0071674	GO:0071674	mononuclear cell migration	3/71	40/6333	0.00991657	0.0881713	0.0732964	ANXA1/CCR2/GPR183	3	down	CD4 T subtypes
GO:0002822	GO:0002822	regulation of adaptive immune response based on somatic recombination of immune receptors built from immunoglobulin superfamily domains	3/71	41/6333	0.0106147	0.0910782	0.0757129	ANXA1/CCR2/FOXP3	3	down	CD4 T subtypes
GO:0002685	GO:0002685	regulation of leukocyte migration	3/71	43/6333	0.0120946	0.0976322	0.0811612	CXCR3/ANXA1/CCR2	3	down	CD4 T subtypes
GO:0048588	GO:0048588	developmental cell growth	3/71	43/6333	0.0120946	0.0976322	0.0811612	MT3/NRP1/VCL	3	down	CD4 T subtypes
GO:0050792	GO:0050792	regulation of viral process	3/71	43/6333	0.0120946	0.0976322	0.0811612	ANXA2/SAMHD1/ISG20	3	down	CD4 T subtypes
GO:0050731	GO:0050731	positive regulation of peptidyl-tyrosine phosphorylation	3/71	45/6333	0.0136875	0.106972	0.0889251	CD80/NRP1/IL6R	3	down	CD4 T subtypes
GO:0002819	GO:0002819	regulation of adaptive immune response	3/71	46/6333	0.0145266	0.112102	0.0931898	ANXA1/CCR2/FOXP3	3	down	CD4 T subtypes
GO:00108101	GO:0010810	regulation of cell-substrate adhesion	3/71	50/6333	0.0181709	0.125964	0.104713	S100A10/NRP1/VCL	3	down	CD4 T subtypes
GO:0044403	GO:0044403	biological process involved in symbiotic interaction	3/71	50/6333	0.0181709	0.125964	0.104713	ANXA2/SAMHD1/NRP1	3	down	CD4 T subtypes
GO:00509201	GO:0050920	regulation of chemotaxis	3/71	50/6333	0.0181709	0.125964	0.104713	CCR2/NRP1/GPR183	3	down	CD4 T subtypes
GO:1901888	GO:1901888	regulation of cell junction assembly	3/71	51/6333	0.0191542	0.128428	0.106761	S100A10/NRP1/VCL	3	down	CD4 T subtypes
GO:0002286	GO:0002286	T cell activation involved in immune response	3/71	52/6333	0.0201667	0.134481	0.111794	ANXA1/GPR183/IL6R	3	down	CD4 T subtypes
GO:00197221	GO:0019722	calcium-mediated signaling	3/71	54/6333	0.0222789	0.146969	0.122175	CCR4/CXCR3/CCR2	3	down	CD4 T subtypes
GO:0060560	GO:0060560	developmental growth involved in morphogenesis	3/71	55/6333	0.0233787	0.151776	0.126171	MT3/NRP1/VCL	3	down	CD4 T subtypes
GO:0051402	GO:0051402	neuron apoptotic process	3/71	56/6333	0.0245076	0.157439	0.130878	MT3/NRP1/FAS	3	down	CD4 T subtypes
GO:0097191	GO:0097191	extrinsic apoptotic signaling pathway	3/71	56/6333	0.0245076	0.157439	0.130878	HMGB2/NRP1/FAS	3	down	CD4 T subtypes
GO:0070374	GO:0070374	positive regulation of ERK1 and ERK2 cascade	3/71	58/6333	0.0268529	0.165262	0.137382	MT3/NRP1/GPR183	3	down	CD4 T subtypes
GO:0007596	GO:0007596	blood coagulation	3/71	59/6333	0.0280692	0.169659	0.141037	F2R/CD9/CD40LG	3	down	CD4 T subtypes
GO:0007599	GO:0007599	hemostasis	3/71	59/6333	0.0280692	0.169659	0.141037	F2R/CD9/CD40LG	3	down	CD4 T subtypes
GO:0072659	GO:0072659	protein localization to plasma membrane	3/71	60/6333	0.0293144	0.1721	0.143066	ITGB1/S100A10/GOLPH3L	3	down	CD4 T subtypes
GO:0031349	GO:0031349	positive regulation of defense response	3/71	62/6333	0.0318919	0.181164	0.150601	CD74/CCR2/TBK1	3	down	CD4 T subtypes
GO:0030595	GO:0030595	leukocyte chemotaxis	3/71	64/6333	0.0345847	0.18718	0.155602	ANXA1/CCR2/GPR183	3	down	CD4 T subtypes
GO:0050730	GO:0050730	regulation of peptidyl-tyrosine phosphorylation	3/71	64/6333	0.0345847	0.18718	0.155602	CD80/NRP1/IL6R	3	down	CD4 T subtypes
GO:1990778	GO:1990778	protein localization to cell periphery	3/71	67/6333	0.0388385	0.197738	0.164379	ITGB1/S100A10/GOLPH3L	3	down	CD4 T subtypes
GO:0022604	GO:0022604	regulation of cell morphogenesis	3/71	70/6333	0.0433472	0.214464	0.178283	S100A10/ANXA1/NRP1	3	down	CD4 T subtypes
GO:0070997	GO:0070997	neuron death	3/71	72/6333	0.0464928	0.226601	0.188372	MT3/NRP1/FAS	3	down	CD4 T subtypes
GO:00420631	GO:0042063	gliogenesis	3/71	73/6333	0.0481071	0.23148	0.192429	MT3/CCR2/GPR183	3	down	CD4 T subtypes
GO:0002831	GO:0002831	regulation of response to biotic stimulus	3/71	74/6333	0.0497489	0.236596	0.196682	SAMHD1/LY96/TBK1	3	down	CD4 T subtypes
GO:0018108	GO:0018108	peptidyl-tyrosine phosphorylation	3/71	74/6333	0.0497489	0.236596	0.196682	CD80/NRP1/IL6R	3	down	CD4 T subtypes
GO:0044788	GO:0044788	modulation by host of viral process	2/71	10/6333	0.00526203	0.062008	0.051547	ANXA2/SAMHD1	2	down	CD4 T subtypes
GO:0050819	GO:0050819	negative regulation of coagulation	2/71	10/6333	0.00526203	0.062008	0.051547	CD9/ANXA5	2	down	CD4 T subtypes
GO:0051496	GO:0051496	positive regulation of stress fiber assembly	2/71	10/6333	0.00526203	0.062008	0.051547	S100A10/NRP1	2	down	CD4 T subtypes
GO:0001954	GO:0001954	positive regulation of cell-matrix adhesion	2/71	11/6333	0.00638494	0.06696	0.0556636	S100A10/NRP1	2	down	CD4 T subtypes
GO:0010559	GO:0010559	regulation of glycoprotein biosynthetic process	2/71	11/6333	0.00638494	0.06696	0.0556636	MT3/ITM2A	2	down	CD4 T subtypes
GO:0032233	GO:0032233	positive regulation of actin filament bundle assembly	2/71	11/6333	0.00638494	0.06696	0.0556636	S100A10/NRP1	2	down	CD4 T subtypes
GO:0032633	GO:0032633	interleukin-4 production	2/71	11/6333	0.00638494	0.06696	0.0556636	CD40LG/FOXP3	2	down	CD4 T subtypes
GO:0032673	GO:0032673	regulation of interleukin-4 production	2/71	11/6333	0.00638494	0.06696	0.0556636	CD40LG/FOXP3	2	down	CD4 T subtypes
GO:0032743	GO:0032743	positive regulation of interleukin-2 production	2/71	11/6333	0.00638494	0.06696	0.0556636	ANXA1/CCR2	2	down	CD4 T subtypes
GO:0042088	GO:0042088	T-helper 1 type immune response	2/71	11/6333	0.00638494	0.06696	0.0556636	ANXA1/CCR2	2	down	CD4 T subtypes
GO:0045920	GO:0045920	negative regulation of exocytosis	2/71	11/6333	0.00638494	0.06696	0.0556636	ANXA1/CCR2	2	down	CD4 T subtypes
GO:0048010	GO:0048010	vascular endothelial growth factor receptor signaling pathway	2/71	11/6333	0.00638494	0.06696	0.0556636	MT3/NRP1	2	down	CD4 T subtypes
GO:0002369	GO:0002369	T cell cytokine production	2/71	12/6333	0.00760666	0.074667	0.0620704	CCR2/FOXP3	2	down	CD4 T subtypes
GO:0002724	GO:0002724	regulation of T cell cytokine production	2/71	12/6333	0.00760666	0.074667	0.0620704	CCR2/FOXP3	2	down	CD4 T subtypes
GO:0050771	GO:0050771	negative regulation of axonogenesis	2/71	12/6333	0.00760666	0.074667	0.0620704	MT3/NRP1	2	down	CD4 T subtypes
GO:0070265	GO:0070265	necrotic cell death	2/71	12/6333	0.00760666	0.074667	0.0620704	MT3/FAS	2	down	CD4 T subtypes
GO:1900026	GO:1900026	positive regulation of substrate adhesion-dependent cell spreading	2/71	12/6333	0.00760666	0.074667	0.0620704	S100A10/NRP1	2	down	CD4 T subtypes
GO:0008347	GO:0008347	glial cell migration	2/71	13/6333	0.0089249	0.0817228	0.0679358	CCR2/GPR183	2	down	CD4 T subtypes
GO:0010573	GO:0010573	vascular endothelial growth factor production	2/71	13/6333	0.0089249	0.0817228	0.0679358	CCR2/IL6R	2	down	CD4 T subtypes
GO:0032613	GO:0032613	interleukin-10 production	2/71	13/6333	0.0089249	0.0817228	0.0679358	CD40LG/FOXP3	2	down	CD4 T subtypes
GO:0032653	GO:0032653	regulation of interleukin-10 production	2/71	13/6333	0.0089249	0.0817228	0.0679358	CD40LG/FOXP3	2	down	CD4 T subtypes
GO:1903018	GO:1903018	regulation of glycoprotein metabolic process	2/71	13/6333	0.0089249	0.0817228	0.0679358	MT3/ITM2A	2	down	CD4 T subtypes
GO:0002548	GO:0002548	monocyte chemotaxis	2/71	14/6333	0.0103374	0.0899574	0.0747812	ANXA1/CCR2	2	down	CD4 T subtypes
GO:0010770	GO:0010770	positive regulation of cell morphogenesis involved in differentiation	2/71	15/6333	0.0118419	0.0975172	0.0810657	S100A10/NRP1	2	down	CD4 T subtypes
GO:0051492	GO:0051492	regulation of stress fiber assembly	2/71	15/6333	0.0118419	0.0975172	0.0810657	S100A10/NRP1	2	down	CD4 T subtypes
GO:1900024	GO:1900024	regulation of substrate adhesion-dependent cell spreading	2/71	15/6333	0.0118419	0.0975172	0.0810657	S100A10/NRP1	2	down	CD4 T subtypes
GO:0006900	GO:0006900	vesicle budding from membrane	2/71	17/6333	0.0151185	0.11522	0.0957816	S100A10/GOLPH3L	2	down	CD4 T subtypes
GO:0032231	GO:0032231	regulation of actin filament bundle assembly	2/71	17/6333	0.0151185	0.11522	0.0957816	S100A10/NRP1	2	down	CD4 T subtypes
GO:0010769	GO:0010769	regulation of cell morphogenesis involved in differentiation	2/71	18/6333	0.0168862	0.120461	0.100139	S100A10/NRP1	2	down	CD4 T subtypes
GO:0030038	GO:0030038	contractile actin filament bundle assembly	2/71	18/6333	0.0168862	0.120461	0.100139	S100A10/NRP1	2	down	CD4 T subtypes
GO:0030516	GO:0030516	regulation of axon extension	2/71	18/6333	0.0168862	0.120461	0.100139	MT3/NRP1	2	down	CD4 T subtypes
GO:0043149	GO:0043149	stress fiber assembly	2/71	18/6333	0.0168862	0.120461	0.100139	S100A10/NRP1	2	down	CD4 T subtypes
GO:0048640	GO:0048640	negative regulation of developmental growth	2/71	18/6333	0.0168862	0.120461	0.100139	MT3/NRP1	2	down	CD4 T subtypes
GO:0072678	GO:0072678	T cell migration	2/71	18/6333	0.0168862	0.120461	0.100139	CCR2/GPR183	2	down	CD4 T subtypes
GO:0046634	GO:0046634	regulation of alpha-beta T cell activation	2/71	19/6333	0.0187375	0.126323	0.105012	ANXA1/CCR2	2	down	CD4 T subtypes
GO:0048247	GO:0048247	lymphocyte chemotaxis	2/71	19/6333	0.0187375	0.126323	0.105012	CCR2/GPR183	2	down	CD4 T subtypes
GO:0050818	GO:0050818	regulation of coagulation	2/71	19/6333	0.0187375	0.126323	0.105012	CD9/ANXA5	2	down	CD4 T subtypes
GO:0110020	GO:0110020	regulation of actomyosin structure organization	2/71	19/6333	0.0187375	0.126323	0.105012	S100A10/NRP1	2	down	CD4 T subtypes
GO:2001237	GO:2001237	negative regulation of extrinsic apoptotic signaling pathway	2/71	19/6333	0.0187375	0.126323	0.105012	HMGB2/NRP1	2	down	CD4 T subtypes
GO:0051851	GO:0051851	modulation by host of symbiont process	2/71	20/6333	0.0206702	0.137094	0.113966	ANXA2/SAMHD1	2	down	CD4 T subtypes
GO:0061387	GO:0061387	regulation of extent of cell growth	2/71	22/6333	0.0247722	0.15752	0.130946	MT3/NRP1	2	down	CD4 T subtypes
GO:0002709	GO:0002709	regulation of T cell mediated immunity	2/71	23/6333	0.0269376	0.165262	0.137382	CCR2/FOXP3	2	down	CD4 T subtypes
GO:0048525	GO:0048525	negative regulation of viral process	2/71	23/6333	0.0269376	0.165262	0.137382	SAMHD1/ISG20	2	down	CD4 T subtypes
GO:0061041	GO:0061041	regulation of wound healing	2/71	23/6333	0.0269376	0.165262	0.137382	CD9/ANXA1	2	down	CD4 T subtypes
GO:0010977	GO:0010977	negative regulation of neuron projection development	2/71	24/6333	0.0291766	0.1721	0.143066	MT3/NRP1	2	down	CD4 T subtypes
GO:0030837	GO:0030837	negative regulation of actin filament polymerization	2/71	24/6333	0.0291766	0.1721	0.143066	RDX/TMSB10	2	down	CD4 T subtypes
GO:0032760	GO:0032760	positive regulation of tumor necrosis factor production	2/71	24/6333	0.0291766	0.1721	0.143066	LY96/CCR2	2	down	CD4 T subtypes
GO:0051702	GO:0051702	biological process involved in interaction with symbiont	2/71	24/6333	0.0291766	0.1721	0.143066	ANXA2/SAMHD1	2	down	CD4 T subtypes
GO:0051817	GO:0051817	modulation of process of other organism involved in symbiotic interaction	2/71	24/6333	0.0291766	0.1721	0.143066	ANXA2/SAMHD1	2	down	CD4 T subtypes
GO:0002312	GO:0002312	B cell activation involved in immune response	2/71	25/6333	0.0314874	0.179698	0.149382	GPR183/ITM2A	2	down	CD4 T subtypes
GO:0030168	GO:0030168	platelet activation	2/71	25/6333	0.0314874	0.179698	0.149382	CD9/CD40LG	2	down	CD4 T subtypes
GO:0032272	GO:0032272	negative regulation of protein polymerization	2/71	26/6333	0.0338681	0.185519	0.154221	RDX/TMSB10	2	down	CD4 T subtypes
GO:0034446	GO:0034446	substrate adhesion-dependent cell spreading	2/71	26/6333	0.0338681	0.185519	0.154221	S100A10/NRP1	2	down	CD4 T subtypes
GO:0035821	GO:0035821	modulation of process of other organism	2/71	26/6333	0.0338681	0.185519	0.154221	ANXA2/SAMHD1	2	down	CD4 T subtypes
GO:1903034	GO:1903034	regulation of response to wounding	2/71	26/6333	0.0338681	0.185519	0.154221	CD9/ANXA1	2	down	CD4 T subtypes
GO:1903557	GO:1903557	positive regulation of tumor necrosis factor superfamily cytokine production	2/71	26/6333	0.0338681	0.185519	0.154221	LY96/CCR2	2	down	CD4 T subtypes
GO:0002367	GO:0002367	cytokine production involved in immune response	2/71	27/6333	0.036317	0.191249	0.158984	CCR2/FOXP3	2	down	CD4 T subtypes
GO:0002456	GO:0002456	T cell mediated immunity	2/71	27/6333	0.036317	0.191249	0.158984	CCR2/FOXP3	2	down	CD4 T subtypes
GO:0002718	GO:0002718	regulation of cytokine production involved in immune response	2/71	27/6333	0.036317	0.191249	0.158984	CCR2/FOXP3	2	down	CD4 T subtypes
GO:0010811	GO:0010811	positive regulation of cell-substrate adhesion	2/71	27/6333	0.036317	0.191249	0.158984	S100A10/NRP1	2	down	CD4 T subtypes
GO:0050770	GO:0050770	regulation of axonogenesis	2/71	27/6333	0.036317	0.191249	0.158984	MT3/NRP1	2	down	CD4 T subtypes
GO:0031532	GO:0031532	actin cytoskeleton reorganization	2/71	28/6333	0.0388323	0.197738	0.164379	ANXA1/NRP1	2	down	CD4 T subtypes
GO:0032147	GO:0032147	activation of protein kinase activity	2/71	28/6333	0.0388323	0.197738	0.164379	MT3/IL6R	2	down	CD4 T subtypes
GO:0050768	GO:0050768	negative regulation of neurogenesis	2/71	28/6333	0.0388323	0.197738	0.164379	MT3/NRP1	2	down	CD4 T subtypes
GO:0000302	GO:0000302	response to reactive oxygen species	2/71	29/6333	0.0414122	0.20572	0.171014	GPX1/MT3	2	down	CD4 T subtypes
GO:0019079	GO:0019079	viral genome replication	2/71	29/6333	0.0414122	0.20572	0.171014	SAMHD1/ISG20	2	down	CD4 T subtypes
GO:0051017	GO:0051017	actin filament bundle assembly	2/71	29/6333	0.0414122	0.20572	0.171014	S100A10/NRP1	2	down	CD4 T subtypes
GO:0051961	GO:0051961	negative regulation of nervous system development	2/71	29/6333	0.0414122	0.20572	0.171014	MT3/NRP1	2	down	CD4 T subtypes
GO:1901890	GO:1901890	positive regulation of cell junction assembly	2/71	29/6333	0.0414122	0.20572	0.171014	S100A10/NRP1	2	down	CD4 T subtypes
GO:0045580	GO:0045580	regulation of T cell differentiation	2/71	30/6333	0.0440549	0.21709	0.180466	ANXA1/CCR2	2	down	CD4 T subtypes
GO:0031345	GO:0031345	negative regulation of cell projection organization	2/71	31/6333	0.0467589	0.226601	0.188372	MT3/NRP1	2	down	CD4 T subtypes
GO:0061572	GO:0061572	actin filament bundle organization	2/71	31/6333	0.0467589	0.226601	0.188372	S100A10/NRP1	2	down	CD4 T subtypes
GO:0072676	GO:0072676	lymphocyte migration	2/71	31/6333	0.0467589	0.226601	0.188372	CCR2/GPR183	2	down	CD4 T subtypes
GO:0031623	GO:0031623	receptor internalization	2/71	32/6333	0.0495224	0.236596	0.196682	ITGB1/CD9	2	down	CD4 T subtypes
GO:0048584	GO:0048584	positive regulation of response to stimulus	10/52	493/6333	0.00600053	0.154494	0.138801	ANXA1/GATA3/S100A4/BLK/IL6R/TXK/TNFSF14/TRPC3/RRAGD/TRAF5	10	up	CD2_GD T
GO:0007155	GO:0007155	cell adhesion	9/52	332/6333	0.00133428	0.104786	0.094142	ANXA1/SELL/GATA3/S100A10/VCL/DPP4/CASS4/IGFBP2/TNFSF14	9	up	CD2_GD T
GO:0022610	GO:0022610	biological adhesion	9/52	336/6333	0.0014512	0.104786	0.094142	ANXA1/SELL/GATA3/S100A10/VCL/DPP4/CASS4/IGFBP2/TNFSF14	9	up	CD2_GD T
GO:0002682	GO:0002682	regulation of immune system process	9/52	350/6333	0.00192761	0.111526	0.100197	ANXA1/RHEX/GATA3/BLK/DPP4/TXK/IGFBP2/TNFSF14/SAMHD1	9	up	CD2_GD T
GO:0030155	GO:0030155	regulation of cell adhesion	8/52	170/6333	6.28184e-05	0.0345753	0.0310631	ANXA1/GATA3/S100A10/VCL/DPP4/CASS4/IGFBP2/TNFSF14	8	up	CD2_GD T
GO:0080134	GO:0080134	regulation of response to stress	8/52	286/6333	0.00208501	0.115149	0.103452	ANXA1/GATA3/YBX3/TXK/TRPC3/SAMHD1/PARK7/TRAF5	8	up	CD2_GD T
GO:0044093	GO:0044093	positive regulation of molecular function	8/52	342/6333	0.00623014	0.154494	0.138801	LAPTM5/GATA3/S100A10/IL6R/CASS4/SLCO3A1/PARK7/TRAF5	8	up	CD2_GD T
GO:0016477	GO:0016477	cell migration	8/52	365/6333	0.00912079	0.181668	0.163214	ANXA1/SELL/GATA3/VCL/DPP4/CASS4/TNFSF14/CCR4	8	up	CD2_GD T
GO:0042127	GO:0042127	regulation of cell population proliferation	8/52	412/6333	0.0180381	0.250277	0.224854	S100A11/ANXA1/GATA3/DPP4/TIMP1/IL6R/IGFBP2/TRAF5	8	up	CD2_GD T
GO:0048870	GO:0048870	cell motility	8/52	412/6333	0.0180381	0.250277	0.224854	ANXA1/SELL/GATA3/VCL/DPP4/CASS4/TNFSF14/CCR4	8	up	CD2_GD T
GO:0051674	GO:0051674	localization of cell	8/52	412/6333	0.0180381	0.250277	0.224854	ANXA1/SELL/GATA3/VCL/DPP4/CASS4/TNFSF14/CCR4	8	up	CD2_GD T
GO:0040011	GO:0040011	locomotion	8/52	460/6333	0.0324278	0.285506	0.256504	ANXA1/SELL/GATA3/VCL/DPP4/CASS4/TNFSF14/CCR4	8	up	CD2_GD T
GO:0006952	GO:0006952	defense response	8/52	477/6333	0.0390365	0.302098	0.27141	ANXA1/LAPTM5/GATA3/TXK/SAMHD1/IRF5/CCR4/ALOX5AP	8	up	CD2_GD T
GO:0045785	GO:0045785	positive regulation of cell adhesion	7/52	107/6333	2.30995e-05	0.0280659	0.0252149	ANXA1/GATA3/S100A10/DPP4/CASS4/IGFBP2/TNFSF14	7	up	CD2_GD T
GO:0098609	GO:0098609	cell-cell adhesion	7/52	184/6333	0.000689979	0.0742222	0.0666826	ANXA1/SELL/GATA3/VCL/DPP4/IGFBP2/TNFSF14	7	up	CD2_GD T
GO:0002684	GO:0002684	positive regulation of immune system process	7/52	214/6333	0.0016725	0.110143	0.0989546	ANXA1/GATA3/BLK/DPP4/TXK/IGFBP2/TNFSF14	7	up	CD2_GD T
GO:0034097	GO:0034097	response to cytokine	7/52	230/6333	0.0025234	0.133301	0.11976	RHEX/YBX3/TIMP1/IL6R/TXK/IRF5/TRAF5	7	up	CD2_GD T
GO:0001775	GO:0001775	cell activation	7/52	269/6333	0.00599417	0.154494	0.138801	ANXA1/GATA3/DPP4/IL6R/TXK/IGFBP2/TNFSF14	7	up	CD2_GD T
GO:0051094	GO:0051094	positive regulation of developmental process	7/52	318/6333	0.0143972	0.225581	0.202666	ANXA1/RHEX/GATA3/S100A10/YBX3/CASS4/TNFSF14	7	up	CD2_GD T
GO:1901700	GO:1901700	response to oxygen-containing compound	7/52	332/6333	0.0178799	0.250277	0.224854	VIM/IGFBP2/TRPC3/RRAGD/MGST1/PARK7/PLK3	7	up	CD2_GD T
GO:0009719	GO:0009719	response to endogenous stimulus	7/52	339/6333	0.0198298	0.255035	0.229128	ANXA1/GATA3/TIMP1/VIM/IGFBP2/RRAGD/PARK7	7	up	CD2_GD T
GO:0045595	GO:0045595	regulation of cell differentiation	7/52	357/6333	0.0255268	0.262839	0.23614	ANXA1/RHEX/GATA3/S100A10/VCL/CASS4/TNFSF14	7	up	CD2_GD T
GO:0010647	GO:0010647	positive regulation of cell communication	7/52	375/6333	0.0322723	0.285506	0.256504	GATA3/S100A4/BLK/IL6R/TXK/RRAGD/TRAF5	7	up	CD2_GD T
GO:0023056	GO:0023056	positive regulation of signaling	7/52	379/6333	0.0339212	0.288262	0.25898	GATA3/S100A4/BLK/IL6R/TXK/RRAGD/TRAF5	7	up	CD2_GD T
GO:0007010	GO:0007010	cytoskeleton organization	7/52	387/6333	0.0373882	0.293075	0.263304	CAPG/ANXA1/S100A10/CASS4/VIM/PLK3/PFN2	7	up	CD2_GD T
GO:0009607	GO:0009607	response to biotic stimulus	7/52	400/6333	0.0435148	0.325991	0.292876	ANXA1/S100A6/LAPTM5/TXK/VIM/SAMHD1/IRF5	7	up	CD2_GD T
GO:0050865	GO:0050865	regulation of cell activation	6/52	136/6333	0.000794147	0.0742222	0.0666826	ANXA1/GATA3/DPP4/TXK/IGFBP2/TNFSF14	6	up	CD2_GD T
GO:0042110	GO:0042110	T cell activation	6/52	153/6333	0.00146615	0.104786	0.094142	ANXA1/GATA3/DPP4/IL6R/IGFBP2/TNFSF14	6	up	CD2_GD T
GO:0045597	GO:0045597	positive regulation of cell differentiation	6/52	198/6333	0.00532098	0.154494	0.138801	ANXA1/RHEX/GATA3/S100A10/CASS4/TNFSF14	6	up	CD2_GD T
GO:0046649	GO:0046649	lymphocyte activation	6/52	203/6333	0.00600162	0.154494	0.138801	ANXA1/GATA3/DPP4/IL6R/IGFBP2/TNFSF14	6	up	CD2_GD T
GO:0009628	GO:0009628	response to abiotic stimulus	6/52	204/6333	0.00614507	0.154494	0.138801	GATA3/YBX3/TIMP1/UCP2/PLK3/TRPV2	6	up	CD2_GD T
GO:0097435	GO:0097435	supramolecular fiber organization	6/52	211/6333	0.00722068	0.162868	0.146324	CAPG/S100A10/CASS4/VIM/PLK3/PFN2	6	up	CD2_GD T
GO:0071345	GO:0071345	cellular response to cytokine stimulus	6/52	213/6333	0.00755171	0.163845	0.147202	RHEX/YBX3/IL6R/TXK/IRF5/TRAF5	6	up	CD2_GD T
GO:0008284	GO:0008284	positive regulation of cell population proliferation	6/52	234/6333	0.0117239	0.203493	0.182822	ANXA1/DPP4/TIMP1/IL6R/IGFBP2/TRAF5	6	up	CD2_GD T
GO:0045321	GO:0045321	leukocyte activation	6/52	238/6333	0.0126738	0.216882	0.194851	ANXA1/GATA3/DPP4/IL6R/IGFBP2/TNFSF14	6	up	CD2_GD T
GO:0032270	GO:0032270	positive regulation of cellular protein metabolic process	6/52	322/6333	0.0469312	0.328148	0.294814	LAPTM5/IL6R/CASS4/SLCO3A1/PARK7/PLK3	6	up	CD2_GD T
GO:0050870	GO:0050870	positive regulation of T cell activation	5/52	56/6333	8.53711e-05	0.0345753	0.0310631	ANXA1/GATA3/DPP4/IGFBP2/TNFSF14	5	up	CD2_GD T
GO:1903039	GO:1903039	positive regulation of leukocyte cell-cell adhesion	5/52	60/6333	0.000119076	0.0361694	0.0324953	ANXA1/GATA3/DPP4/IGFBP2/TNFSF14	5	up	CD2_GD T
GO:0022409	GO:0022409	positive regulation of cell-cell adhesion	5/52	70/6333	0.000248042	0.0502285	0.0451263	ANXA1/GATA3/DPP4/IGFBP2/TNFSF14	5	up	CD2_GD T
GO:0051251	GO:0051251	positive regulation of lymphocyte activation	5/52	70/6333	0.000248042	0.0502285	0.0451263	ANXA1/GATA3/DPP4/IGFBP2/TNFSF14	5	up	CD2_GD T
GO:1903037	GO:1903037	regulation of leukocyte cell-cell adhesion	5/52	76/6333	0.000364832	0.0633244	0.0568918	ANXA1/GATA3/DPP4/IGFBP2/TNFSF14	5	up	CD2_GD T
GO:0002696	GO:0002696	positive regulation of leukocyte activation	5/52	82/6333	0.000519192	0.0667118	0.0599352	ANXA1/GATA3/DPP4/IGFBP2/TNFSF14	5	up	CD2_GD T
GO:0050863	GO:0050863	regulation of T cell activation	5/52	83/6333	0.000549069	0.0667118	0.0599352	ANXA1/GATA3/DPP4/IGFBP2/TNFSF14	5	up	CD2_GD T
GO:0050867	GO:0050867	positive regulation of cell activation	5/52	83/6333	0.000549069	0.0667118	0.0599352	ANXA1/GATA3/DPP4/IGFBP2/TNFSF14	5	up	CD2_GD T
GO:0007159	GO:0007159	leukocyte cell-cell adhesion	5/52	89/6333	0.000756373	0.0742222	0.0666826	ANXA1/GATA3/DPP4/IGFBP2/TNFSF14	5	up	CD2_GD T
GO:0022407	GO:0022407	regulation of cell-cell adhesion	5/52	99/6333	0.00122526	0.104786	0.094142	ANXA1/GATA3/DPP4/IGFBP2/TNFSF14	5	up	CD2_GD T
GO:0051249	GO:0051249	regulation of lymphocyte activation	5/52	107/6333	0.00173341	0.110143	0.0989546	ANXA1/GATA3/DPP4/IGFBP2/TNFSF14	5	up	CD2_GD T
GO:0002694	GO:0002694	regulation of leukocyte activation	5/52	128/6333	0.00378995	0.154494	0.138801	ANXA1/GATA3/DPP4/IGFBP2/TNFSF14	5	up	CD2_GD T
GO:0019221	GO:0019221	cytokine-mediated signaling pathway	5/52	138/6333	0.00522096	0.154494	0.138801	RHEX/IL6R/TXK/IRF5/TRAF5	5	up	CD2_GD T
GO:0030334	GO:0030334	regulation of cell migration	5/52	194/6333	0.020765	0.257026	0.230917	ANXA1/GATA3/VCL/CASS4/TNFSF14	5	up	CD2_GD T
GO:0001816	GO:0001816	cytokine production	5/52	200/6333	0.023346	0.257867	0.231673	ANXA1/GATA3/IL6R/TXK/PARK7	5	up	CD2_GD T
GO:0030036	GO:0030036	actin cytoskeleton organization	5/52	204/6333	0.0251781	0.261465	0.234905	CAPG/ANXA1/S100A10/CASS4/PFN2	5	up	CD2_GD T
GO:0032101	GO:0032101	regulation of response to external stimulus	5/52	209/6333	0.0275963	0.266704	0.239612	ANXA1/GATA3/TXK/TNFSF14/SAMHD1	5	up	CD2_GD T
GO:2000145	GO:2000145	regulation of cell motility	5/52	210/6333	0.0280972	0.266704	0.239612	ANXA1/GATA3/VCL/CASS4/TNFSF14	5	up	CD2_GD T
GO:0043069	GO:0043069	negative regulation of programmed cell death	5/52	214/6333	0.0301591	0.276588	0.248492	LAPTM5/GATA3/YBX3/PARK7/PLK3	5	up	CD2_GD T
GO:0040012	GO:0040012	regulation of locomotion	5/52	221/6333	0.0339945	0.288262	0.25898	ANXA1/GATA3/VCL/CASS4/TNFSF14	5	up	CD2_GD T
GO:0050776	GO:0050776	regulation of immune response	5/52	221/6333	0.0339945	0.288262	0.25898	ANXA1/GATA3/BLK/TXK/SAMHD1	5	up	CD2_GD T
GO:0030029	GO:0030029	actin filament-based process	5/52	222/6333	0.0345662	0.288262	0.25898	CAPG/ANXA1/S100A10/CASS4/PFN2	5	up	CD2_GD T
GO:0051270	GO:0051270	regulation of cellular component movement	5/52	223/6333	0.035144	0.288514	0.259206	ANXA1/GATA3/VCL/CASS4/TNFSF14	5	up	CD2_GD T
GO:0060548	GO:0060548	negative regulation of cell death	5/52	225/6333	0.0363177	0.293075	0.263304	LAPTM5/GATA3/YBX3/PARK7/PLK3	5	up	CD2_GD T
GO:0044087	GO:0044087	regulation of cellular component biogenesis	5/52	243/6333	0.0479818	0.328148	0.294814	CAPG/S100A10/VCL/PARK7/PFN2	5	up	CD2_GD T
GO:0050900	GO:0050900	leukocyte migration	4/52	88/6333	0.00567107	0.154494	0.138801	ANXA1/SELL/GATA3/TNFSF14	4	up	CD2_GD T
GO:0071396	GO:0071396	cellular response to lipid	4/52	117/6333	0.0151514	0.22727	0.204184	ANXA1/VIM/MGST1/PARK7	4	up	CD2_GD T
GO:0007015	GO:0007015	actin filament organization	4/52	129/6333	0.0209429	0.257026	0.230917	CAPG/S100A10/CASS4/PFN2	4	up	CD2_GD T
GO:0050778	GO:0050778	positive regulation of immune response	4/52	132/6333	0.022577	0.257867	0.231673	ANXA1/GATA3/BLK/TXK	4	up	CD2_GD T
GO:0001819	GO:0001819	positive regulation of cytokine production	4/52	133/6333	0.0231386	0.257867	0.231673	ANXA1/GATA3/TXK/PARK7	4	up	CD2_GD T
GO:0031347	GO:0031347	regulation of defense response	4/52	134/6333	0.0237087	0.259206	0.232876	ANXA1/GATA3/TXK/SAMHD1	4	up	CD2_GD T
GO:0010817	GO:0010817	regulation of hormone levels	4/52	138/6333	0.026075	0.264009	0.237191	ANXA1/GATA3/BLK/CGA	4	up	CD2_GD T
GO:0030162	GO:0030162	regulation of proteolysis	4/52	140/6333	0.0273099	0.266704	0.239612	LAPTM5/TIMP1/PARK7/PLK3	4	up	CD2_GD T
GO:0032880	GO:0032880	regulation of protein localization	4/52	159/6333	0.0407944	0.311731	0.280065	BLK/VCL/PARK7/PLK3	4	up	CD2_GD T
GO:0033993	GO:0033993	response to lipid	4/52	166/6333	0.0465717	0.328148	0.294814	ANXA1/VIM/MGST1/PARK7	4	up	CD2_GD T
GO:0050851	GO:0050851	antigen receptor-mediated signaling pathway	3/52	30/6333	0.00181305	0.110143	0.0989546	GATA3/BLK/TXK	3	up	CD2_GD T
GO:0051099	GO:0051099	positive regulation of binding	3/52	35/6333	0.00283956	0.133331	0.119787	GATA3/S100A10/PARK7	3	up	CD2_GD T
GO:0018958	GO:0018958	phenol-containing compound metabolic process	3/52	40/6333	0.0041646	0.154494	0.138801	GATA3/CGA/PARK7	3	up	CD2_GD T
GO:0071674	GO:0071674	mononuclear cell migration	3/52	40/6333	0.0041646	0.154494	0.138801	ANXA1/GATA3/TNFSF14	3	up	CD2_GD T
GO:0002429	GO:0002429	immune response-activating cell surface receptor signaling pathway	3/52	41/6333	0.00446757	0.154494	0.138801	GATA3/BLK/TXK	3	up	CD2_GD T
GO:0002757	GO:0002757	immune response-activating signal transduction	3/52	41/6333	0.00446757	0.154494	0.138801	GATA3/BLK/TXK	3	up	CD2_GD T
GO:0002768	GO:0002768	immune response-regulating cell surface receptor signaling pathway	3/52	44/6333	0.00545543	0.154494	0.138801	GATA3/BLK/TXK	3	up	CD2_GD T
GO:0010810	GO:0010810	regulation of cell-substrate adhesion	3/52	50/6333	0.0077997	0.166257	0.149368	S100A10/VCL/CASS4	3	up	CD2_GD T
GO:0062197	GO:0062197	cellular response to chemical stress	3/52	57/6333	0.0111852	0.201293	0.180846	YBX3/MGST1/PARK7	3	up	CD2_GD T
GO:0031330	GO:0031330	negative regulation of cellular catabolic process	3/52	60/6333	0.0128583	0.216983	0.194942	TIMP1/PARK7/TRAF5	3	up	CD2_GD T
GO:0071214	GO:0071214	cellular response to abiotic stimulus	3/52	63/6333	0.0146674	0.225581	0.202666	GATA3/YBX3/TIMP1	3	up	CD2_GD T
GO:0104004	GO:0104004	cellular response to environmental stimulus	3/52	63/6333	0.0146674	0.225581	0.202666	GATA3/YBX3/TIMP1	3	up	CD2_GD T
GO:0009566	GO:0009566	fertilization	3/52	65/6333	0.0159498	0.236329	0.212322	YBX3/TRPC3/PARK7	3	up	CD2_GD T
GO:0030217	GO:0030217	T cell differentiation	3/52	69/6333	0.0186992	0.250277	0.224854	ANXA1/GATA3/IL6R	3	up	CD2_GD T
GO:0022604	GO:0022604	regulation of cell morphogenesis	3/52	70/6333	0.0194252	0.253781	0.228001	ANXA1/S100A10/CASS4	3	up	CD2_GD T
GO:0009895	GO:0009895	negative regulation of catabolic process	3/52	71/6333	0.0201667	0.255035	0.229128	TIMP1/PARK7/TRAF5	3	up	CD2_GD T
GO:0051098	GO:0051098	regulation of binding	3/52	71/6333	0.0201667	0.255035	0.229128	GATA3/S100A10/PARK7	3	up	CD2_GD T
GO:0006575	GO:0006575	cellular modified amino acid metabolic process	3/52	73/6333	0.0216963	0.25731	0.231173	GATA3/CGA/PARK7	3	up	CD2_GD T
GO:0018108	GO:0018108	peptidyl-tyrosine phosphorylation	3/52	74/6333	0.0224844	0.257867	0.231673	IL6R/TXK/CASS4	3	up	CD2_GD T
GO:0052548	GO:0052548	regulation of endopeptidase activity	3/52	74/6333	0.0224844	0.257867	0.231673	LAPTM5/TIMP1/PARK7	3	up	CD2_GD T
GO:0018212	GO:0018212	peptidyl-tyrosine modification	3/52	76/6333	0.0241073	0.259206	0.232876	IL6R/TXK/CASS4	3	up	CD2_GD T
GO:0031589	GO:0031589	cell-substrate adhesion	3/52	76/6333	0.0241073	0.259206	0.232876	S100A10/VCL/CASS4	3	up	CD2_GD T
GO:0051091	GO:0051091	positive regulation of DNA-binding transcription factor activity	3/52	77/6333	0.024942	0.261246	0.234709	SLCO3A1/PARK7/TRAF5	3	up	CD2_GD T
GO:0052547	GO:0052547	regulation of peptidase activity	3/52	78/6333	0.0257923	0.263342	0.236591	LAPTM5/TIMP1/PARK7	3	up	CD2_GD T
GO:0110053	GO:0110053	regulation of actin filament organization	3/52	79/6333	0.0266582	0.265489	0.238521	CAPG/S100A10/PFN2	3	up	CD2_GD T
GO:0002253	GO:0002253	activation of immune response	3/52	80/6333	0.0275396	0.266704	0.239612	GATA3/BLK/TXK	3	up	CD2_GD T
GO:0006979	GO:0006979	response to oxidative stress	3/52	81/6333	0.0284365	0.267832	0.240625	MGST1/PARK7/PLK3	3	up	CD2_GD T
GO:1903706	GO:1903706	regulation of hemopoiesis	3/52	83/6333	0.0302768	0.276588	0.248492	ANXA1/RHEX/GATA3	3	up	CD2_GD T
GO:0009314	GO:0009314	response to radiation	3/52	90/6333	0.0372031	0.293075	0.263304	GATA3/TIMP1/PLK3	3	up	CD2_GD T
GO:0042060	GO:0042060	wound healing	3/52	90/6333	0.0372031	0.293075	0.263304	ANXA1/TXK/F2R	3	up	CD2_GD T
GO:0042176	GO:0042176	regulation of protein catabolic process	3/52	96/6333	0.0437337	0.325991	0.292876	TIMP1/PARK7/PLK3	3	up	CD2_GD T
GO:0032956	GO:0032956	regulation of actin cytoskeleton organization	3/52	97/6333	0.0448747	0.328148	0.294814	CAPG/S100A10/PFN2	3	up	CD2_GD T
GO:0051223	GO:0051223	regulation of protein transport	3/52	97/6333	0.0448747	0.328148	0.294814	BLK/PARK7/PLK3	3	up	CD2_GD T
GO:0060326	GO:0060326	cell chemotaxis	3/52	97/6333	0.0448747	0.328148	0.294814	ANXA1/TNFSF14/CCR4	3	up	CD2_GD T
GO:0002764	GO:0002764	immune response-regulating signaling pathway	3/52	99/6333	0.0472012	0.328148	0.294814	GATA3/BLK/TXK	3	up	CD2_GD T
GO:0006590	GO:0006590	thyroid hormone generation	2/52	10/6333	0.00285318	0.133331	0.119787	GATA3/CGA	2	up	CD2_GD T
GO:0031295	GO:0031295	T cell costimulation	2/52	10/6333	0.00285318	0.133331	0.119787	DPP4/TNFSF14	2	up	CD2_GD T
GO:0031294	GO:0031294	lymphocyte costimulation	2/52	11/6333	0.00346894	0.154494	0.138801	DPP4/TNFSF14	2	up	CD2_GD T
GO:1900026	GO:1900026	positive regulation of substrate adhesion-dependent cell spreading	2/52	12/6333	0.00414092	0.154494	0.138801	S100A10/CASS4	2	up	CD2_GD T
GO:0043388	GO:0043388	positive regulation of DNA binding	2/52	14/6333	0.00564984	0.154494	0.138801	GATA3/PARK7	2	up	CD2_GD T
GO:0051893	GO:0051893	regulation of focal adhesion assembly	2/52	14/6333	0.00564984	0.154494	0.138801	S100A10/VCL	2	up	CD2_GD T
GO:0090109	GO:0090109	regulation of cell-substrate junction assembly	2/52	14/6333	0.00564984	0.154494	0.138801	S100A10/VCL	2	up	CD2_GD T
GO:0006584	GO:0006584	catecholamine metabolic process	2/52	15/6333	0.00648494	0.154494	0.138801	GATA3/PARK7	2	up	CD2_GD T
GO:0009309	GO:0009309	amine biosynthetic process	2/52	15/6333	0.00648494	0.154494	0.138801	GATA3/PARK7	2	up	CD2_GD T
GO:0009712	GO:0009712	catechol-containing compound metabolic process	2/52	15/6333	0.00648494	0.154494	0.138801	GATA3/PARK7	2	up	CD2_GD T
GO:0010770	GO:0010770	positive regulation of cell morphogenesis involved in differentiation	2/52	15/6333	0.00648494	0.154494	0.138801	S100A10/CASS4	2	up	CD2_GD T
GO:0042401	GO:0042401	cellular biogenic amine biosynthetic process	2/52	15/6333	0.00648494	0.154494	0.138801	GATA3/PARK7	2	up	CD2_GD T
GO:1900024	GO:1900024	regulation of substrate adhesion-dependent cell spreading	2/52	15/6333	0.00648494	0.154494	0.138801	S100A10/CASS4	2	up	CD2_GD T
GO:0006970	GO:0006970	response to osmotic stress	2/52	16/6333	0.00737262	0.162868	0.146324	YBX3/PLK3	2	up	CD2_GD T
GO:0042403	GO:0042403	thyroid hormone metabolic process	2/52	16/6333	0.00737262	0.162868	0.146324	GATA3/CGA	2	up	CD2_GD T
GO:0150116	GO:0150116	regulation of cell-substrate junction organization	2/52	16/6333	0.00737262	0.162868	0.146324	S100A10/VCL	2	up	CD2_GD T
GO:0045582	GO:0045582	positive regulation of T cell differentiation	2/52	17/6333	0.00831198	0.168318	0.15122	ANXA1/GATA3	2	up	CD2_GD T
GO:0046189	GO:0046189	phenol-containing compound biosynthetic process	2/52	17/6333	0.00831198	0.168318	0.15122	GATA3/PARK7	2	up	CD2_GD T
GO:0048041	GO:0048041	focal adhesion assembly	2/52	17/6333	0.00831198	0.168318	0.15122	S100A10/VCL	2	up	CD2_GD T
GO:0010769	GO:0010769	regulation of cell morphogenesis involved in differentiation	2/52	18/6333	0.00930215	0.182292	0.163775	S100A10/CASS4	2	up	CD2_GD T
GO:0042093	GO:0042093	T-helper cell differentiation	2/52	19/6333	0.0103423	0.196342	0.176397	ANXA1/IL6R	2	up	CD2_GD T
GO:2000677	GO:2000677	regulation of transcription regulatory region DNA binding	2/52	19/6333	0.0103423	0.196342	0.176397	GATA3/PARK7	2	up	CD2_GD T
GO:0002287	GO:0002287	alpha-beta T cell activation involved in immune response	2/52	20/6333	0.0114315	0.201293	0.180846	ANXA1/IL6R	2	up	CD2_GD T
GO:0002293	GO:0002293	alpha-beta T cell differentiation involved in immune response	2/52	20/6333	0.0114315	0.201293	0.180846	ANXA1/IL6R	2	up	CD2_GD T
GO:0002294	GO:0002294	CD4-positive, alpha-beta T cell differentiation involved in immune response	2/52	20/6333	0.0114315	0.201293	0.180846	ANXA1/IL6R	2	up	CD2_GD T
GO:0007044	GO:0007044	cell-substrate junction assembly	2/52	20/6333	0.0114315	0.201293	0.180846	S100A10/VCL	2	up	CD2_GD T
GO:0002292	GO:0002292	T cell differentiation involved in immune response	2/52	22/6333	0.0137538	0.21988	0.197544	ANXA1/IL6R	2	up	CD2_GD T
GO:0045621	GO:0045621	positive regulation of lymphocyte differentiation	2/52	22/6333	0.0137538	0.21988	0.197544	ANXA1/GATA3	2	up	CD2_GD T
GO:0050852	GO:0050852	T cell receptor signaling pathway	2/52	22/6333	0.0137538	0.21988	0.197544	GATA3/TXK	2	up	CD2_GD T
GO:0150115	GO:0150115	cell-substrate junction organization	2/52	22/6333	0.0137538	0.21988	0.197544	S100A10/VCL	2	up	CD2_GD T
GO:0043367	GO:0043367	CD4-positive, alpha-beta T cell differentiation	2/52	23/6333	0.0149852	0.22727	0.204184	ANXA1/IL6R	2	up	CD2_GD T
GO:2001243	GO:2001243	negative regulation of intrinsic apoptotic signaling pathway	2/52	24/6333	0.0162625	0.238059	0.213877	YBX3/PARK7	2	up	CD2_GD T
GO:0001952	GO:0001952	regulation of cell-matrix adhesion	2/52	26/6333	0.018951	0.250277	0.224854	S100A10/VCL	2	up	CD2_GD T
GO:0034446	GO:0034446	substrate adhesion-dependent cell spreading	2/52	26/6333	0.018951	0.250277	0.224854	S100A10/CASS4	2	up	CD2_GD T
GO:0035710	GO:0035710	CD4-positive, alpha-beta T cell activation	2/52	26/6333	0.018951	0.250277	0.224854	ANXA1/IL6R	2	up	CD2_GD T
GO:0042177	GO:0042177	negative regulation of protein catabolic process	2/52	26/6333	0.018951	0.250277	0.224854	TIMP1/PARK7	2	up	CD2_GD T
GO:0010811	GO:0010811	positive regulation of cell-substrate adhesion	2/52	27/6333	0.0203608	0.255035	0.229128	S100A10/CASS4	2	up	CD2_GD T
GO:0010469	GO:0010469	regulation of signaling receptor activity	2/52	28/6333	0.0218132	0.25731	0.231173	CGA/PARK7	2	up	CD2_GD T
GO:0031532	GO:0031532	actin cytoskeleton reorganization	2/52	28/6333	0.0218132	0.25731	0.231173	ANXA1/CASS4	2	up	CD2_GD T
GO:0046632	GO:0046632	alpha-beta T cell differentiation	2/52	28/6333	0.0218132	0.25731	0.231173	ANXA1/IL6R	2	up	CD2_GD T
GO:0000302	GO:0000302	response to reactive oxygen species	2/52	29/6333	0.0233074	0.257867	0.231673	PARK7/PLK3	2	up	CD2_GD T
GO:0009266	GO:0009266	response to temperature stimulus	2/52	29/6333	0.0233074	0.257867	0.231673	UCP2/TRPV2	2	up	CD2_GD T
GO:0045580	GO:0045580	regulation of T cell differentiation	2/52	30/6333	0.0248427	0.261246	0.234709	ANXA1/GATA3	2	up	CD2_GD T
GO:0051101	GO:0051101	regulation of DNA binding	2/52	30/6333	0.0248427	0.261246	0.234709	GATA3/PARK7	2	up	CD2_GD T
GO:0072676	GO:0072676	lymphocyte migration	2/52	31/6333	0.0264183	0.265275	0.238328	GATA3/TNFSF14	2	up	CD2_GD T
GO:0006576	GO:0006576	cellular biogenic amine metabolic process	2/52	32/6333	0.0280336	0.266704	0.239612	GATA3/PARK7	2	up	CD2_GD T
GO:0032434	GO:0032434	regulation of proteasomal ubiquitin-dependent protein catabolic process	2/52	32/6333	0.0280336	0.266704	0.239612	PARK7/PLK3	2	up	CD2_GD T
GO:0010466	GO:0010466	negative regulation of peptidase activity	2/52	33/6333	0.0296877	0.275348	0.247378	TIMP1/PARK7	2	up	CD2_GD T
GO:0010951	GO:0010951	negative regulation of endopeptidase activity	2/52	33/6333	0.0296877	0.275348	0.247378	TIMP1/PARK7	2	up	CD2_GD T
GO:0042102	GO:0042102	positive regulation of T cell proliferation	2/52	34/6333	0.03138	0.280343	0.251866	ANXA1/IGFBP2	2	up	CD2_GD T
GO:1902107	GO:1902107	positive regulation of leukocyte differentiation	2/52	34/6333	0.03138	0.280343	0.251866	ANXA1/GATA3	2	up	CD2_GD T
GO:1903708	GO:1903708	positive regulation of hemopoiesis	2/52	34/6333	0.03138	0.280343	0.251866	ANXA1/GATA3	2	up	CD2_GD T
GO:0030856	GO:0030856	regulation of epithelial cell differentiation	2/52	35/6333	0.0331097	0.287345	0.258156	GATA3/VCL	2	up	CD2_GD T
GO:0044106	GO:0044106	cellular amine metabolic process	2/52	35/6333	0.0331097	0.287345	0.258156	GATA3/PARK7	2	up	CD2_GD T
GO:0009308	GO:0009308	amine metabolic process	2/52	36/6333	0.0348762	0.288262	0.25898	GATA3/PARK7	2	up	CD2_GD T
GO:0033157	GO:0033157	regulation of intracellular protein transport	2/52	36/6333	0.0348762	0.288262	0.25898	PARK7/PLK3	2	up	CD2_GD T
GO:0046631	GO:0046631	alpha-beta T cell activation	2/52	36/6333	0.0348762	0.288262	0.25898	ANXA1/IL6R	2	up	CD2_GD T
GO:0007229	GO:0007229	integrin-mediated signaling pathway	2/52	37/6333	0.0366787	0.293075	0.263304	TIMP1/TXK	2	up	CD2_GD T
GO:0045619	GO:0045619	regulation of lymphocyte differentiation	2/52	37/6333	0.0366787	0.293075	0.263304	ANXA1/GATA3	2	up	CD2_GD T
GO:0071478	GO:0071478	cellular response to radiation	2/52	37/6333	0.0366787	0.293075	0.263304	GATA3/TIMP1	2	up	CD2_GD T
GO:0031929	GO:0031929	TOR signaling	2/52	38/6333	0.0385165	0.299985	0.269512	GATA3/RRAGD	2	up	CD2_GD T
GO:2000058	GO:2000058	regulation of ubiquitin-dependent protein catabolic process	2/52	39/6333	0.0403891	0.310587	0.279037	PARK7/PLK3	2	up	CD2_GD T
GO:0061136	GO:0061136	regulation of proteasomal protein catabolic process	2/52	40/6333	0.0422956	0.319188	0.286764	PARK7/PLK3	2	up	CD2_GD T
GO:2001242	GO:2001242	regulation of intrinsic apoptotic signaling pathway	2/52	40/6333	0.0422956	0.319188	0.286764	YBX3/PARK7	2	up	CD2_GD T
GO:0007160	GO:0007160	cell-matrix adhesion	2/52	42/6333	0.0462081	0.328148	0.294814	S100A10/VCL	2	up	CD2_GD T
GO:0032946	GO:0032946	positive regulation of mononuclear cell proliferation	2/52	42/6333	0.0462081	0.328148	0.294814	ANXA1/IGFBP2	2	up	CD2_GD T
GO:0050671	GO:0050671	positive regulation of lymphocyte proliferation	2/52	42/6333	0.0462081	0.328148	0.294814	ANXA1/IGFBP2	2	up	CD2_GD T
GO:0071383	GO:0071383	cellular response to steroid hormone stimulus	2/52	42/6333	0.0462081	0.328148	0.294814	ANXA1/PARK7	2	up	CD2_GD T
GO:0002685	GO:0002685	regulation of leukocyte migration	2/52	43/6333	0.0482128	0.328148	0.294814	ANXA1/TNFSF14	2	up	CD2_GD T
GO:0008584	GO:0008584	male gonad development	2/52	43/6333	0.0482128	0.328148	0.294814	GATA3/YBX3	2	up	CD2_GD T
GO:0046546	GO:0046546	development of primary male sexual characteristics	2/52	43/6333	0.0482128	0.328148	0.294814	GATA3/YBX3	2	up	CD2_GD T
GO:0070665	GO:0070665	positive regulation of leukocyte proliferation	2/52	43/6333	0.0482128	0.328148	0.294814	ANXA1/IGFBP2	2	up	CD2_GD T
GO:00488701	GO:0048870	cell motility	13/48	412/6333	7.33496e-06	0.00233741	0.00215159	FSCN1/KIT/KLRK1/CCR9/FES/RHOQ/B4GALT1/NEDD9/TGFBR3/FCER1G/JAML/GPR18/CXCR4	13	down	CD2_GD T
GO:00516741	GO:0051674	localization of cell	13/48	412/6333	7.33496e-06	0.00233741	0.00215159	FSCN1/KIT/KLRK1/CCR9/FES/RHOQ/B4GALT1/NEDD9/TGFBR3/FCER1G/JAML/GPR18/CXCR4	13	down	CD2_GD T
GO:00400111	GO:0040011	locomotion	13/48	460/6333	2.41739e-05	0.00347353	0.00319739	FSCN1/KIT/KLRK1/CCR9/FES/RHOQ/B4GALT1/NEDD9/TGFBR3/FCER1G/JAML/GPR18/CXCR4	13	down	CD2_GD T
GO:00164771	GO:0016477	cell migration	12/48	365/6333	1.18029e-05	0.00282089	0.00259663	FSCN1/KIT/KLRK1/CCR9/RHOQ/B4GALT1/NEDD9/TGFBR3/FCER1G/JAML/GPR18/CXCR4	12	down	CD2_GD T
GO:00453211	GO:0045321	leukocyte activation	9/48	238/6333	5.9768e-05	0.00571382	0.00525958	KIT/KLRK1/CCR9/FES/IKZF3/FCER1G/SOX4/JAML/GPR18	9	down	CD2_GD T
GO:00017751	GO:0001775	cell activation	9/48	269/6333	0.000153601	0.0116131	0.0106899	KIT/KLRK1/CCR9/FES/IKZF3/FCER1G/SOX4/JAML/GPR18	9	down	CD2_GD T
GO:00071551	GO:0007155	cell adhesion	9/48	332/6333	0.000731753	0.0331563	0.0305204	CD2/KIT/ITGA4/PECAM1/FES/B4GALT1/NEDD9/JAML/CXCR4	9	down	CD2_GD T
GO:00226101	GO:0022610	biological adhesion	9/48	336/6333	0.000797693	0.0331563	0.0305204	CD2/KIT/ITGA4/PECAM1/FES/B4GALT1/NEDD9/JAML/CXCR4	9	down	CD2_GD T
GO:00425921	GO:0042592	homeostatic process	9/48	467/6333	0.00751785	0.121815	0.112131	KIT/CCR9/NAPSA/CYBRD1/GPR55/SOX4/SLC11A2/GPR18/CXCR4	9	down	CD2_GD T
GO:00069351	GO:0006935	chemotaxis	8/48	163/6333	2.54723e-05	0.00347353	0.00319739	KIT/KLRK1/CCR9/FES/FCER1G/JAML/GPR18/CXCR4	8	down	CD2_GD T
GO:00423301	GO:0042330	taxis	8/48	164/6333	2.66265e-05	0.00347353	0.00319739	KIT/KLRK1/CCR9/FES/FCER1G/JAML/GPR18/CXCR4	8	down	CD2_GD T
GO:00025211	GO:0002521	leukocyte differentiation	8/48	166/6333	2.90672e-05	0.00347353	0.00319739	KIT/CCR9/FES/GPR55/IKZF3/FCER1G/SOX4/GPR18	8	down	CD2_GD T
GO:00466491	GO:0046649	lymphocyte activation	8/48	203/6333	0.000121515	0.0105608	0.00972123	KIT/KLRK1/CCR9/IKZF3/FCER1G/SOX4/JAML/GPR18	8	down	CD2_GD T
GO:00300971	GO:0030097	hemopoiesis	8/48	234/6333	0.000323316	0.0193181	0.0177824	KIT/CCR9/FES/GPR55/IKZF3/FCER1G/SOX4/GPR18	8	down	CD2_GD T
GO:00485341	GO:0048534	hematopoietic or lymphoid organ development	8/48	249/6333	0.000491413	0.0262541	0.0241669	KIT/CCR9/FES/GPR55/IKZF3/FCER1G/SOX4/GPR18	8	down	CD2_GD T
GO:00025201	GO:0002520	immune system development	8/48	263/6333	0.00070691	0.0331563	0.0305204	KIT/CCR9/FES/GPR55/IKZF3/FCER1G/SOX4/GPR18	8	down	CD2_GD T
GO:00488781	GO:0048878	chemical homeostasis	8/48	326/6333	0.00280389	0.0809095	0.0744774	CCR9/NAPSA/CYBRD1/GPR55/SOX4/SLC11A2/GPR18/CXCR4	8	down	CD2_GD T
GO:00026821	GO:0002682	regulation of immune system process	8/48	350/6333	0.00433844	0.0987512	0.0909007	TRAT1/KIT/KLRK1/FES/GPR55/IKZF3/FCER1G/GPR18	8	down	CD2_GD T
GO:00485841	GO:0048584	positive regulation of response to stimulus	8/48	493/6333	0.0302377	0.280653	0.258342	TRAT1/KIT/KLRK1/GPR55/FCER1G/SOX4/GPR18/CXCR4	8	down	CD2_GD T
GO:00603261	GO:0060326	cell chemotaxis	7/48	97/6333	7.00937e-06	0.00233741	0.00215159	KIT/KLRK1/CCR9/FCER1G/JAML/GPR18/CXCR4	7	down	CD2_GD T
GO:19031311	GO:1903131	mononuclear cell differentiation	7/48	134/6333	5.79701e-05	0.00571382	0.00525958	KIT/CCR9/FES/IKZF3/FCER1G/SOX4/GPR18	7	down	CD2_GD T
GO:00300361	GO:0030036	actin cytoskeleton organization	7/48	204/6333	0.000777843	0.0331563	0.0305204	FSCN1/KIT/TPM1/FES/RHOQ/NEDD9/NCK1	7	down	CD2_GD T
GO:00300291	GO:0030029	actin filament-based process	7/48	222/6333	0.00127898	0.0468327	0.0431096	FSCN1/KIT/TPM1/FES/RHOQ/NEDD9/NCK1	7	down	CD2_GD T
GO:00070101	GO:0007010	cytoskeleton organization	7/48	387/6333	0.0253086	0.249434	0.229604	FSCN1/KIT/TPM1/FES/RHOQ/NEDD9/NCK1	7	down	CD2_GD T
GO:00510491	GO:0051049	regulation of transport	7/48	407/6333	0.0321991	0.290399	0.267313	TRAT1/PKIG/FES/RHOQ/FCER1G/SOX4/RAB4A	7	down	CD2_GD T
GO:00507901	GO:0050790	regulation of catalytic activity	7/48	423/6333	0.0385578	0.332083	0.305683	KIT/KLRK1/PKIG/BAG2/GPR55/NEDD9/SCARB2	7	down	CD2_GD T
GO:00300981	GO:0030098	lymphocyte differentiation	6/48	121/6333	0.000273607	0.0186835	0.0171982	KIT/CCR9/IKZF3/FCER1G/SOX4/GPR18	6	down	CD2_GD T
GO:00421101	GO:0042110	T cell activation	6/48	153/6333	0.000956689	0.0381081	0.0350786	KIT/CCR9/FCER1G/SOX4/JAML/GPR18	6	down	CD2_GD T
GO:00550651	GO:0055065	metal ion homeostasis	6/48	195/6333	0.00329666	0.0834393	0.076806	CCR9/CYBRD1/GPR55/SLC11A2/GPR18/CXCR4	6	down	CD2_GD T
GO:00550801	GO:0055080	cation homeostasis	6/48	213/6333	0.00508649	0.10806	0.0994692	CCR9/CYBRD1/GPR55/SLC11A2/GPR18/CXCR4	6	down	CD2_GD T
GO:00987711	GO:0098771	inorganic ion homeostasis	6/48	215/6333	0.00532239	0.110613	0.10182	CCR9/CYBRD1/GPR55/SLC11A2/GPR18/CXCR4	6	down	CD2_GD T
GO:00400121	GO:0040012	regulation of locomotion	6/48	221/6333	0.00607861	0.114334	0.105245	KIT/KLRK1/FES/NEDD9/GPR18/CXCR4	6	down	CD2_GD T
GO:00550821	GO:0055082	cellular chemical homeostasis	6/48	221/6333	0.00607861	0.114334	0.105245	CCR9/CYBRD1/GPR55/SOX4/GPR18/CXCR4	6	down	CD2_GD T
GO:00512701	GO:0051270	regulation of cellular component movement	6/48	223/6333	0.00634739	0.114334	0.105245	KIT/KLRK1/FES/NEDD9/TGFBR3/GPR18	6	down	CD2_GD T
GO:00508011	GO:0050801	ion homeostasis	6/48	225/6333	0.00662479	0.115151	0.105997	CCR9/CYBRD1/GPR55/SLC11A2/GPR18/CXCR4	6	down	CD2_GD T
GO:00197251	GO:0019725	cellular homeostasis	6/48	250/6333	0.0108835	0.153009	0.140845	CCR9/CYBRD1/GPR55/SOX4/GPR18/CXCR4	6	down	CD2_GD T
GO:00071671	GO:0007167	enzyme linked receptor protein signaling pathway	6/48	252/6333	0.0112926	0.15646	0.144021	KIT/FES/RHOQ/NEDD9/TGFBR3/IGFBP4	6	down	CD2_GD T
GO:00099671	GO:0009967	positive regulation of signal transduction	6/48	335/6333	0.039459	0.336811	0.310035	TRAT1/KIT/GPR55/SOX4/GPR18/CXCR4	6	down	CD2_GD T
GO:00302171	GO:0030217	T cell differentiation	5/48	69/6333	0.000157919	0.0116131	0.0106899	KIT/CCR9/FCER1G/SOX4/GPR18	5	down	CD2_GD T
GO:00509001	GO:0050900	leukocyte migration	5/48	88/6333	0.000494324	0.0262541	0.0241669	KLRK1/B4GALT1/FCER1G/JAML/GPR18	5	down	CD2_GD T
GO:00071691	GO:0007169	transmembrane receptor protein tyrosine kinase signaling pathway	5/48	167/6333	0.00822995	0.128981	0.118727	KIT/FES/RHOQ/NEDD9/IGFBP4	5	down	CD2_GD T
GO:00068751	GO:0006875	cellular metal ion homeostasis	5/48	170/6333	0.00885501	0.130323	0.119963	CCR9/CYBRD1/GPR55/GPR18/CXCR4	5	down	CD2_GD T
GO:00300031	GO:0030003	cellular cation homeostasis	5/48	186/6333	0.0127539	0.17145	0.15782	CCR9/CYBRD1/GPR55/GPR18/CXCR4	5	down	CD2_GD T
GO:00068731	GO:0006873	cellular ion homeostasis	5/48	188/6333	0.0133118	0.174329	0.160471	CCR9/CYBRD1/GPR55/GPR18/CXCR4	5	down	CD2_GD T
GO:20001451	GO:2000145	regulation of cell motility	5/48	210/6333	0.0205746	0.228066	0.209935	KIT/KLRK1/FES/NEDD9/GPR18	5	down	CD2_GD T
GO:00974351	GO:0097435	supramolecular fiber organization	5/48	211/6333	0.020956	0.228066	0.209935	FSCN1/TPM1/FES/NEDD9/NCK1	5	down	CD2_GD T
GO:00026841	GO:0002684	positive regulation of immune system process	5/48	214/6333	0.0221283	0.23467	0.216015	TRAT1/KIT/KLRK1/FES/FCER1G	5	down	CD2_GD T
GO:00507761	GO:0050776	regulation of immune response	5/48	221/6333	0.0250291	0.249248	0.229433	TRAT1/KIT/KLRK1/FES/FCER1G	5	down	CD2_GD T
GO:00027681	GO:0002768	immune response-regulating cell surface receptor signaling pathway	4/48	44/6333	0.000315749	0.0193181	0.0177824	TRAT1/KIT/KLRK1/FCER1G	4	down	CD2_GD T
GO:00305951	GO:0030595	leukocyte chemotaxis	4/48	64/6333	0.00132268	0.0468327	0.0431096	KLRK1/FCER1G/JAML/GPR18	4	down	CD2_GD T
GO:00226041	GO:0022604	regulation of cell morphogenesis	4/48	70/6333	0.00184635	0.0630398	0.0580283	KIT/FES/RHOQ/NEDD9	4	down	CD2_GD T
GO:00072041	GO:0007204	positive regulation of cytosolic calcium ion concentration	4/48	82/6333	0.00329592	0.0834393	0.076806	CCR9/GPR55/GPR18/CXCR4	4	down	CD2_GD T
GO:0002443	GO:0002443	leukocyte mediated immunity	4/48	92/6333	0.00498239	0.10806	0.0994692	KIT/KLRK1/FES/FCER1G	4	down	CD2_GD T
GO:00514801	GO:0051480	regulation of cytosolic calcium ion concentration	4/48	98/6333	0.00623153	0.114334	0.105245	CCR9/GPR55/GPR18/CXCR4	4	down	CD2_GD T
GO:00027641	GO:0002764	immune response-regulating signaling pathway	4/48	99/6333	0.0064582	0.114334	0.105245	TRAT1/KIT/KLRK1/FCER1G	4	down	CD2_GD T
GO:0006897	GO:0006897	endocytosis	4/48	121/6333	0.0129126	0.17145	0.15782	RHOQ/FCER1G/SCARB2/RAB4A	4	down	CD2_GD T
GO:0007264	GO:0007264	small GTPase mediated signal transduction	4/48	125/6333	0.0144102	0.183682	0.16908	GPR55/RHOQ/RAB4A/GPR18	4	down	CD2_GD T
GO:00068741	GO:0006874	cellular calcium ion homeostasis	4/48	128/6333	0.0156033	0.19124	0.176037	CCR9/GPR55/GPR18/CXCR4	4	down	CD2_GD T
GO:00070151	GO:0007015	actin filament organization	4/48	129/6333	0.0160144	0.191372	0.176159	FSCN1/TPM1/NEDD9/NCK1	4	down	CD2_GD T
GO:00550741	GO:0055074	calcium ion homeostasis	4/48	129/6333	0.0160144	0.191372	0.176159	CCR9/GPR55/GPR18/CXCR4	4	down	CD2_GD T
GO:00725031	GO:0072503	cellular divalent inorganic cation homeostasis	4/48	138/6333	0.0200251	0.228066	0.209935	CCR9/GPR55/GPR18/CXCR4	4	down	CD2_GD T
GO:00725071	GO:0072507	divalent inorganic cation homeostasis	4/48	140/6333	0.0209935	0.228066	0.209935	CCR9/GPR55/GPR18/CXCR4	4	down	CD2_GD T
GO:00022521	GO:0002252	immune effector process	4/48	173/6333	0.0412161	0.346774	0.319206	KIT/KLRK1/FES/FCER1G	4	down	CD2_GD T
GO:0002275	GO:0002275	myeloid cell activation involved in immune response	3/48	24/6333	0.000739678	0.0331563	0.0305204	KIT/FES/FCER1G	3	down	CD2_GD T
GO:00315321	GO:0031532	actin cytoskeleton reorganization	3/48	28/6333	0.00117203	0.0448185	0.0412555	KIT/FES/NEDD9	3	down	CD2_GD T
GO:00083601	GO:0008360	regulation of cell shape	3/48	40/6333	0.00331662	0.0834393	0.076806	KIT/FES/RHOQ	3	down	CD2_GD T
GO:00024291	GO:0002429	immune response-activating cell surface receptor signaling pathway	3/48	41/6333	0.00355955	0.0850733	0.0783102	TRAT1/KLRK1/FCER1G	3	down	CD2_GD T
GO:00027571	GO:0002757	immune response-activating signal transduction	3/48	41/6333	0.00355955	0.0850733	0.0783102	TRAT1/KLRK1/FCER1G	3	down	CD2_GD T
GO:00509201	GO:0050920	regulation of chemotaxis	3/48	50/6333	0.00624042	0.114334	0.105245	KLRK1/GPR18/CXCR4	3	down	CD2_GD T
GO:0002274	GO:0002274	myeloid leukocyte activation	3/48	53/6333	0.0073413	0.121005	0.111385	KIT/FES/FCER1G	3	down	CD2_GD T
GO:00197221	GO:0019722	calcium-mediated signaling	3/48	54/6333	0.0077322	0.1232	0.113406	TRAT1/CCR9/CXCR4	3	down	CD2_GD T
GO:0002573	GO:0002573	myeloid leukocyte differentiation	3/48	56/6333	0.00855048	0.12975	0.119435	KIT/FES/GPR55	3	down	CD2_GD T
GO:0002703	GO:0002703	regulation of leukocyte mediated immunity	3/48	56/6333	0.00855048	0.12975	0.119435	KIT/KLRK1/FES	3	down	CD2_GD T
GO:00026991	GO:0002699	positive regulation of immune effector process	3/48	60/6333	0.0103351	0.149703	0.137802	KIT/KLRK1/FES	3	down	CD2_GD T
GO:19021051	GO:1902105	regulation of leukocyte differentiation	3/48	63/6333	0.0118055	0.161229	0.148411	FES/GPR55/IKZF3	3	down	CD2_GD T
GO:00512711	GO:0051271	negative regulation of cellular component movement	3/48	67/6333	0.0139447	0.18015	0.165829	KLRK1/TGFBR3/GPR18	3	down	CD2_GD T
GO:00199321	GO:0019932	second-messenger-mediated signaling	3/48	78/6333	0.0209018	0.228066	0.209935	TRAT1/CCR9/CXCR4	3	down	CD2_GD T
GO:00022531	GO:0002253	activation of immune response	3/48	80/6333	0.0223379	0.23467	0.216015	TRAT1/KLRK1/FCER1G	3	down	CD2_GD T
GO:00026971	GO:0002697	regulation of immune effector process	3/48	81/6333	0.0230758	0.237209	0.218351	KIT/KLRK1/FES	3	down	CD2_GD T
GO:00026831	GO:0002683	negative regulation of immune system process	3/48	83/6333	0.0245913	0.247466	0.227793	KLRK1/GPR55/GPR18	3	down	CD2_GD T
GO:19037061	GO:1903706	regulation of hemopoiesis	3/48	83/6333	0.0245913	0.247466	0.227793	FES/GPR55/IKZF3	3	down	CD2_GD T
GO:0007265	GO:0007265	Ras protein signal transduction	3/48	91/6333	0.031182	0.286635	0.263848	GPR55/RAB4A/GPR18	3	down	CD2_GD T
GO:00023661	GO:0002366	leukocyte activation involved in immune response	3/48	92/6333	0.0320651	0.290399	0.267313	KIT/FES/FCER1G	3	down	CD2_GD T
GO:00022631	GO:0002263	cell activation involved in immune response	3/48	93/6333	0.0329614	0.294496	0.271084	KIT/FES/FCER1G	3	down	CD2_GD T
GO:00300991	GO:0030099	myeloid cell differentiation	3/48	106/6333	0.0457929	0.374171	0.344426	KIT/FES/GPR55	3	down	CD2_GD T
GO:0035025	GO:0035025	positive regulation of Rho protein signal transduction	2/48	10/6333	0.00243534	0.0802823	0.0739	GPR55/GPR18	2	down	CD2_GD T
GO:0002279	GO:0002279	mast cell activation involved in immune response	2/48	11/6333	0.00296217	0.0809095	0.0744774	KIT/FES	2	down	CD2_GD T
GO:0002448	GO:0002448	mast cell mediated immunity	2/48	11/6333	0.00296217	0.0809095	0.0744774	KIT/FES	2	down	CD2_GD T
GO:0043303	GO:0043303	mast cell degranulation	2/48	11/6333	0.00296217	0.0809095	0.0744774	KIT/FES	2	down	CD2_GD T
GO:0051482	GO:0051482	positive regulation of cytosolic calcium ion concentration involved in phospholipase C-activating G protein-coupled signaling pathway	2/48	11/6333	0.00296217	0.0809095	0.0744774	GPR55/GPR18	2	down	CD2_GD T
GO:1903317	GO:1903317	regulation of protein maturation	2/48	11/6333	0.00296217	0.0809095	0.0744774	BAG2/SOX4	2	down	CD2_GD T
GO:0045576	GO:0045576	mast cell activation	2/48	13/6333	0.00416049	0.0970103	0.0892982	KIT/FES	2	down	CD2_GD T
GO:0050922	GO:0050922	negative regulation of chemotaxis	2/48	14/6333	0.00483052	0.107395	0.0988571	KLRK1/GPR18	2	down	CD2_GD T
GO:0032418	GO:0032418	lysosome localization	2/48	16/6333	0.00630873	0.114334	0.105245	KIT/FES	2	down	CD2_GD T
GO:0043299	GO:0043299	leukocyte degranulation	2/48	16/6333	0.00630873	0.114334	0.105245	KIT/FES	2	down	CD2_GD T
GO:0046579	GO:0046579	positive regulation of Ras protein signal transduction	2/48	17/6333	0.0071155	0.119341	0.109853	GPR55/GPR18	2	down	CD2_GD T
GO:0051057	GO:0051057	positive regulation of small GTPase mediated signal transduction	2/48	17/6333	0.0071155	0.119341	0.109853	GPR55/GPR18	2	down	CD2_GD T
GO:19038281	GO:1903828	negative regulation of cellular protein localization	2/48	19/6333	0.0088609	0.130323	0.119963	PKIG/RHOQ	2	down	CD2_GD T
GO:0002444	GO:0002444	myeloid leukocyte mediated immunity	2/48	21/6333	0.0107776	0.153009	0.140845	KIT/FES	2	down	CD2_GD T
GO:00313971	GO:0031397	negative regulation of protein ubiquitination	2/48	25/6333	0.0151034	0.187517	0.17261	BAG2/SOX4	2	down	CD2_GD T
GO:0035023	GO:0035023	regulation of Rho protein signal transduction	2/48	25/6333	0.0151034	0.187517	0.17261	GPR55/GPR18	2	down	CD2_GD T
GO:00026881	GO:0002688	regulation of leukocyte chemotaxis	2/48	29/6333	0.0200515	0.228066	0.209935	KLRK1/GPR18	2	down	CD2_GD T
GO:0002761	GO:0002761	regulation of myeloid leukocyte differentiation	2/48	29/6333	0.0200515	0.228066	0.209935	FES/GPR55	2	down	CD2_GD T
GO:19033211	GO:1903321	negative regulation of protein modification by small protein conjugation or removal	2/48	29/6333	0.0200515	0.228066	0.209935	BAG2/SOX4	2	down	CD2_GD T
GO:0030593	GO:0030593	neutrophil chemotaxis	2/48	30/6333	0.0213811	0.229667	0.211409	FCER1G/JAML	2	down	CD2_GD T
GO:0002244	GO:0002244	hematopoietic progenitor cell differentiation	2/48	31/6333	0.0227465	0.236366	0.217575	KIT/SOX4	2	down	CD2_GD T
GO:0007200	GO:0007200	phospholipase C-activating G protein-coupled receptor signaling pathway	2/48	33/6333	0.0255824	0.249559	0.229719	GPR55/GPR18	2	down	CD2_GD T
GO:1990266	GO:1990266	neutrophil migration	2/48	34/6333	0.0270517	0.261226	0.240459	FCER1G/JAML	2	down	CD2_GD T
GO:0002705	GO:0002705	positive regulation of leukocyte mediated immunity	2/48	35/6333	0.0285544	0.267628	0.246352	KIT/KLRK1	2	down	CD2_GD T
GO:0055072	GO:0055072	iron ion homeostasis	2/48	35/6333	0.0285544	0.267628	0.246352	CYBRD1/SLC11A2	2	down	CD2_GD T
GO:00716211	GO:0071621	granulocyte chemotaxis	2/48	35/6333	0.0285544	0.267628	0.246352	FCER1G/JAML	2	down	CD2_GD T
GO:0007266	GO:0007266	Rho protein signal transduction	2/48	39/6333	0.0348889	0.305998	0.281672	GPR55/GPR18	2	down	CD2_GD T
GO:00975301	GO:0097530	granulocyte migration	2/48	39/6333	0.0348889	0.305998	0.281672	FCER1G/JAML	2	down	CD2_GD T
GO:00716741	GO:0071674	mononuclear cell migration	2/48	40/6333	0.0365506	0.317658	0.292404	KLRK1/JAML	2	down	CD2_GD T
GO:00026851	GO:0002685	regulation of leukocyte migration	2/48	43/6333	0.0417144	0.346774	0.319206	KLRK1/GPR18	2	down	CD2_GD T
GO:00987421	GO:0098742	cell-cell adhesion via plasma-membrane adhesion molecules	2/48	43/6333	0.0417144	0.346774	0.319206	PECAM1/JAML	2	down	CD2_GD T
GO:0032273	GO:0032273	positive regulation of protein polymerization	2/48	44/6333	0.0434936	0.358447	0.329951	FES/NCK1	2	down	CD2_GD T
GO:0016125	GO:0016125	sterol metabolic process	2/48	46/6333	0.0471355	0.378668	0.348565	INSIG1/FDFT1	2	down	CD2_GD T
GO:0043112	GO:0043112	receptor metabolic process	2/48	46/6333	0.0471355	0.378668	0.348565	TRAT1/FCER1G	2	down	CD2_GD T
GO:0046578	GO:0046578	regulation of Ras protein signal transduction	2/48	47/6333	0.0489973	0.390345	0.359313	GPR55/GPR18	2	down	CD2_GD T
