# Supplementary material for: Single-Cell RNA-Sequencing Reveals Heterogeneity and Transcriptional Dynamics in Porcine Circulating CD8+ T Cells
Source: Cells. 2024 Apr 16;13(8):692. doi: 10.3390/cells13080692 (PMC11049515; doi:10.3390/cells13080692)
Supplement: Supplementary file 1 [file cells-13-00692-s001.zip › Supplemental Table4.xlsx]

## Sheet: Sheet1
Supplemental Table S4. The results of GO analysis, pathway activity analysis, and KEGG analysis among CD8 T subtypes
Cluster	group	ID	Description	GeneRatio	BgRatio	pvalue	p.adjust	qvalue	geneID	Count
CD8_terminal_effector	CD8_terminal_effector	GO:0009060	aerobic respiration	15/145	72/6338	4.49705e-11	3.97508e-08	3.63992e-08	100154817/733678/808506/808503/808504/808507/492822/808513/100627128/396894/808502/808508/808510/448979/100521945	15
CD8_terminal_effector	CD8_terminal_effector	GO:0046034	ATP metabolic process	17/145	99/6338	5.59083e-11	3.97508e-08	3.63992e-08	100157880/100038002/100513629/100154817/733678/808506/808503/808504/808507/492822/808513/396823/808502/808508/808510/448979/100521945	17
CD8_terminal_effector	CD8_terminal_effector	GO:0006119	oxidative phosphorylation	13/145	56/6338	2.22732e-10	7.91814e-08	7.25052e-08	100154817/733678/808506/808503/808504/808507/492822/808513/808502/808508/808510/448979/100521945	13
CD8_terminal_effector	CD8_terminal_effector	GO:1902600	proton transmembrane transport	7/145	27/6338	1.71766e-06	0.000203542	0.000186381	100157880/100513629/100154817/733678/808506/808503/808510	7
CD8_terminal_effector	CD8_terminal_effector	GO:0034622	cellular protein-containing complex assembly	21/145	312/6338	6.9814e-06	0.000763657	0.00069927	100174964/100153175/100154518/100154462/808507/100522801/100521499/100516708/397130/100144534/397128/808502/808510/100737726/100514655/100521945/494457/641351/100038330/100155855/100037998	21
CD8_terminal_effector	CD8_terminal_effector	GO:0015986	ATP synthesis coupled proton transport	5/145	14/6338	9.91756e-06	0.000940185	0.000860914	100157880/100513629/100154817/733678/808506	5
CD8_terminal_effector	CD8_terminal_effector	GO:1990542	mitochondrial transmembrane transport	7/145	37/6338	1.644e-05	0.00146111	0.00133791	100154817/733678/808506/100302698/100158185/403155/397549	7
CD8_terminal_effector	CD8_terminal_effector	GO:0009141	nucleoside triphosphate metabolic process	7/145	42/6338	3.9148e-05	0.00309269	0.00283193	100157880/100513629/100154817/733678/808506/100621123/100523840	7
CD8_terminal_effector	CD8_terminal_effector	GO:0006839	mitochondrial transport	8/145	59/6338	5.11434e-05	0.00382768	0.00350495	100038002/100154817/733678/808506/100302698/100158185/403155/397549	8
CD8_terminal_effector	CD8_terminal_effector	GO:0007015	actin filament organization	11/145	129/6338	0.000161955	0.00885769	0.00811086	100174964/100153175/100154518/100154462/100286741/100156254/100621675/494457/100515138/100037998/397608	11
CD8_terminal_effector	CD8_terminal_effector	GO:0006897	endocytosis	10/145	121/6338	0.000416573	0.0197456	0.0180807	414396/100514408/397406/396943/397128/396979/100523840/100520876/100125540/100625256	10
CD8_terminal_effector	CD8_terminal_effector	GO:0030029	actin filament-based process	14/145	222/6338	0.000515481	0.0226393	0.0207305	100155466/100174964/100153175/100154518/100154462/100286741/100156254/100516257/100621675/494457/100523840/100515138/100037998/397608	14
CD8_terminal_effector	CD8_terminal_effector	GO:0034314	Arp2/3 complex-mediated actin nucleation	4/145	18/6338	0.000626443	0.0262	0.023991	100174964/100153175/100154518/100154462	4
CD8_terminal_effector	CD8_terminal_effector	GO:0007005	mitochondrion organization	10/145	133/6338	0.000879664	0.0338076	0.0309572	100038002/100516708/397128/808502/808510/100737726/100514655/100521945/100154143/100158185	10
CD8_terminal_effector	CD8_terminal_effector	GO:0043933	protein-containing complex subunit organization	22/145	470/6338	0.0009273	0.0347005	0.0317748	100174964/100153175/100154518/100154462/808507/100522801/100521499/100516708/397130/100144534/397128/808502/808510/100737726/100514655/100521945/494457/641351/100038330/100155855/494463/100037998	22
CD8_terminal_effector	CD8_terminal_effector	GO:0090066	regulation of anatomical structure size	11/145	159/6338	0.00097839	0.0356736	0.0326658	100174964/100153175/100154518/100154462/397636/808503/808504/448965/494457/100511850/100037998	11
CD8_terminal_effector	CD8_terminal_effector	GO:0006935	chemotaxis	11/145	163/6338	0.00119996	0.0416183	0.0381093	396613/414373/414370/100622126/397406/397130/396737/396979/100621675/100511850/100125540	11
CD8_terminal_effector	CD8_terminal_effector	GO:1905710	positive regulation of membrane permeability	3/145	10/6338	0.00125088	0.0417139	0.0381968	100038002/100624193/100158185	3
CD8_effector	CD8_effector	GO:0030036	actin cytoskeleton organization	32/245	204/6338	5.81994e-12	1.16748e-08	1.058e-08	780425/100155466/100174964/100153175/100154518/100155875/100154462/100522899/100621359/100037957/100134958/100521443/100520585/100192436/100521992/100518251/100156254/100154178/100512494/100516257/100621675/100144507/494457/100625944/396849/100144504/100523840/100515138/100151838/100233201/100037998/414388	32
CD8_effector	CD8_effector	GO:0030029	actin filament-based process	33/245	222/6338	1.20892e-11	1.21255e-08	1.09885e-08	780425/100155466/100174964/100153175/100154518/100155875/100154462/100522899/100621359/100037957/100134958/100521443/100520585/100192436/100521992/100518251/100156254/396807/100154178/100512494/100516257/100621675/100144507/494457/100625944/396849/100144504/100523840/100515138/100151838/100233201/100037998/414388	33
CD8_effector	CD8_effector	GO:0032956	regulation of actin cytoskeleton organization	18/245	97/6338	2.17685e-08	7.27795e-06	6.59548e-06	780425/100155466/100174964/100153175/100154518/100155875/100154462/100522899/100037957/100134958/100521443/100192436/494457/100625944/396849/100144504/100515138/100037998	18
CD8_effector	CD8_effector	GO:0030833	regulation of actin filament polymerization	14/245	60/6338	4.06854e-08	1.02019e-05	9.24522e-06	780425/100174964/100153175/100154518/100155875/100154462/100522899/100037957/100134958/100521443/100192436/494457/396849/100037998	14
CD8_effector	CD8_effector	GO:0032970	regulation of actin filament-based process	18/245	103/6338	5.77837e-08	1.28793e-05	1.16716e-05	780425/100155466/100174964/100153175/100154518/100155875/100154462/100522899/100037957/100134958/100521443/100192436/494457/100625944/396849/100144504/100515138/100037998	18
CD8_effector	CD8_effector	GO:0031334	positive regulation of protein-containing complex assembly	13/245	64/6338	7.08515e-07	9.01558e-05	8.17018e-05	780425/100174964/100153175/100154518/100155875/100154462/100522899/100521443/100192436/396991/780404/100152555/396849	13
CD8_effector	CD8_effector	GO:0006897	endocytosis	18/245	121/6338	7.19089e-07	9.01558e-05	8.17018e-05	414396/397536/100037305/100621359/100155929/100524413/397406/100151746/100192436/100525654/397019/396943/396979/100523862/100144504/100523840/100520876/100625256	18
CD8_effector	CD8_effector	GO:0007229	integrin-mediated signaling pathway	10/245	37/6338	8.60082e-07	9.58514e-05	8.68632e-05	100153483/100155929/100525326/100623256/100145895/100521477/733681/397019/396943/397221	10
CD8_effector	CD8_effector	GO:0007264	small GTPase mediated signal transduction	18/245	125/6338	1.17526e-06	0.000124083	0.000112447	780425/100529116/100155466/100522899/100521443/100156313/100151746/100517685/100518251/100621675/100153199/100152555/100144507/100516830/396849/100520019/100144504/100523840	18
CD8_effector	CD8_effector	GO:1902905	positive regulation of supramolecular fiber organization	12/245	58/6338	1.55852e-06	0.00014461	0.000131049	780425/100174964/100153175/100154518/100155875/100154462/100522899/100521443/100192436/100625944/396849/100515138	12
CD8_effector	CD8_effector	GO:0051258	protein polymerization	15/245	91/6338	1.65804e-06	0.00014461	0.000131049	780425/100174964/100153175/100154518/100155875/100154462/100522899/100037957/100134958/100521443/100192436/100521992/494457/396849/100037998	15
CD8_effector	CD8_effector	GO:0044089	positive regulation of cellular component biogenesis	18/245	131/6338	2.36025e-06	0.000197278	0.000178779	780425/100174964/100153175/100154518/100155875/100154462/100522899/100521443/100151746/100192436/396991/780404/100621675/100152555/100625944/396849/100523840/100515138	18
CD8_effector	CD8_effector	GO:0097435	supramolecular fiber organization	23/245	211/6338	5.5878e-06	0.000400326	0.000362787	780425/100174964/100153175/100154518/100155875/100154462/100522899/100037957/100134958/100521443/100192436/100521992/100156254/100154178/100621675/494457/100625944/396849/100144504/100515138/100037998/414388/100522394	23
CD8_effector	CD8_effector	GO:0032535	regulation of cellular component size	15/245	108/6338	1.46937e-05	0.0010164	0.000921087	780425/100174964/100153175/100154518/100155875/100154462/100522899/100037957/100134958/100521443/100192436/494457/396849/100233201/100037998	15
CD8_effector	CD8_effector	GO:1902531	regulation of intracellular signal transduction	32/245	384/6338	2.58205e-05	0.00167084	0.00151416	780425/100155466/397536/396668/396613/100156313/414381/100516408/100240743/396826/100151746/100517685/100192436/397267/100518251/100518302/100523716/100516343/780404/396851/397091/100153199/100152555/100144507/733670/396849/100156358/100520614/100233201/397086/100620198/100154191	32
CD8_effector	CD8_effector	GO:0090066	regulation of anatomical structure size	18/245	159/6338	3.64959e-05	0.00228784	0.00207331	780425/100174964/100153175/100154518/100155875/100154462/397636/100522899/100037957/100134958/100521443/100192436/100174959/494457/733670/396849/100233201/100037998	18
CD8_effector	CD8_effector	GO:0007160	cell-matrix adhesion	8/245	42/6338	0.000167633	0.00960777	0.00870684	100153483/100155929/397019/396943/397221/396849/100515138/396974	8
CD8_effector	CD8_effector	GO:0001819	positive regulation of cytokine production	14/245	133/6338	0.000576134	0.029634	0.0268551	100153635/397231/100516408/100240743/397406/100151746/396991/396611/100145895/396737/100155269/780404/100625944/396752	14
CD8_effector	CD8_effector	GO:0097190	apoptotic signaling pathway	14/245	135/6338	0.000670031	0.0312577	0.0283266	397536/414381/100240743/396826/100518898/397130/396991/100516343/780404/102163020/100520614/100233201/100511116/397086	14
CD8_effector	CD8_effector	GO:0008360	regulation of cell shape	7/245	40/6338	0.000739559	0.0337172	0.0305555	100521443/100156313/100520585/396849/100144504/100523840/100233201	7
CD8_effector	CD8_effector	GO:0002682	regulation of immune system process	26/245	350/6338	0.000931777	0.0415365	0.0376416	396613/100153635/397231/397441/100516408/100154110/100524827/397406/100151746/100517685/397267/100153038/396991/100516292/396611/100145895/396737/100627864/100154284/100621675/100625944/100518270/396849/100144504/396752/100620198	26
CD8_memory	CD8_memory	GO:0050865	regulation of cell activation	11/70	136/6338	2.17615e-07	0.000295521	0.000256557	396942/100515419/397161/397067/100522387/733631/100522635/733597/397412/100153191/100622156	11
CD8_memory	CD8_memory	GO:0002682	regulation of immune system process	16/70	350/6338	8.53131e-07	0.000509893	0.000442664	396942/100126235/100381266/100515419/397161/100522387/396969/100524123/733631/100522635/733597/100125555/397412/100154500/100153191/100622156	16
CD8_memory	CD8_memory	GO:0019882	antigen processing and presentation	6/70	36/6338	2.19057e-06	0.000509893	0.000442664	100381266/396660/100037960/445528/100135050/100037921	6
CD8_memory	CD8_memory	GO:0032101	regulation of response to external stimulus	12/70	209/6338	2.37834e-06	0.000509893	0.000442664	396942/100381266/396660/397067/100522387/396659/733631/100522635/100125555/397412/100154500/100622156	12
CD8_memory	CD8_memory	GO:0001775	cell activation	13/70	269/6338	5.87352e-06	0.000886249	0.000769397	396942/100515419/397161/397067/100522387/733631/100522635/733597/399522/100512978/397412/100153191/100622156	13
CD8_memory	CD8_memory	GO:0045321	leukocyte activation	12/70	238/6338	9.1556e-06	0.00124333	0.0010794	396942/100515419/397161/100522387/733631/100522635/733597/399522/100512978/397412/100153191/100622156	12
CD8_memory	CD8_memory	GO:0002250	adaptive immune response	9/70	132/6338	1.24551e-05	0.00130107	0.00112953	396942/100522387/396969/100522635/399522/445528/100135050/100037921/100622156	9
CD8_memory	CD8_memory	GO:0050900	leukocyte migration	7/70	88/6338	4.61366e-05	0.0041769	0.00362618	396942/100381266/100524123/733631/100522635/100512978/397412	7
CD8_memory	CD8_memory	GO:0060326	cell chemotaxis	7/70	97/6338	8.63005e-05	0.00629433	0.00546442	396942/100381266/100524123/396659/100522635/100512978/397412	7
CD8_memory	CD8_memory	GO:0032946	positive regulation of mononuclear cell proliferation	5/70	42/6338	8.81097e-05	0.00629433	0.00546442	396942/100515419/397161/100522635/397412	5
CD8_memory	CD8_memory	GO:0030155	regulation of cell adhesion	9/70	170/6338	9.27001e-05	0.00629433	0.00546442	396942/100381266/100515419/397161/397067/100524123/396659/733631/733597	9
CD8_memory	CD8_memory	GO:0001776	leukocyte homeostasis	4/70	25/6338	0.000144894	0.00828885	0.00719596	100522635/397412/100153191/100622156	4
CD8_memory	CD8_memory	GO:0010647	positive regulation of cell communication	13/70	375/6338	0.000191735	0.010415	0.00904182	100381266/396660/100522387/396969/396659/733631/100522635/399522/100125555/397412/100157112/100524790/100622156	13
CD8_memory	CD8_memory	GO:0023056	positive regulation of signaling	13/70	379/6338	0.000213048	0.0107155	0.0093027	100381266/396660/100522387/396969/396659/733631/100522635/399522/100125555/397412/100157112/100524790/100622156	13
CD8_memory	CD8_memory	GO:0009967	positive regulation of signal transduction	12/70	335/6338	0.000258596	0.0125419	0.0108883	100381266/396660/100522387/396969/396659/733631/100522635/399522/100125555/397412/100157112/100622156	12
CD8_memory	CD8_memory	GO:0031663	lipopolysaccharide-mediated signaling pathway	3/70	14/6338	0.000430467	0.0182447	0.0158392	100125555/397412/100622156	3
CD8_memory	CD8_memory	GO:0033993	response to lipid	8/70	166/6338	0.000443355	0.0182447	0.0158392	396942/100126235/100381266/397161/396969/100125555/397412/100622156	8
CD8_memory	CD8_memory	GO:0007569	cell aging	4/70	35/6338	0.000551848	0.0214117	0.0185886	100381266/397412/100157112/397036	4
CD8_memory	CD8_memory	GO:0040012	regulation of locomotion	9/70	222/6338	0.000682676	0.023597	0.0204858	396942/100381266/396969/100524123/396659/733631/100522635/397019/397412	9
CD8_memory	CD8_memory	GO:0051270	regulation of cellular component movement	9/70	224/6338	0.000728263	0.023597	0.0204858	396942/100381266/397067/396969/100524123/733631/100522635/397019/397412	9
CD8_memory	CD8_memory	GO:0048584	positive regulation of response to stimulus	14/70	493/6338	0.00082023	0.025904	0.0224886	396942/100381266/100515419/396660/100522387/396969/396659/733631/100522635/399522/100125555/397412/100157112/100622156	14
CD8_memory	CD8_memory	GO:0007155	cell adhesion	11/70	332/6338	0.000924722	0.0264499	0.0229625	396942/100381266/100515419/397161/397067/100524123/396659/733631/733597/397019/100512978	11
CD8_memory	CD8_memory	GO:0072577	endothelial cell apoptotic process	3/70	18/6338	0.000934902	0.0264499	0.0229625	733631/100157112/100622156	3
CD8_memory	CD8_memory	GO:2000351	regulation of endothelial cell apoptotic process	3/70	18/6338	0.000934902	0.0264499	0.0229625	733631/100157112/100622156	3
CD8_memory	CD8_memory	GO:0022610	biological adhesion	11/70	336/6338	0.00102059	0.0271758	0.0235926	396942/100381266/100515419/397161/397067/100524123/396659/733631/733597/397019/100512978	11
CD8_memory	CD8_memory	GO:0042093	T-helper cell differentiation	3/70	19/6338	0.00110145	0.0282219	0.0245009	396942/100522635/399522	3
CD8_memory	CD8_memory	GO:0002287	alpha-beta T cell activation involved in immune response	3/70	20/6338	0.00128561	0.0295908	0.0256892	396942/100522635/399522	3
CD8_memory	CD8_memory	GO:0001816	cytokine production	8/70	200/6338	0.001505	0.0322149	0.0279673	396942/396660/733631/399522/100125555/397412/397036/100622156	8
CD8_memory	CD8_memory	GO:0007568	aging	4/70	47/6338	0.00170168	0.0341388	0.0296376	100381266/397412/100157112/397036	4
CD8_memory	CD8_memory	GO:0071396	cellular response to lipid	6/70	117/6338	0.00174352	0.0343145	0.0297902	396942/100381266/397161/100125555/397412/100622156	6
CD8_memory	CD8_memory	GO:0006935	chemotaxis	7/70	163/6338	0.00201049	0.0379201	0.0329204	396942/100381266/100524123/396659/100522635/100512978/397412	7
CD8_memory	CD8_memory	GO:0050920	regulation of chemotaxis	4/70	50/6338	0.00214324	0.038807	0.0336903	100381266/396659/100522635/397412	4
CD8_memory	CD8_memory	GO:0050727	regulation of inflammatory response	5/70	84/6338	0.00223517	0.0389149	0.033784	396942/396660/100522387/733631/100622156	5
CD8_naive	CD8_naive	GO:0006412	translation	38/145	247/6338	5.66795e-22	9.69787e-19	9.24771e-19	100154920/100101929/100101928/100157971/100514395/100624945/100153958/397605/100037993/414422/397047/414398/100627662/396768/100517840/397598/100515520/100135671/733592/100627537/100049695/100513643/100513660/397650/100513520/397607/414397/396980/414395/100037996/396638/100037997/100519021/414390/397611/100517165/100038023/100623328	38
CD8_naive	CD8_naive	GO:0006518	peptide metabolic process	41/145	308/6338	2.76976e-21	1.57969e-18	1.50636e-18	396969/100154920/100101929/100101928/100152951/100157971/100514395/100624945/100153958/397605/100037993/414422/397047/414398/100627662/396768/100517840/397598/100515520/100135671/733592/100627537/100049695/100513643/100513660/397650/100513520/397607/414397/396980/414395/100037996/396638/100037997/100519021/414390/397611/100517165/100038023/100623328/397036	41
CD8_naive	CD8_naive	GO:0042254	ribosome biogenesis	18/145	112/6338	4.64232e-11	1.32384e-08	1.26239e-08	100626002/414404/100511136/100518312/100512446/100627227/100627662/397598/733592/414418/100049695/397607/414397/100037996/100519021/100038023/100622345/100623328	18
CD8_naive	CD8_naive	GO:0006364	rRNA processing	11/145	82/6338	2.13916e-06	0.00036601	0.000349021	100626002/414404/100518312/100627227/100627662/397598/414418/414397/100037996/100038023/100622345	11
CD8_naive	CD8_naive	GO:0016072	rRNA metabolic process	11/145	84/6338	2.72852e-06	0.00042441	0.000404709	100626002/414404/100518312/100627227/100627662/397598/414418/414397/100037996/100038023/100622345	11
CD8_naive	CD8_naive	GO:0042255	ribosome assembly	6/145	24/6338	1.23852e-05	0.00176592	0.00168395	100511136/733592/100049695/397607/100519021/100623328	6
CD8_naive	CD8_naive	GO:0000027	ribosomal large subunit assembly	4/145	12/6338	0.00011279	0.0137845	0.0131447	100511136/733592/100049695/100623328	4
CD8_naive	CD8_naive	GO:0048872	homeostasis of number of cells	8/145	77/6338	0.000343063	0.039132	0.0373156	102160665/100521183/414404/397412/100157105/100038023/397036/397078	8
CD8_naive	CD8_naive	GO:0097193	intrinsic apoptotic signaling pathway	7/145	60/6338	0.000397444	0.0425017	0.0405288	100156860/397360/100153821/397412/100738625/100627662/100518125	7
Genesets	CD8_terminal_effector	CD8_effector	CD8_memory	CD8_naive
HALLMARK_ADIPOGENESIS	0.28032	0.262361	0.26773	0.269673
HALLMARK_ALLOGRAFT_REJECTION	0.443399	0.459632	0.428207	0.364475
HALLMARK_ANDROGEN_RESPONSE	0.222579	0.228367	0.246724	0.254083
HALLMARK_ANGIOGENESIS	-0.272663	-0.243944	-0.173619	-0.217171
HALLMARK_APICAL_JUNCTION	0.108145	0.0978916	0.0877978	0.0802237
HALLMARK_APICAL_SURFACE	0.0324794	0.0050707	0.086326	0.128841
HALLMARK_APOPTOSIS	0.353735	0.376826	0.33663	0.313202
HALLMARK_BILE_ACID_METABOLISM	-0.0416084	-0.0458297	-0.0523848	-0.0268662
HALLMARK_CHOLESTEROL_HOMEOSTASIS	0.169876	0.16252	0.169579	0.13699
HALLMARK_COAGULATION	-0.0363855	-0.0445572	-0.0259356	-0.0994521
HALLMARK_COMPLEMENT	0.280762	0.27347	0.257282	0.202288
HALLMARK_DNA_REPAIR	0.408138	0.422149	0.442051	0.446618
HALLMARK_E2F_TARGETS	0.299325	0.302428	0.300682	0.308744
HALLMARK_EPITHELIAL_MESENCHYMAL_TRANSITION	-0.113788	-0.0936513	-0.0824932	-0.060419
HALLMARK_ESTROGEN_RESPONSE_EARLY	-0.0122408	0.0153079	0.0415496	0.0617764
HALLMARK_ESTROGEN_RESPONSE_LATE	0.0295001	0.0531252	0.0452644	0.0373233
HALLMARK_FATTY_ACID_METABOLISM	0.389449	0.361427	0.341787	0.323944
HALLMARK_G2M_CHECKPOINT	0.293923	0.299178	0.279358	0.287448
HALLMARK_GLYCOLYSIS	0.154739	0.156808	0.155915	0.156572
HALLMARK_HEDGEHOG_SIGNALING	0.0394282	0.00850868	0.00183371	-0.0278009
HALLMARK_HEME_METABOLISM	0.250818	0.249377	0.253393	0.226283
HALLMARK_HYPOXIA	0.200855	0.227145	0.215254	0.169913
HALLMARK_IL2_STAT5_SIGNALING	0.135985	0.161796	0.122284	0.0268801
HALLMARK_IL6_JAK_STAT3_SIGNALING	0.256398	0.304844	0.238451	0.154411
HALLMARK_INFLAMMATORY_RESPONSE	0.0859067	0.118032	0.123049	0.0633877
HALLMARK_INTERFERON_ALPHA_RESPONSE	0.581339	0.555624	0.516274	0.448571
HALLMARK_INTERFERON_GAMMA_RESPONSE	0.516616	0.515159	0.47969	0.390829
HALLMARK_KRAS_SIGNALING_DN	-0.186617	-0.156154	-0.173557	-0.198768
HALLMARK_KRAS_SIGNALING_UP	0.0689193	0.0836809	0.0833315	0.043523
HALLMARK_MITOTIC_SPINDLE	0.232154	0.210176	0.186848	0.181477
HALLMARK_MTORC1_SIGNALING	0.453918	0.461178	0.460532	0.426099
HALLMARK_MYC_TARGETS_V1	0.669204	0.673564	0.703478	0.727337
HALLMARK_MYC_TARGETS_V2	0.204758	0.200339	0.300345	0.416844
HALLMARK_MYOGENESIS	-0.000534827	0.016393	-0.0104505	-0.0305326
HALLMARK_NOTCH_SIGNALING	0.11297	0.140612	0.173794	0.171386
HALLMARK_OXIDATIVE_PHOSPHORYLATION	0.676333	0.635813	0.650907	0.637489
HALLMARK_P53_PATHWAY	0.170922	0.211624	0.180578	0.15324
HALLMARK_PANCREAS_BETA_CELLS	0.0306096	0.0351758	0.0989701	0.0546328
HALLMARK_PEROXISOME	0.17758	0.165629	0.148549	0.165535
HALLMARK_PI3K_AKT_MTOR_SIGNALING	0.470351	0.484559	0.468752	0.430117
HALLMARK_PROTEIN_SECRETION	0.417368	0.428006	0.393236	0.388497
HALLMARK_REACTIVE_OXYGEN_SPECIES_PATHWAY	0.469261	0.455961	0.45449	0.418742
HALLMARK_SPERMATOGENESIS	-0.000777775	-0.030799	-0.0474148	-0.0358676
HALLMARK_TGF_BETA_SIGNALING	0.160428	0.167216	0.21146	0.257871
HALLMARK_TNFA_SIGNALING_VIA_NFKB	0.130338	0.200274	0.166445	0.123993
HALLMARK_UNFOLDED_PROTEIN_RESPONSE	0.45651	0.480863	0.504777	0.524617
HALLMARK_UV_RESPONSE_DN	0.0891824	0.076511	0.0733407	0.0795466
HALLMARK_UV_RESPONSE_UP	0.239394	0.253147	0.25323	0.259083
HALLMARK_WNT_BETA_CATENIN_SIGNALING	0.10192	0.121872	0.166961	0.202858
HALLMARK_XENOBIOTIC_METABOLISM	0.0937178	0.0872566	0.0460863	0.051476
Genesets	CD8_terminal_effector	CD8_effector	CD8_memory	CD8_naive
KEGG_ABC_TRANSPORTERS	-0.0758189	-0.0931487	-0.104063	-0.0727321
KEGG_ACUTE_MYELOID_LEUKEMIA	0.206459	0.21865	0.230032	0.234738
KEGG_ADHERENS_JUNCTION	0.147323	0.149595	0.145898	0.159528
KEGG_ADIPOCYTOKINE_SIGNALING_PATHWAY	0.148126	0.162219	0.114648	0.080346
KEGG_ALANINE_ASPARTATE_AND_GLUTAMATE_METABOLISM	0.0049169	0.0236665	0.0155187	0.0194893
KEGG_ALDOSTERONE_REGULATED_SODIUM_REABSORPTION	0.0540549	0.0604887	0.0398166	0.059161
KEGG_ALLOGRAFT_REJECTION	0.20311	0.289877	0.210129	0.0469976
KEGG_ALPHA_LINOLENIC_ACID_METABOLISM	-0.0410551	-0.0510354	-0.0261317	0.000869247
KEGG_ALZHEIMERS_DISEASE	0.393508	0.380162	0.372447	0.364478
KEGG_AMINO_SUGAR_AND_NUCLEOTIDE_SUGAR_METABOLISM	0.150472	0.13959	0.13246	0.127436
KEGG_AMINOACYL_TRNA_BIOSYNTHESIS	-0.0493759	-0.0840946	-0.0002675	0.0227267
KEGG_AMYOTROPHIC_LATERAL_SCLEROSIS_ALS	0.208838	0.21335	0.184731	0.148348
KEGG_ANTIGEN_PROCESSING_AND_PRESENTATION	0.390832	0.409535	0.403324	0.381256
KEGG_APOPTOSIS	0.253652	0.253833	0.219877	0.178788
KEGG_ARACHIDONIC_ACID_METABOLISM	-0.110649	-0.105536	-0.0922874	-0.0952447
KEGG_ARGININE_AND_PROLINE_METABOLISM	0.0481557	0.0423983	0.0135604	0.00829175
KEGG_ARRHYTHMOGENIC_RIGHT_VENTRICULAR_CARDIOMYOPATHY_ARVC	0.0531311	0.0793621	0.109582	0.114602
KEGG_ASCORBATE_AND_ALDARATE_METABOLISM	0.0430946	0.0143696	0.0373962	-0.0234153
KEGG_ASTHMA	0.0929852	0.204597	0.0845829	-0.0252273
KEGG_AUTOIMMUNE_THYROID_DISEASE	0.153678	0.226485	0.204122	0.0501836
KEGG_AXON_GUIDANCE	0.113233	0.116132	0.0959056	0.077486
KEGG_B_CELL_RECEPTOR_SIGNALING_PATHWAY	0.271234	0.272076	0.259162	0.241699
KEGG_BASAL_CELL_CARCINOMA	-0.138175	-0.126373	-0.112705	-0.107177
KEGG_BASAL_TRANSCRIPTION_FACTORS	0.230783	0.213831	0.213945	0.238512
KEGG_BASE_EXCISION_REPAIR	0.0747451	0.0944299	0.0976413	0.108637
KEGG_BETA_ALANINE_METABOLISM	0.115678	0.0570655	0.0435246	-0.000998432
KEGG_BIOSYNTHESIS_OF_UNSATURATED_FATTY_ACIDS	0.161119	0.153797	0.119142	0.0951461
KEGG_BLADDER_CANCER	0.112845	0.135167	0.0911919	0.0814672
KEGG_BUTANOATE_METABOLISM	0.161083	0.124867	0.121059	0.105228
KEGG_CALCIUM_SIGNALING_PATHWAY	0.0507939	0.0393288	0.020307	-3.98766e-05
KEGG_CARDIAC_MUSCLE_CONTRACTION	0.282818	0.26848	0.295815	0.303446
KEGG_CELL_ADHESION_MOLECULES_CAMS	0.0297454	0.0602245	0.0591671	-0.00729007
KEGG_CELL_CYCLE	0.178949	0.187043	0.180612	0.190475
KEGG_CHEMOKINE_SIGNALING_PATHWAY	0.211914	0.212201	0.215758	0.173213
KEGG_CHRONIC_MYELOID_LEUKEMIA	0.241354	0.252469	0.237253	0.230731
KEGG_CIRCADIAN_RHYTHM_MAMMAL	0.0288866	0.0766999	-0.0195505	-0.0433739
KEGG_CITRATE_CYCLE_TCA_CYCLE	0.385068	0.363545	0.384091	0.376752
KEGG_COLORECTAL_CANCER	0.218548	0.233395	0.23745	0.247418
KEGG_COMPLEMENT_AND_COAGULATION_CASCADES	-0.318986	-0.350395	-0.321125	-0.390978
KEGG_CYSTEINE_AND_METHIONINE_METABOLISM	0.17437	0.161431	0.146301	0.163982
KEGG_CYTOKINE_CYTOKINE_RECEPTOR_INTERACTION	-0.0642816	-0.0241399	-0.0367743	-0.145829
KEGG_CYTOSOLIC_DNA_SENSING_PATHWAY	0.215053	0.204611	0.1792	0.151848
KEGG_DILATED_CARDIOMYOPATHY	0.100649	0.114833	0.128849	0.123171
KEGG_DNA_REPLICATION	0.13745	0.148196	0.154507	0.170571
KEGG_DORSO_VENTRAL_AXIS_FORMATION	0.205497	0.199416	0.17421	0.202507
KEGG_DRUG_METABOLISM_CYTOCHROME_P450	0.0841337	0.0608265	0.0412268	0.118552
KEGG_DRUG_METABOLISM_OTHER_ENZYMES	0.0713901	0.0842078	0.0918445	0.0780267
KEGG_ECM_RECEPTOR_INTERACTION	-0.0753372	-0.0925622	-0.08125	-0.104962
KEGG_ENDOCYTOSIS	0.143053	0.155687	0.144177	0.130379
KEGG_ENDOMETRIAL_CANCER	0.217266	0.218866	0.213175	0.235782
KEGG_EPITHELIAL_CELL_SIGNALING_IN_HELICOBACTER_PYLORI_INFECTION	0.161282	0.137555	0.124526	0.115965
KEGG_ERBB_SIGNALING_PATHWAY	0.165463	0.166659	0.160652	0.164149
KEGG_ETHER_LIPID_METABOLISM	0.0143849	0.00932594	0.00534388	-0.0351225
KEGG_FATTY_ACID_METABOLISM	0.232558	0.205159	0.203236	0.202485
KEGG_FC_EPSILON_RI_SIGNALING_PATHWAY	0.191949	0.184102	0.163994	0.150784
KEGG_FC_GAMMA_R_MEDIATED_PHAGOCYTOSIS	0.202911	0.201156	0.185333	0.18219
KEGG_FOCAL_ADHESION	0.169069	0.168244	0.162983	0.157178
KEGG_FOLATE_BIOSYNTHESIS	-0.0582617	-0.010943	0.0625368	0.0229208
KEGG_FRUCTOSE_AND_MANNOSE_METABOLISM	0.0901277	0.0683665	0.0935259	0.0602792
KEGG_GALACTOSE_METABOLISM	0.132739	0.116775	0.0935704	0.0587842
KEGG_GAP_JUNCTION	0.167246	0.158057	0.153658	0.141027
KEGG_GLIOMA	0.243245	0.242337	0.221449	0.19293
KEGG_GLUTATHIONE_METABOLISM	0.140912	0.136017	0.106406	0.141945
KEGG_GLYCEROLIPID_METABOLISM	-0.0674334	-0.0847346	-0.061537	-0.0771523
KEGG_GLYCEROPHOSPHOLIPID_METABOLISM	-0.00930976	-0.0120185	-0.00955061	-0.0315842
KEGG_GLYCINE_SERINE_AND_THREONINE_METABOLISM	-0.178138	-0.209951	-0.173635	-0.174791
KEGG_GLYCOLYSIS_GLUCONEOGENESIS	0.21122	0.202134	0.205115	0.16785
KEGG_GLYCOSAMINOGLYCAN_BIOSYNTHESIS_CHONDROITIN_SULFATE	0.0176291	0.0326915	-0.00822798	-0.0512161
KEGG_GLYCOSAMINOGLYCAN_BIOSYNTHESIS_HEPARAN_SULFATE	-0.164012	-0.185273	-0.183537	-0.178735
KEGG_GLYCOSAMINOGLYCAN_BIOSYNTHESIS_KERATAN_SULFATE	-0.0598594	-0.0987274	0.0218368	0.0788602
KEGG_GLYCOSAMINOGLYCAN_DEGRADATION	-0.0141386	-0.00938625	0.0163893	-0.00997635
KEGG_GLYCOSPHINGOLIPID_BIOSYNTHESIS_GANGLIO_SERIES	0.108929	0.103354	0.0878319	0.0502527
KEGG_GLYCOSPHINGOLIPID_BIOSYNTHESIS_GLOBO_SERIES	0.119417	0.116686	0.165493	0.14424
KEGG_GLYCOSPHINGOLIPID_BIOSYNTHESIS_LACTO_AND_NEOLACTO_SERIES	-0.0555747	-0.0369824	0.0127677	-0.0306829
KEGG_GLYCOSYLPHOSPHATIDYLINOSITOL_GPI_ANCHOR_BIOSYNTHESIS	0.087257	0.0951588	0.0906458	0.0919738
KEGG_GLYOXYLATE_AND_DICARBOXYLATE_METABOLISM	0.168645	0.118197	0.156288	0.160745
KEGG_GNRH_SIGNALING_PATHWAY	0.120867	0.108448	0.10538	0.0977074
KEGG_GRAFT_VERSUS_HOST_DISEASE	0.294547	0.371729	0.319365	0.143229
KEGG_HEDGEHOG_SIGNALING_PATHWAY	-0.0604414	-0.0713787	-0.0609999	-0.058203
KEGG_HEMATOPOIETIC_CELL_LINEAGE	0.114199	0.156071	0.169232	0.114118
KEGG_HISTIDINE_METABOLISM	-0.0951118	-0.0949541	-0.103232	-0.0895035
KEGG_HOMOLOGOUS_RECOMBINATION	0.0394496	0.0761245	0.0686734	0.0825596
KEGG_HUNTINGTONS_DISEASE	0.371393	0.358097	0.366219	0.366129
KEGG_HYPERTROPHIC_CARDIOMYOPATHY_HCM	0.0745521	0.107659	0.119814	0.111487
KEGG_INOSITOL_PHOSPHATE_METABOLISM	0.0318255	0.0386701	0.0327668	0.0283253
KEGG_INSULIN_SIGNALING_PATHWAY	0.181957	0.182662	0.169848	0.163481
KEGG_INTESTINAL_IMMUNE_NETWORK_FOR_IGA_PRODUCTION	0.0418019	0.106569	0.127394	0.0669356
KEGG_JAK_STAT_SIGNALING_PATHWAY	0.118586	0.141442	0.108422	0.0910782
KEGG_LEISHMANIA_INFECTION	0.232697	0.260789	0.208532	0.164919
KEGG_LEUKOCYTE_TRANSENDOTHELIAL_MIGRATION	0.237916	0.230195	0.23459	0.222328
KEGG_LIMONENE_AND_PINENE_DEGRADATION	0.119505	0.0915573	0.0978394	0.0523684
KEGG_LINOLEIC_ACID_METABOLISM	-0.185311	-0.156527	-0.184457	-0.189402
KEGG_LONG_TERM_DEPRESSION	0.129682	0.120868	0.127046	0.122079
KEGG_LONG_TERM_POTENTIATION	0.287745	0.27859	0.273252	0.260301
KEGG_LYSINE_DEGRADATION	0.134474	0.115181	0.0858658	0.105688
KEGG_LYSOSOME	0.185715	0.178059	0.168365	0.16414
KEGG_MAPK_SIGNALING_PATHWAY	0.136121	0.15022	0.142376	0.122339
KEGG_MATURITY_ONSET_DIABETES_OF_THE_YOUNG	-0.337739	-0.256766	-0.362417	-0.304803
KEGG_MELANOGENESIS	0.0903781	0.0940349	0.0992577	0.0955052
KEGG_MELANOMA	0.155909	0.15603	0.131014	0.115557
KEGG_METABOLISM_OF_XENOBIOTICS_BY_CYTOCHROME_P450	0.0598494	0.0309631	0.0306505	0.0966279
KEGG_MISMATCH_REPAIR	0.188891	0.194829	0.190518	0.2083
KEGG_MTOR_SIGNALING_PATHWAY	0.230785	0.229797	0.208425	0.219837
KEGG_N_GLYCAN_BIOSYNTHESIS	0.179919	0.185985	0.214686	0.220192
KEGG_NATURAL_KILLER_CELL_MEDIATED_CYTOTOXICITY	0.326574	0.32896	0.272904	0.228379
KEGG_NEUROACTIVE_LIGAND_RECEPTOR_INTERACTION	-0.163348	-0.171591	-0.200083	-0.242849
KEGG_NEUROTROPHIN_SIGNALING_PATHWAY	0.236424	0.233852	0.21225	0.203732
KEGG_NICOTINATE_AND_NICOTINAMIDE_METABOLISM	-0.0277215	-0.0350539	-0.0231669	-0.0349966
KEGG_NITROGEN_METABOLISM	-0.0433132	0.00642865	-0.0515231	-0.0721088
KEGG_NOD_LIKE_RECEPTOR_SIGNALING_PATHWAY	0.204096	0.212477	0.196307	0.177749
KEGG_NON_HOMOLOGOUS_END_JOINING	0.0511512	0.0196889	0.0256491	0.0407604
KEGG_NON_SMALL_CELL_LUNG_CANCER	0.240854	0.242487	0.213705	0.206167
KEGG_NOTCH_SIGNALING_PATHWAY	0.160164	0.156953	0.123809	0.130957
KEGG_NUCLEOTIDE_EXCISION_REPAIR	0.215606	0.209235	0.222712	0.229045
KEGG_O_GLYCAN_BIOSYNTHESIS	-0.0639538	-0.0687023	-0.0301886	0.0223779
KEGG_OLFACTORY_TRANSDUCTION	0.275875	0.277617	0.243123	0.232013
KEGG_ONE_CARBON_POOL_BY_FOLATE	-0.136616	-0.13444	-0.0961878	-0.0914076
KEGG_OOCYTE_MEIOSIS	0.225551	0.222694	0.214275	0.203748
KEGG_OTHER_GLYCAN_DEGRADATION	-0.0391507	-0.0395098	-0.0172872	-0.0538331
KEGG_OXIDATIVE_PHOSPHORYLATION	0.439184	0.424713	0.427871	0.426335
KEGG_P53_SIGNALING_PATHWAY	0.171034	0.187584	0.137973	0.131337
KEGG_PANCREATIC_CANCER	0.214539	0.229795	0.210325	0.211216
KEGG_PANTOTHENATE_AND_COA_BIOSYNTHESIS	-0.0131653	-0.0282963	-0.0360408	-0.0742107
KEGG_PARKINSONS_DISEASE	0.465888	0.449054	0.450698	0.446442
KEGG_PATHOGENIC_ESCHERICHIA_COLI_INFECTION	0.379862	0.389949	0.381892	0.367186
KEGG_PATHWAYS_IN_CANCER	0.137575	0.147799	0.142986	0.13271
KEGG_PENTOSE_AND_GLUCURONATE_INTERCONVERSIONS	0.203406	0.179546	0.203035	0.174404
KEGG_PENTOSE_PHOSPHATE_PATHWAY	0.284721	0.290937	0.280246	0.254241
KEGG_PEROXISOME	0.0889639	0.0869433	0.0700527	0.0884273
KEGG_PHENYLALANINE_METABOLISM	0.15725	0.161803	0.145289	0.124182
KEGG_PHOSPHATIDYLINOSITOL_SIGNALING_SYSTEM	0.0847848	0.0867446	0.0931698	0.0931704
KEGG_PORPHYRIN_AND_CHLOROPHYLL_METABOLISM	0.0876458	0.087942	0.0697593	0.064369
KEGG_PPAR_SIGNALING_PATHWAY	0.0257268	0.0111847	0.0102255	0.0150877
KEGG_PRIMARY_BILE_ACID_BIOSYNTHESIS	-0.120979	-0.163986	-0.0894969	-0.21538
KEGG_PRIMARY_IMMUNODEFICIENCY	0.20511	0.238238	0.241519	0.227196
KEGG_PRION_DISEASES	0.24597	0.24658	0.230184	0.227061
KEGG_PROGESTERONE_MEDIATED_OOCYTE_MATURATION	0.170867	0.16467	0.166778	0.169161
KEGG_PROPANOATE_METABOLISM	0.143211	0.101591	0.12413	0.129577
KEGG_PROSTATE_CANCER	0.185773	0.187438	0.189962	0.188466
KEGG_PROTEASOME	0.503893	0.501387	0.493646	0.474066
KEGG_PROTEIN_EXPORT	0.44009	0.445506	0.450255	0.442125
KEGG_PROXIMAL_TUBULE_BICARBONATE_RECLAMATION	0.0296987	0.0310705	0.0273301	0.0270788
KEGG_PURINE_METABOLISM	0.0730253	0.0798978	0.102821	0.125759
KEGG_PYRIMIDINE_METABOLISM	0.137887	0.14161	0.149455	0.145805
KEGG_PYRUVATE_METABOLISM	0.23783	0.203448	0.231933	0.217171
KEGG_REGULATION_OF_ACTIN_CYTOSKELETON	0.218685	0.2152	0.208557	0.192063
KEGG_REGULATION_OF_AUTOPHAGY	0.266586	0.270716	0.219574	0.187589
KEGG_RENAL_CELL_CARCINOMA	0.233225	0.231999	0.224794	0.233697
KEGG_RENIN_ANGIOTENSIN_SYSTEM	-0.0202372	-0.0169675	0.0386602	0.0298267
KEGG_RETINOL_METABOLISM	-0.0186562	-0.030763	0.0201183	0.0372876
KEGG_RIBOFLAVIN_METABOLISM	0.0933045	0.106325	0.109821	0.0771067
KEGG_RIBOSOME	0.606706	0.604152	0.608924	0.609022
KEGG_RIG_I_LIKE_RECEPTOR_SIGNALING_PATHWAY	0.244025	0.238144	0.217007	0.19333
KEGG_RNA_DEGRADATION	0.286221	0.277612	0.288449	0.310325
KEGG_RNA_POLYMERASE	0.265162	0.258625	0.269654	0.286894
KEGG_SELENOAMINO_ACID_METABOLISM	0.0787455	0.100953	0.0796164	0.121192
KEGG_SMALL_CELL_LUNG_CANCER	0.163141	0.173484	0.157492	0.125527
KEGG_SNARE_INTERACTIONS_IN_VESICULAR_TRANSPORT	0.183816	0.181509	0.165822	0.147593
KEGG_SPHINGOLIPID_METABOLISM	-0.0477421	-0.0154726	-0.0310065	-0.0523109
KEGG_SPLICEOSOME	0.416206	0.416109	0.41885	0.428352
KEGG_STARCH_AND_SUCROSE_METABOLISM	0.112081	0.123757	0.129598	0.120638
KEGG_STEROID_BIOSYNTHESIS	0.0751419	0.0699437	0.0364079	0.0657687
KEGG_STEROID_HORMONE_BIOSYNTHESIS	0.0411541	0.00935405	0.0549954	0.0876389
KEGG_SULFUR_METABOLISM	-0.0814096	-0.109047	-0.107249	-0.0910342
KEGG_SYSTEMIC_LUPUS_ERYTHEMATOSUS	0.0748849	0.147662	0.108804	0.0267738
KEGG_T_CELL_RECEPTOR_SIGNALING_PATHWAY	0.287403	0.312838	0.294141	0.256855
KEGG_TASTE_TRANSDUCTION	-0.0574232	-0.0577747	-0.104836	-0.0830929
KEGG_TAURINE_AND_HYPOTAURINE_METABOLISM	-0.18082	-0.196968	-0.150326	-0.0838357
KEGG_TERPENOID_BACKBONE_BIOSYNTHESIS	0.145889	0.0938571	0.0955942	0.0912625
KEGG_TGF_BETA_SIGNALING_PATHWAY	0.0839264	0.0998073	0.0915037	0.113626
KEGG_THYROID_CANCER	0.189429	0.199398	0.208174	0.223641
KEGG_TIGHT_JUNCTION	0.119137	0.103927	0.115698	0.115944
KEGG_TOLL_LIKE_RECEPTOR_SIGNALING_PATHWAY	0.171956	0.192617	0.159544	0.112423
KEGG_TRYPTOPHAN_METABOLISM	0.0760199	0.0265965	0.0465063	0.0336446
KEGG_TYPE_I_DIABETES_MELLITUS	0.245327	0.30975	0.254182	0.106196
KEGG_TYPE_II_DIABETES_MELLITUS	0.110591	0.122387	0.0865041	0.0926734
KEGG_TYROSINE_METABOLISM	0.112209	0.112518	0.103664	0.108307
KEGG_UBIQUITIN_MEDIATED_PROTEOLYSIS	0.204937	0.195266	0.197102	0.191928
KEGG_VALINE_LEUCINE_AND_ISOLEUCINE_BIOSYNTHESIS	0.117846	0.0925401	0.168703	0.0982787
KEGG_VALINE_LEUCINE_AND_ISOLEUCINE_DEGRADATION	0.15274	0.110082	0.145551	0.14197
KEGG_VASCULAR_SMOOTH_MUSCLE_CONTRACTION	0.0921054	0.0781311	0.0826166	0.0718257
KEGG_VASOPRESSIN_REGULATED_WATER_REABSORPTION	0.240217	0.244081	0.236964	0.221014
KEGG_VEGF_SIGNALING_PATHWAY	0.18141	0.183389	0.163869	0.149713
KEGG_VIBRIO_CHOLERAE_INFECTION	0.238173	0.223313	0.224264	0.218552
KEGG_VIRAL_MYOCARDITIS	0.26036	0.276887	0.272458	0.229239
KEGG_WNT_SIGNALING_PATHWAY	0.15114	0.155358	0.153596	0.151688
